# Supplementary material for: Genome-wide association and genomic prediction of breeding values for fatty acid composition in subcutaneous adipose and longissimus lumborum muscle of beef cattle
Source: PubMed Central journal article supplement (PMC4654876; doi:10.1186/s12863-015-0290-0), 2015-11-21

### 10:0 in LL

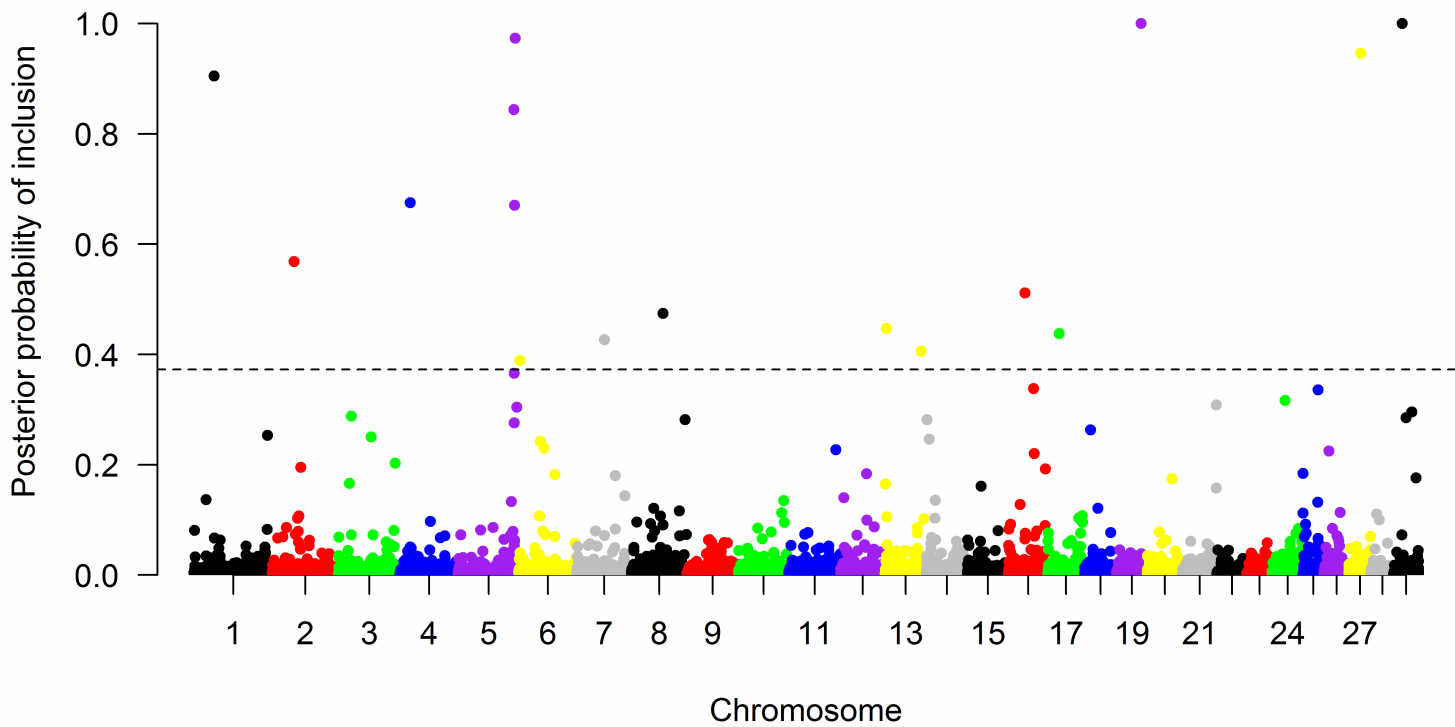

### 10:0 in SQ

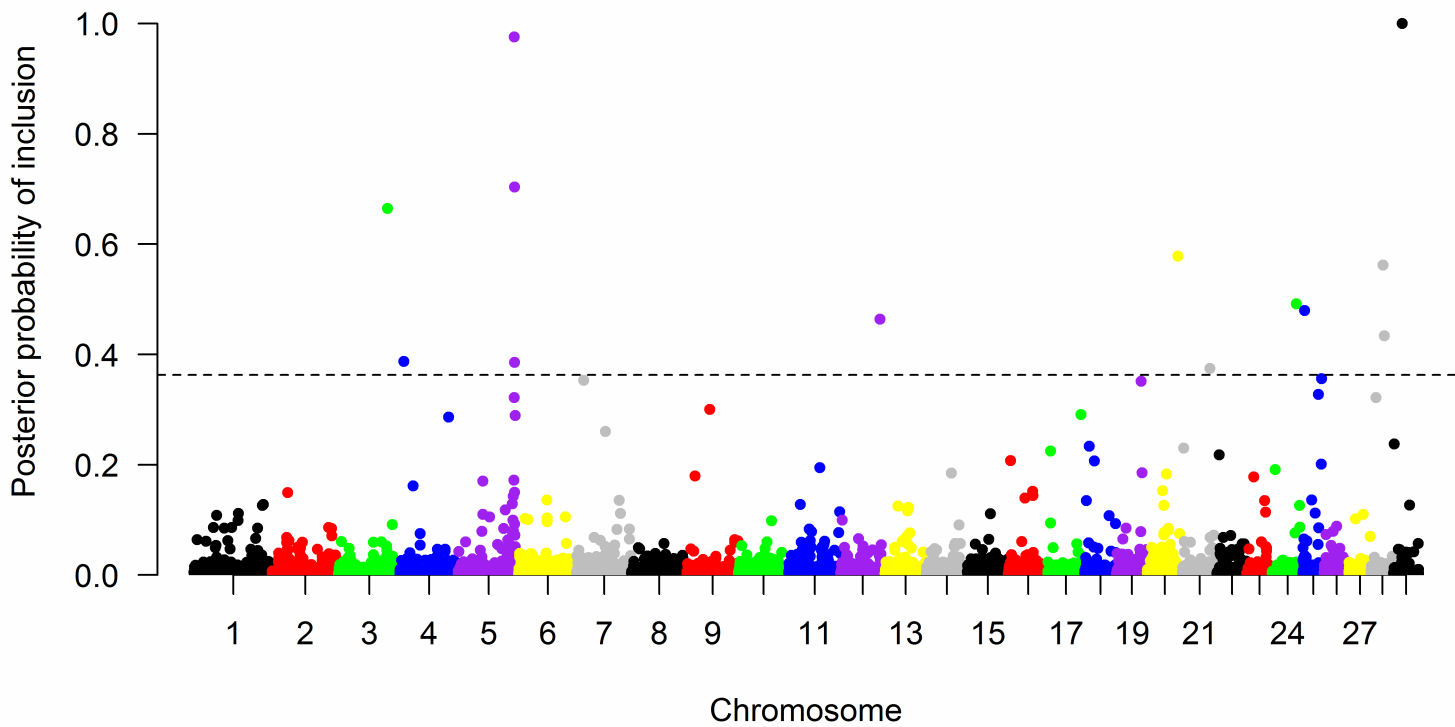

### 12:0 in LL

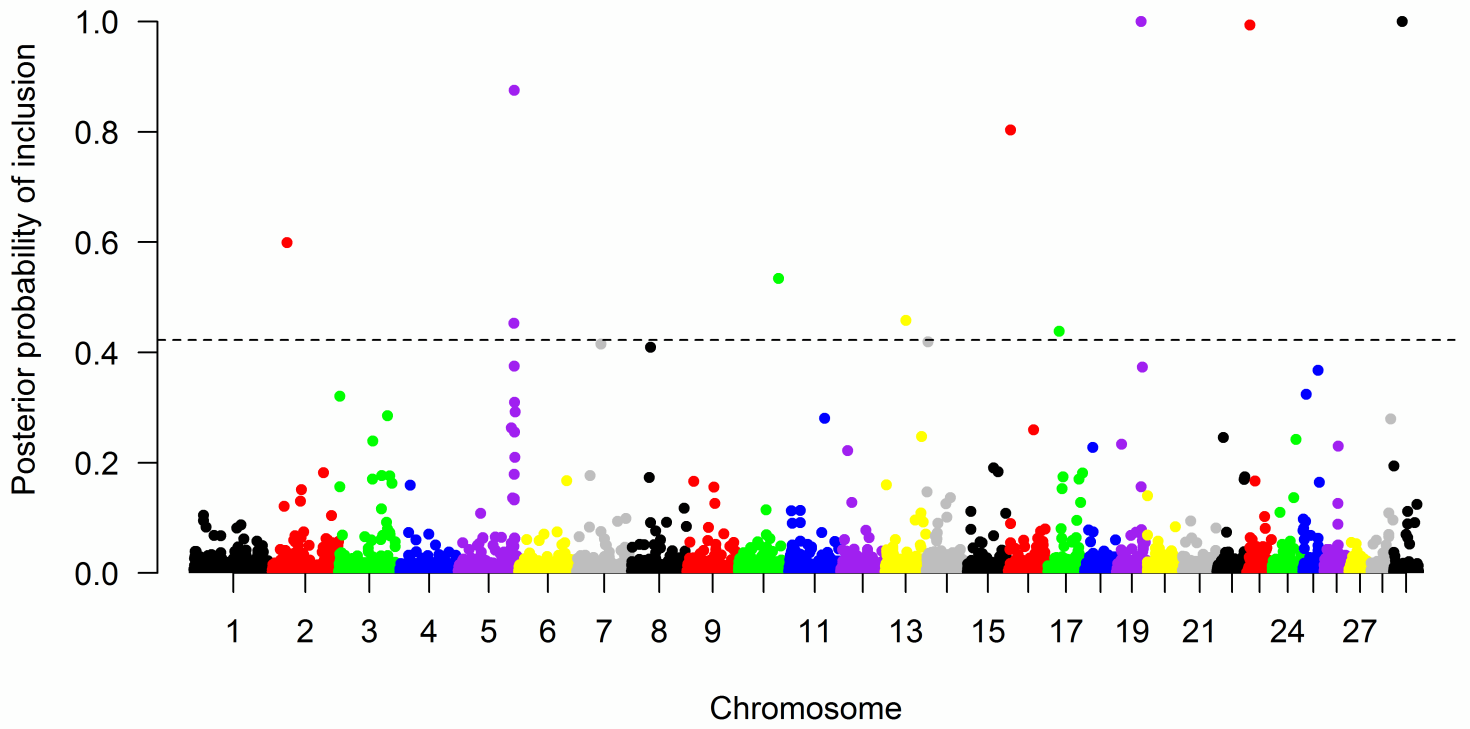

### 12:0 in SQ

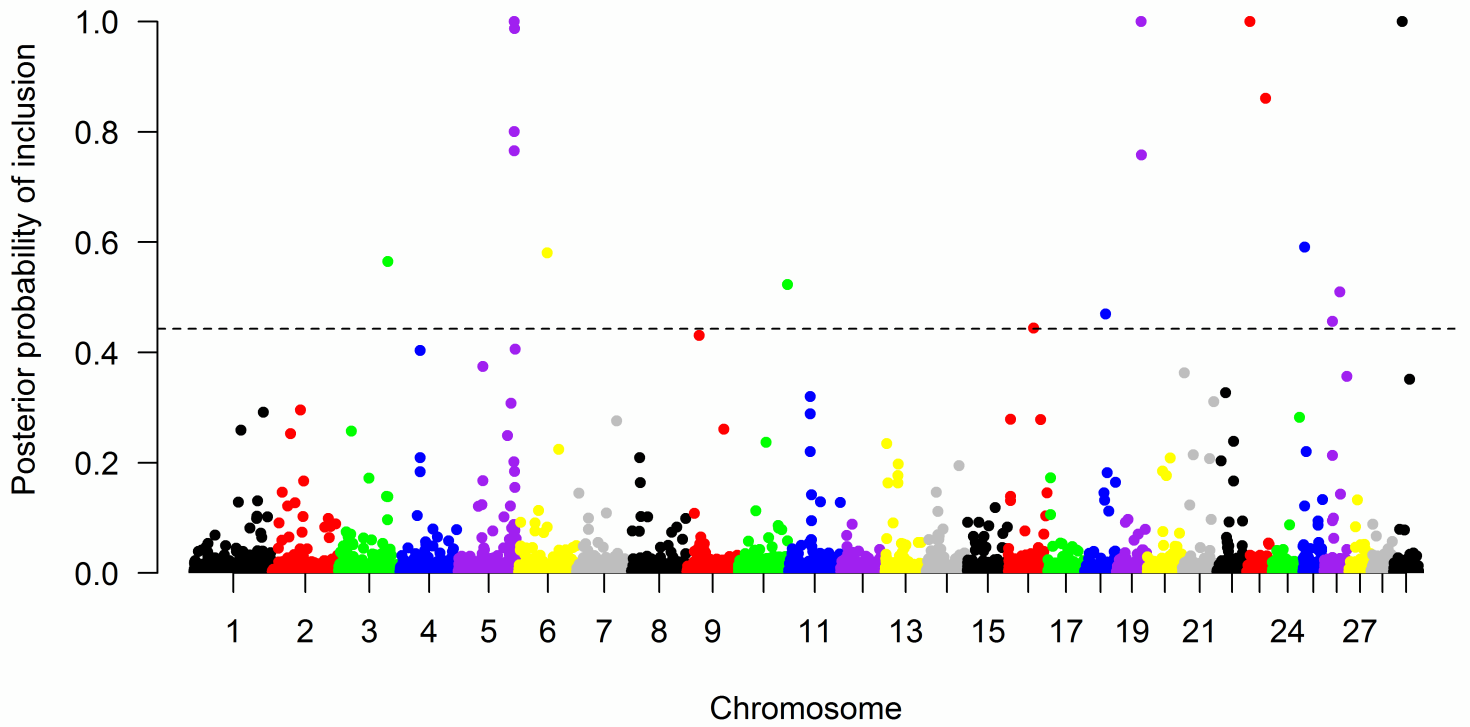

### 13:0 in LL

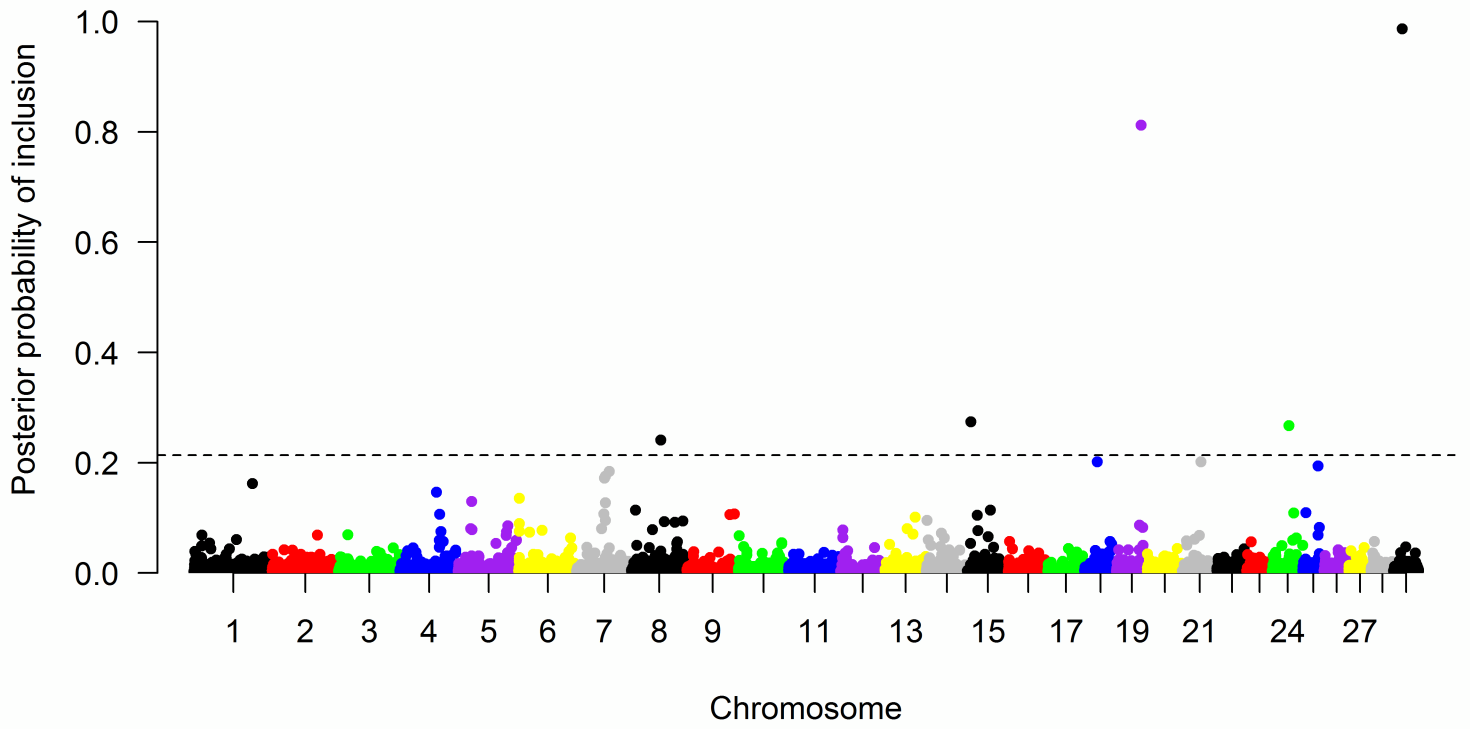

### 13:0 in SQ

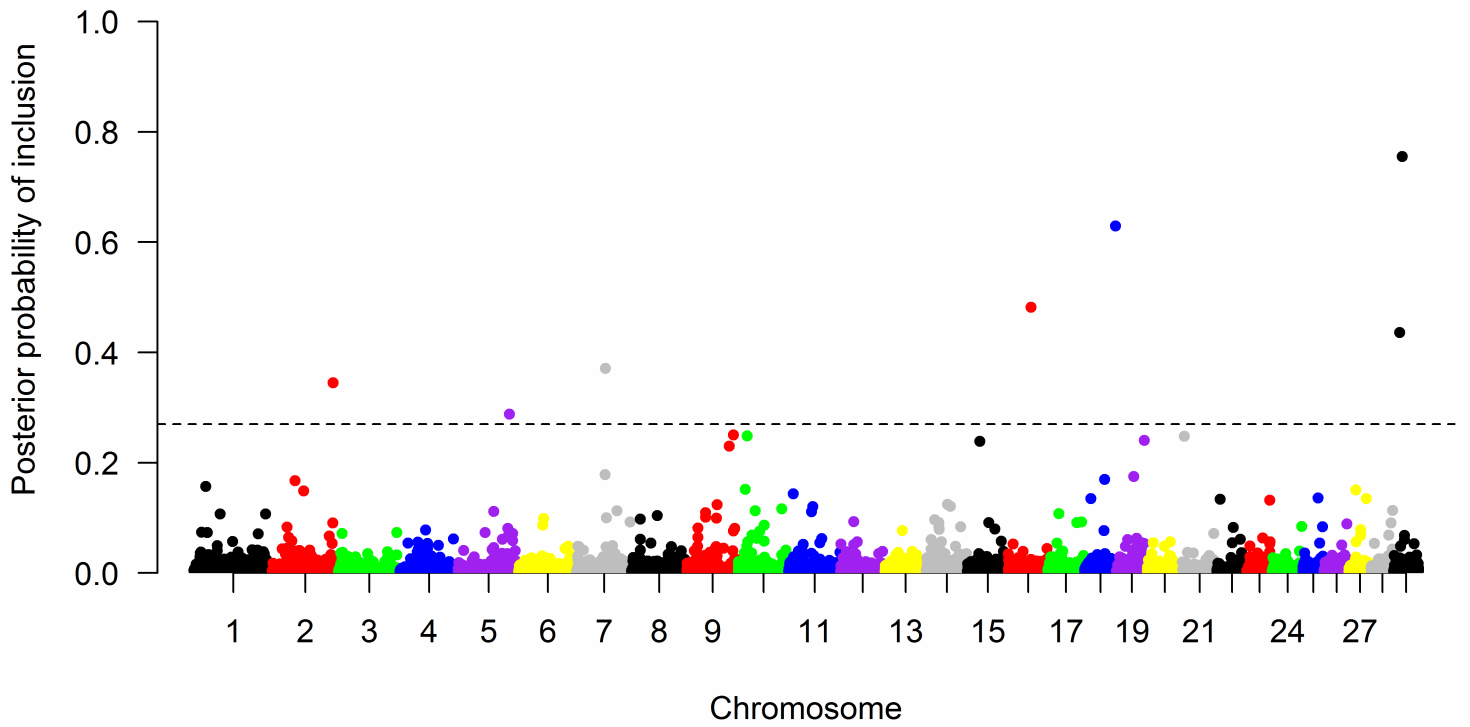

### 14:0 in LL

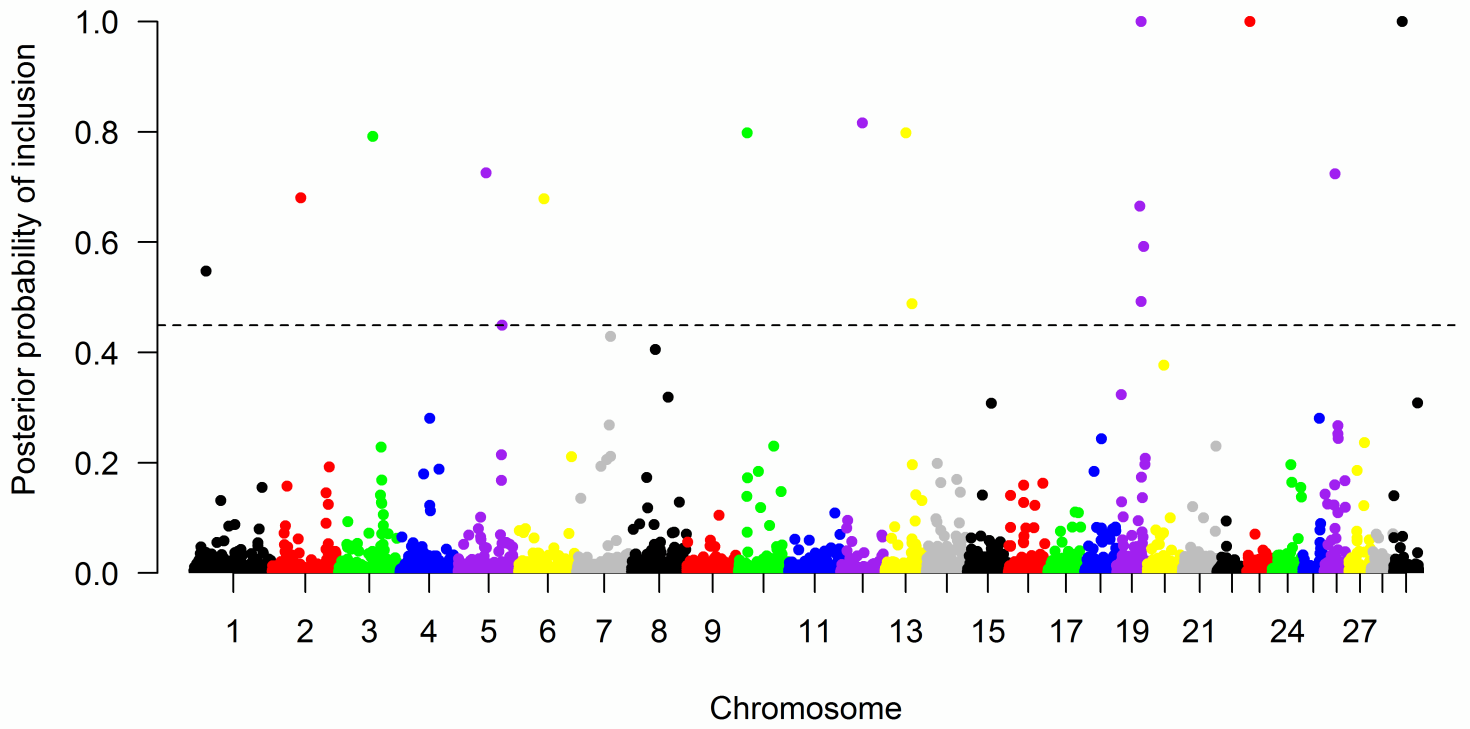

### 14:0 in SQ

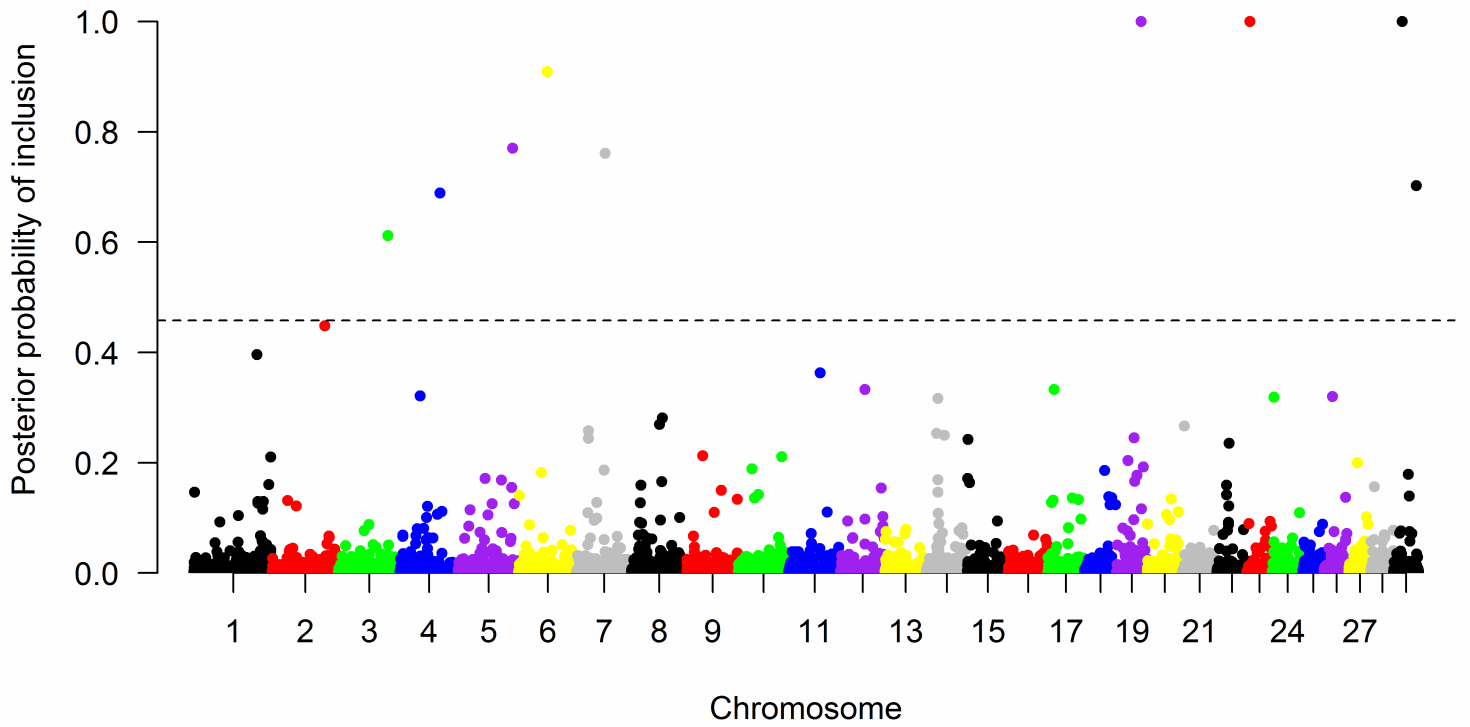

### 15:0 in LL

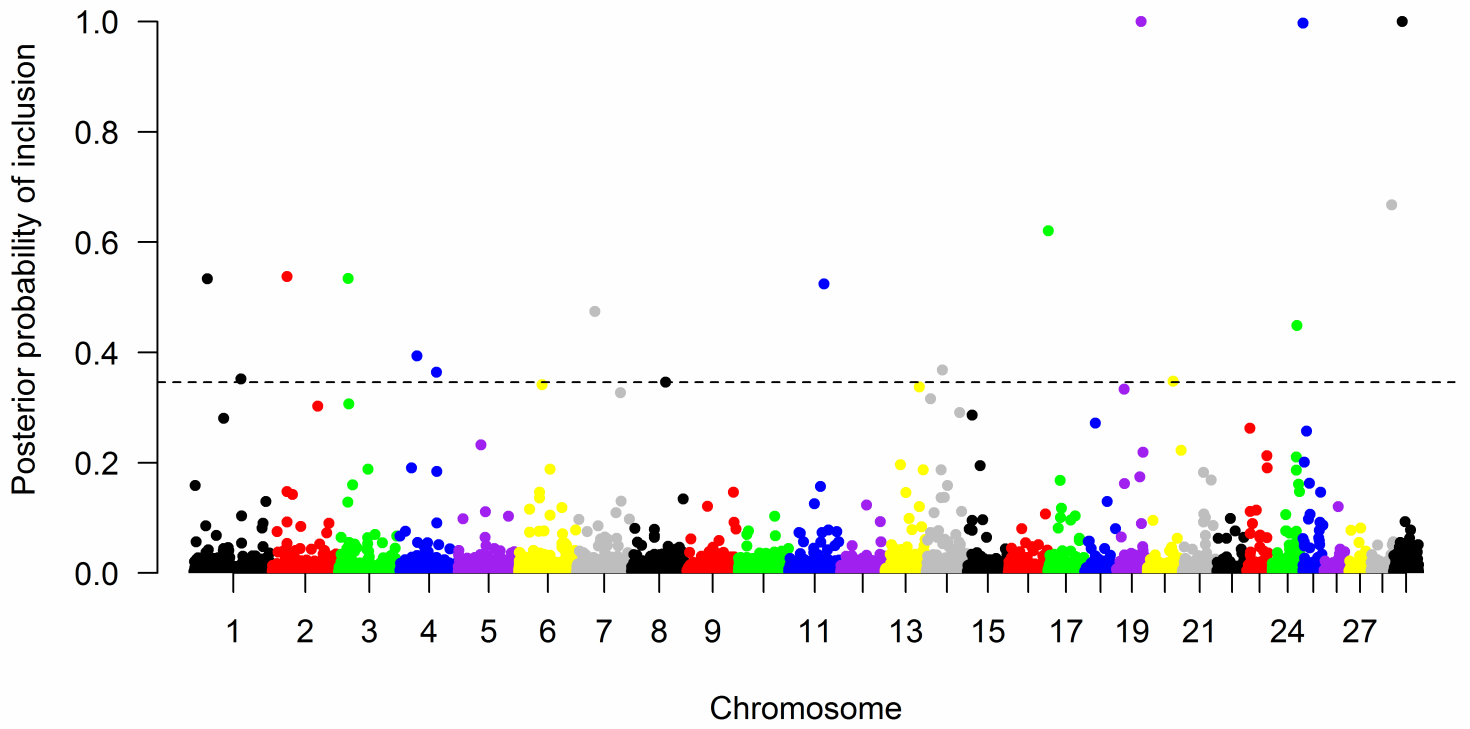

### 15:0 in SQ

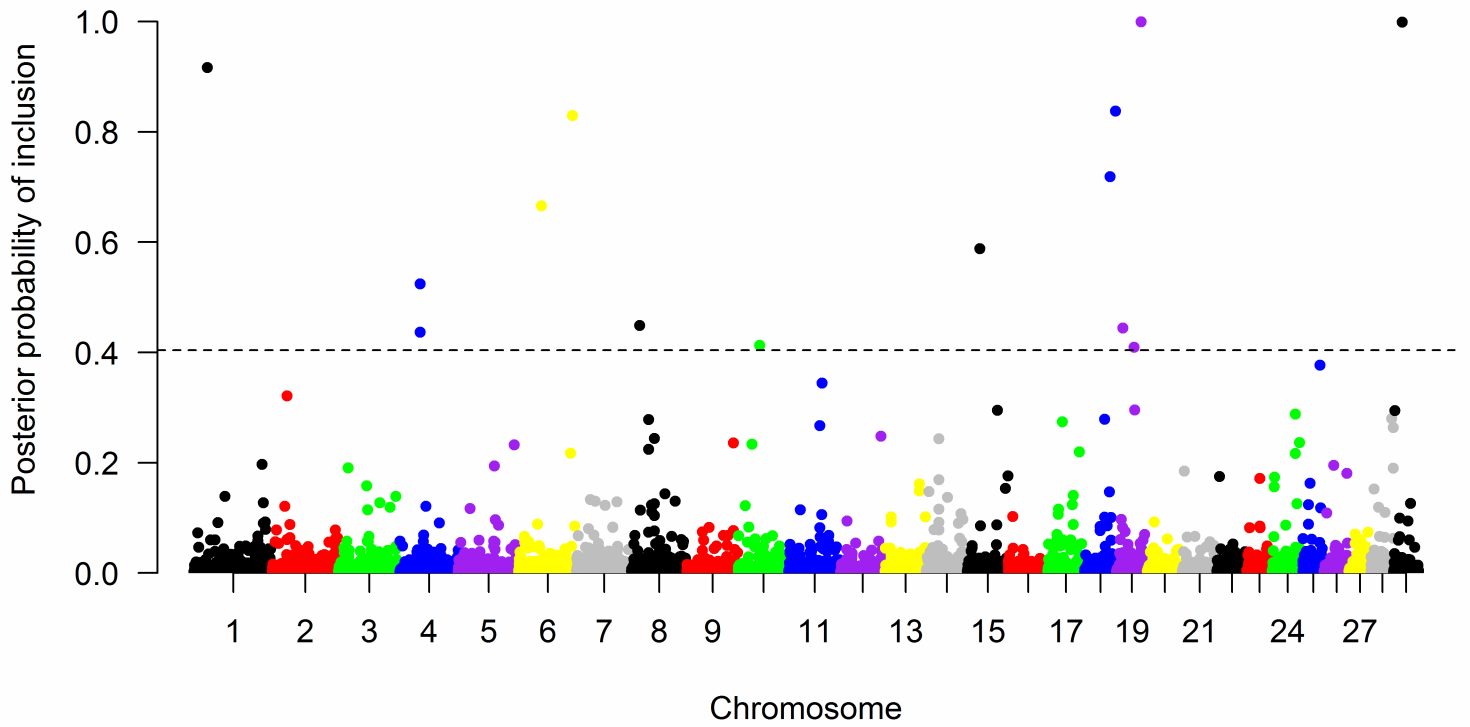

### 16:0 in LL

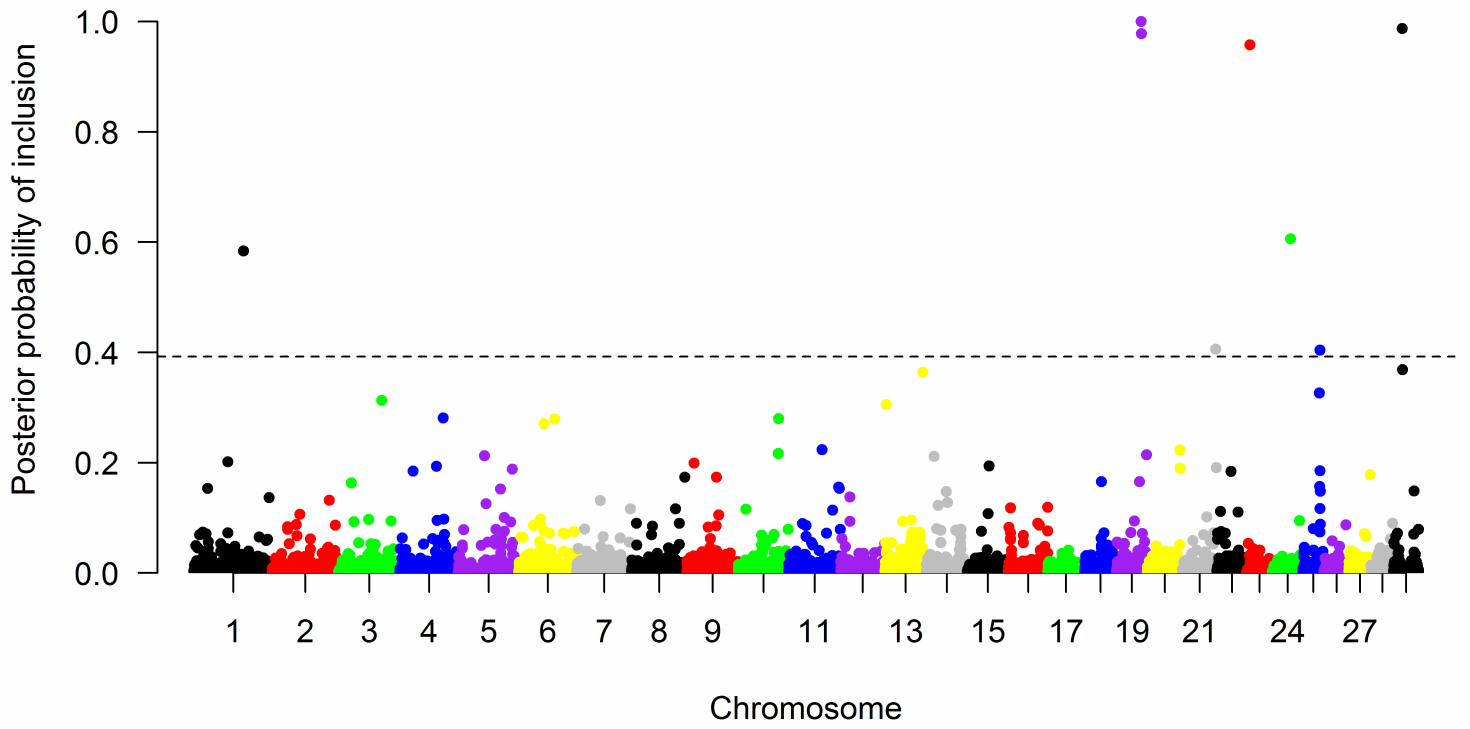

### 16:0 in SQ

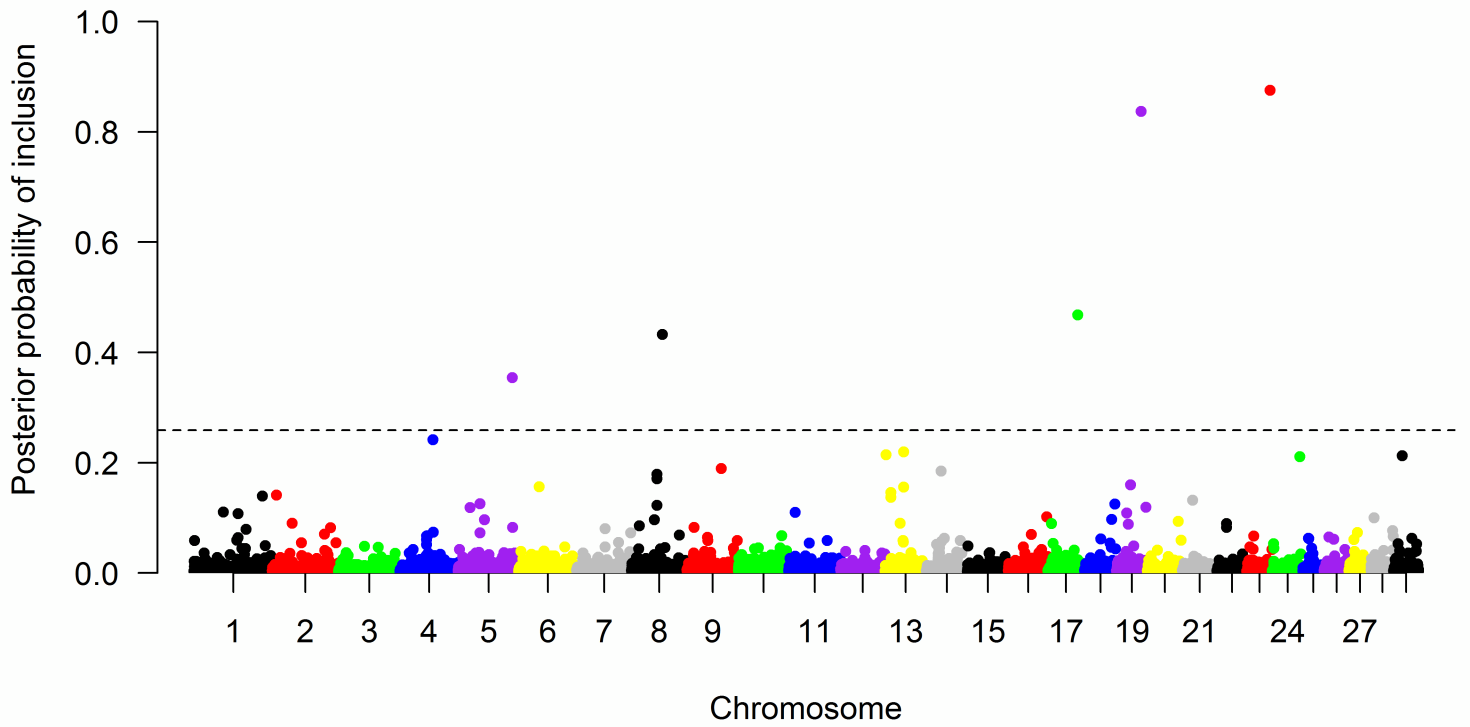

### 17:0 in LL

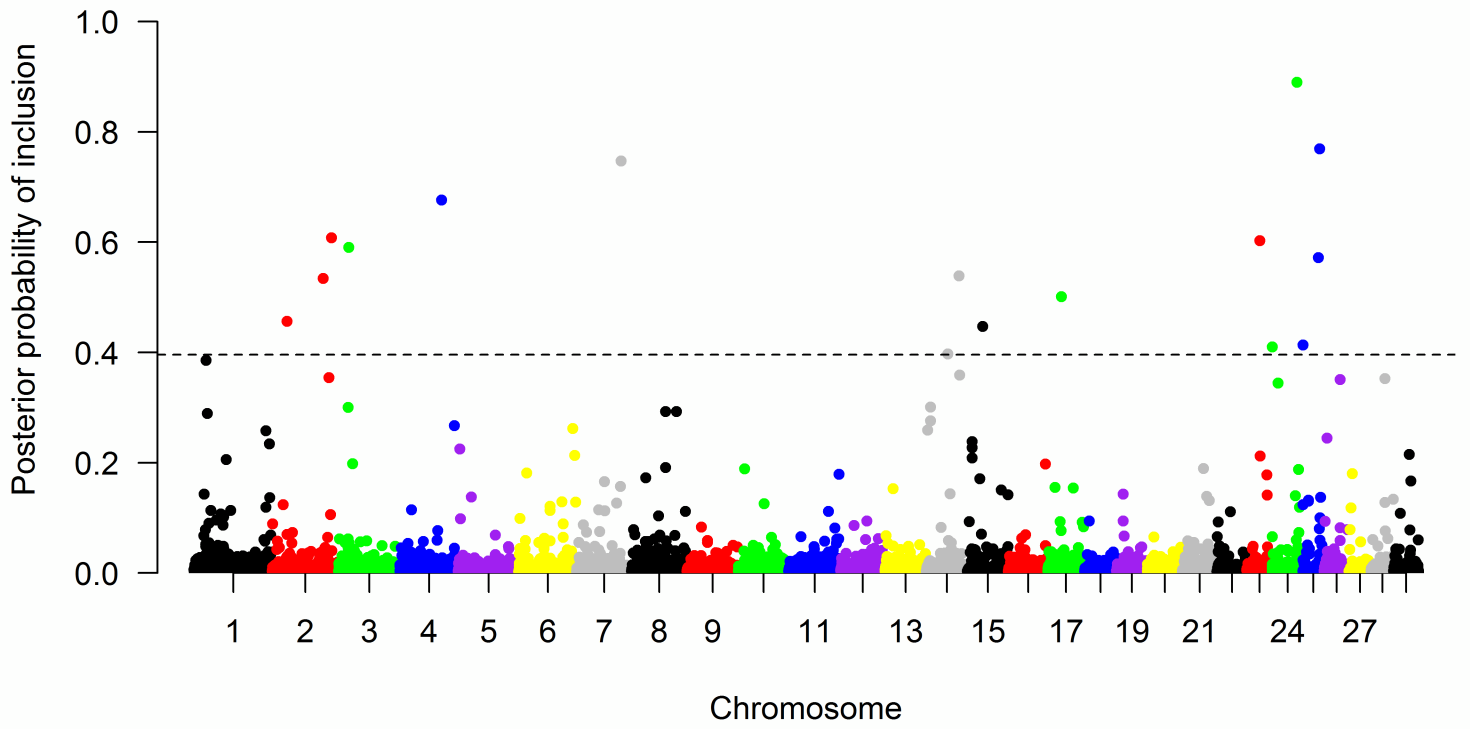

### 17:0 in SQ

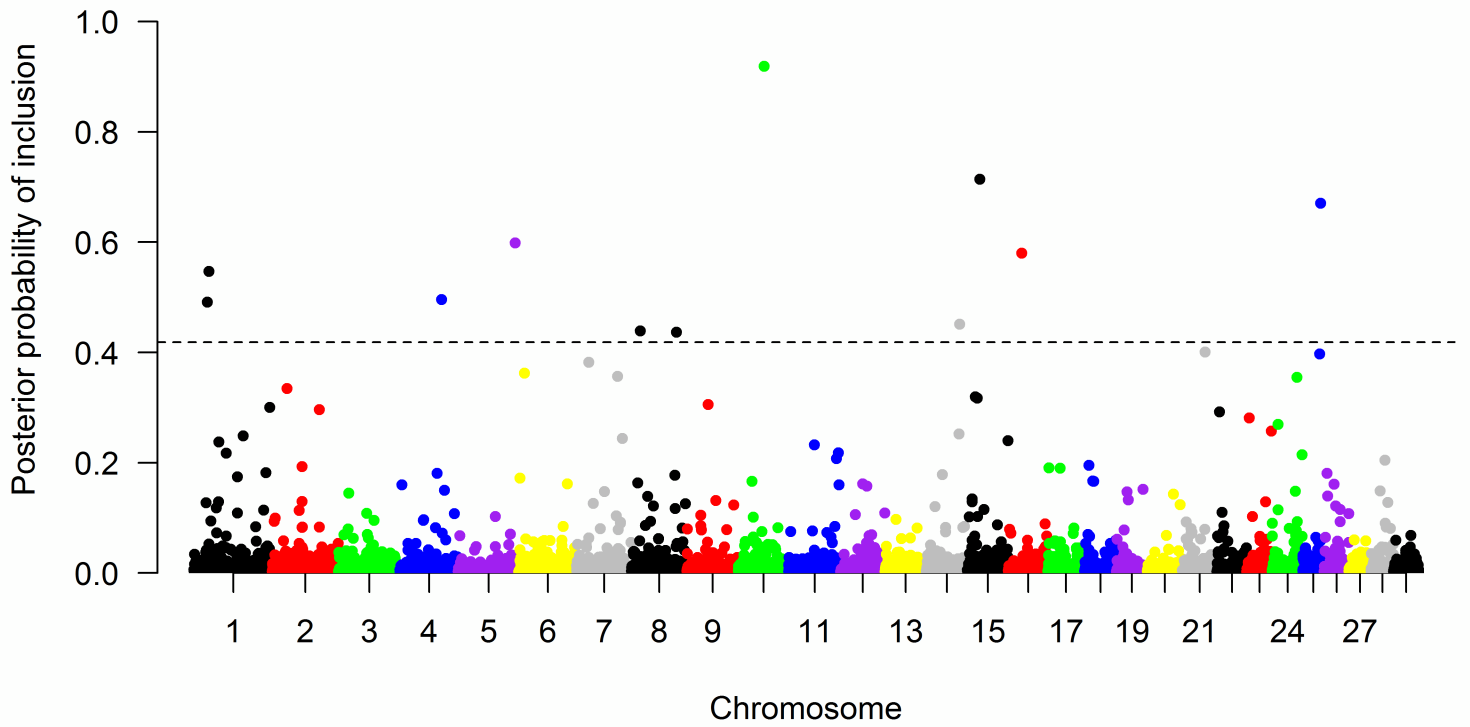

### 18:0 in LL

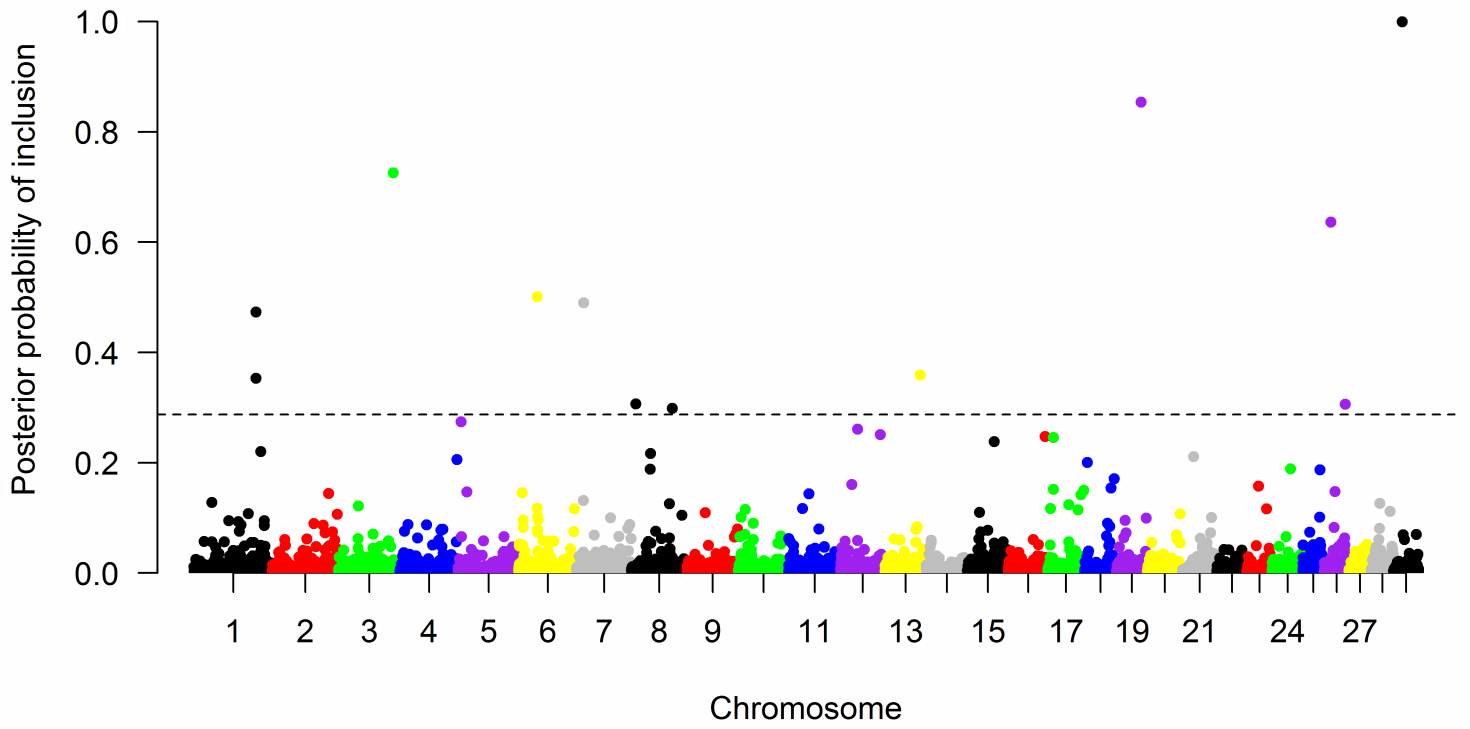

### 18:0 in SQ

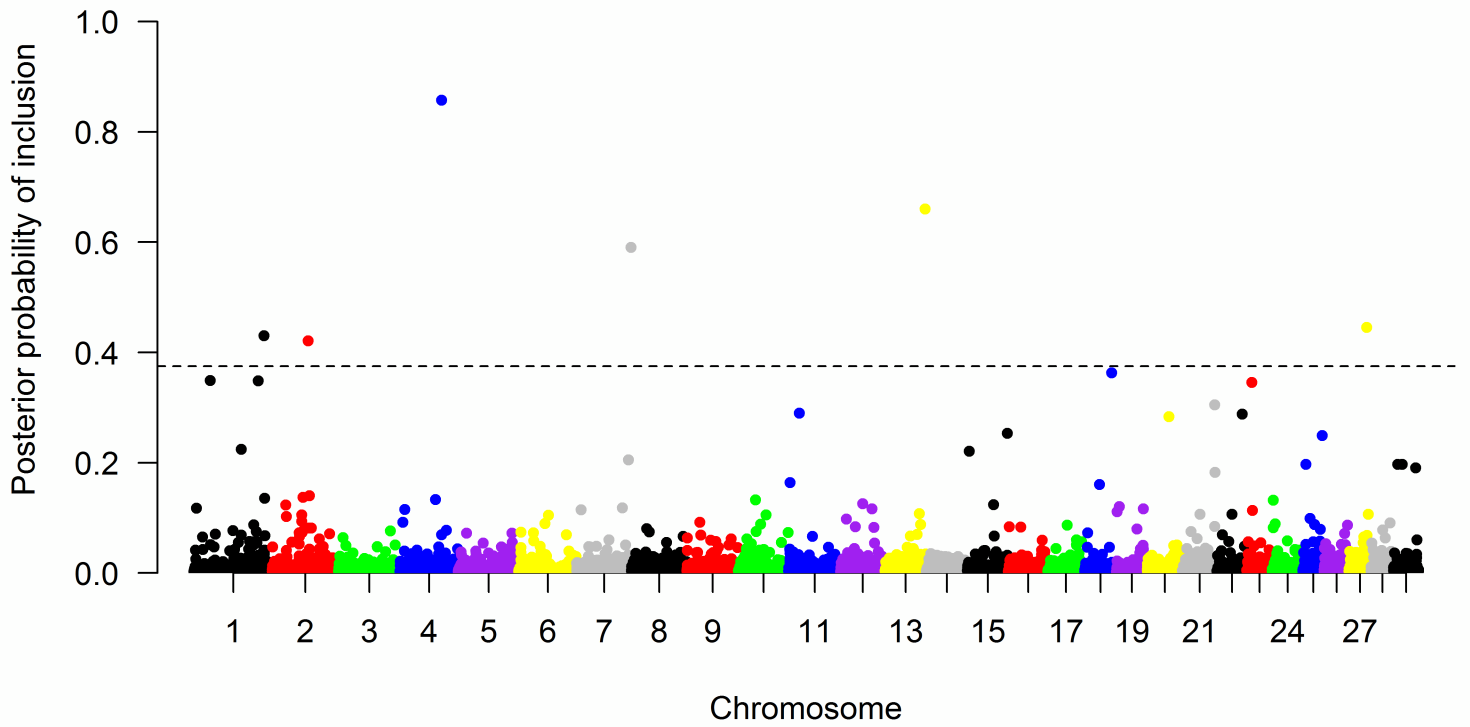



### 19:0 in LL

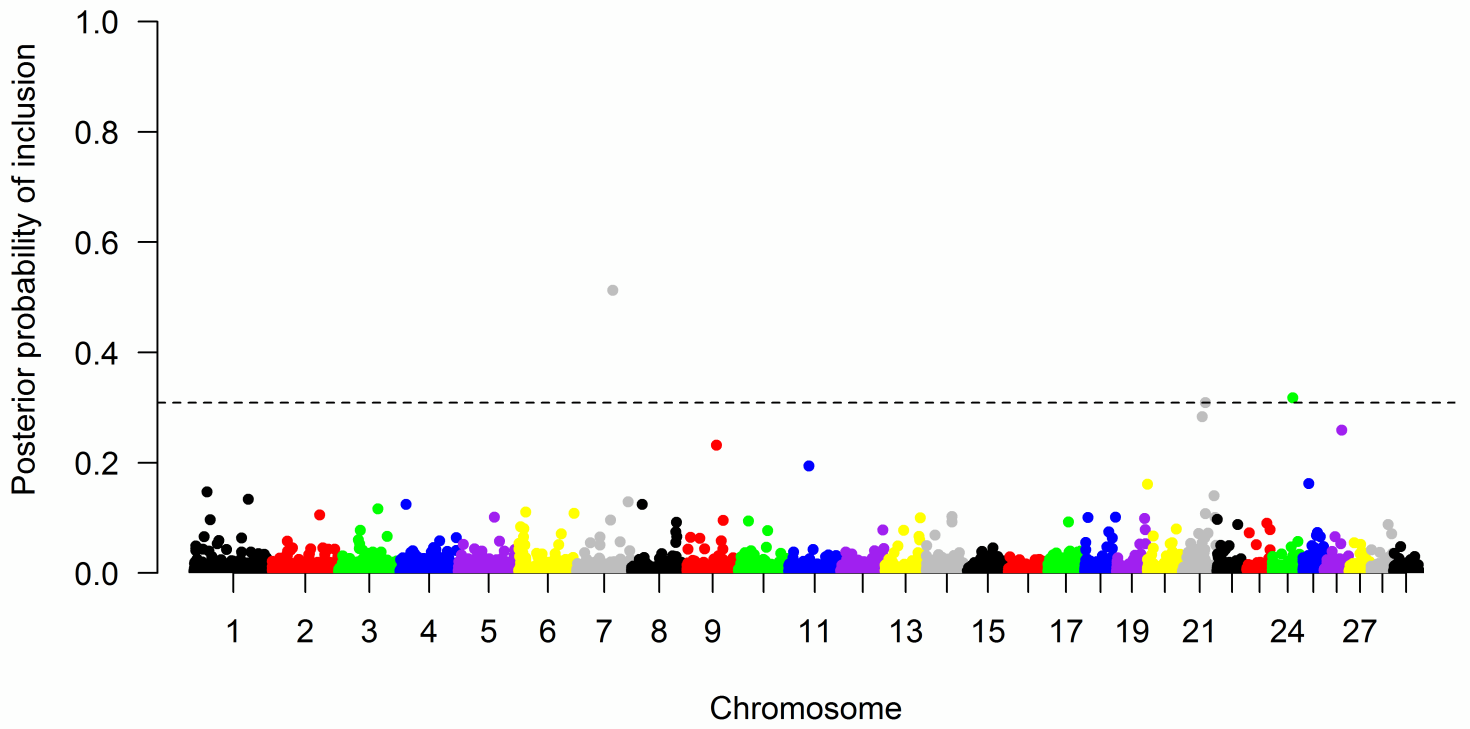

### 19:0 in SQ

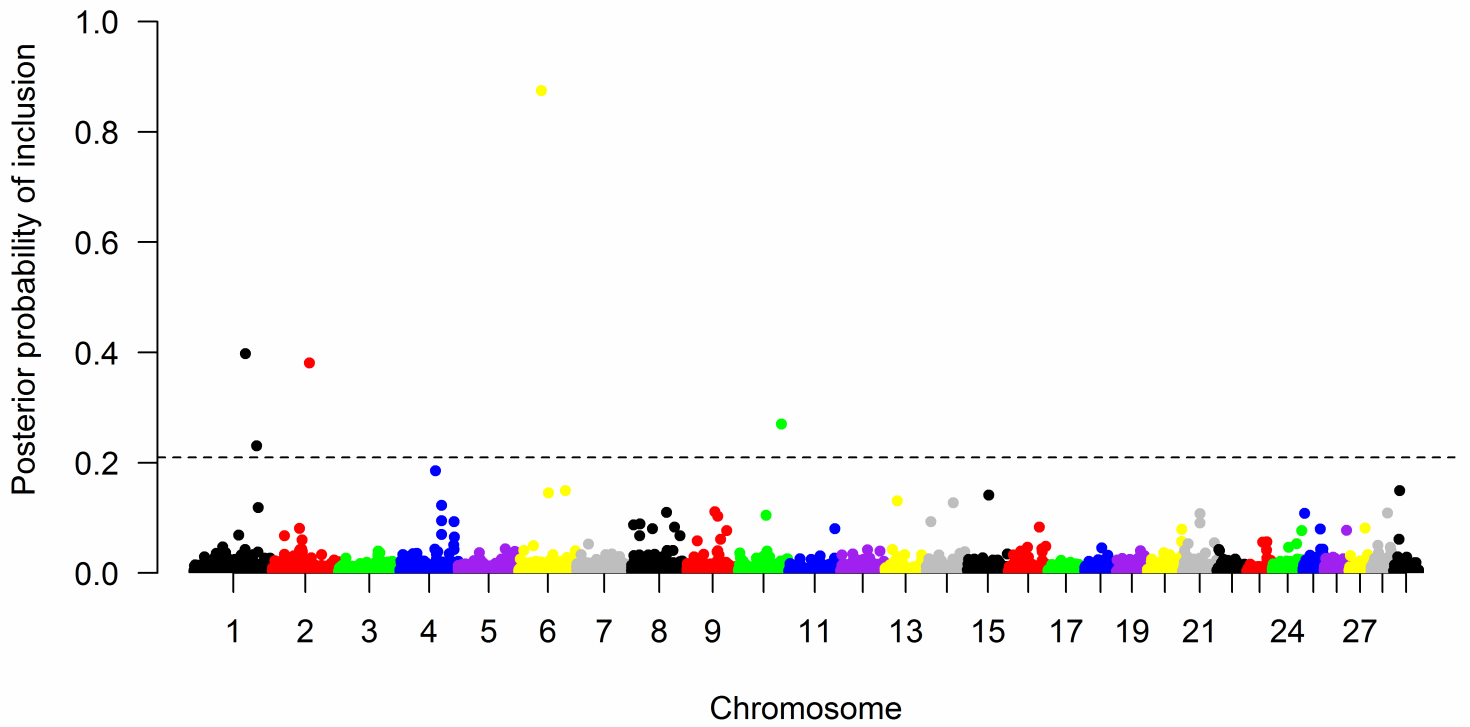

### 20:0 in LL

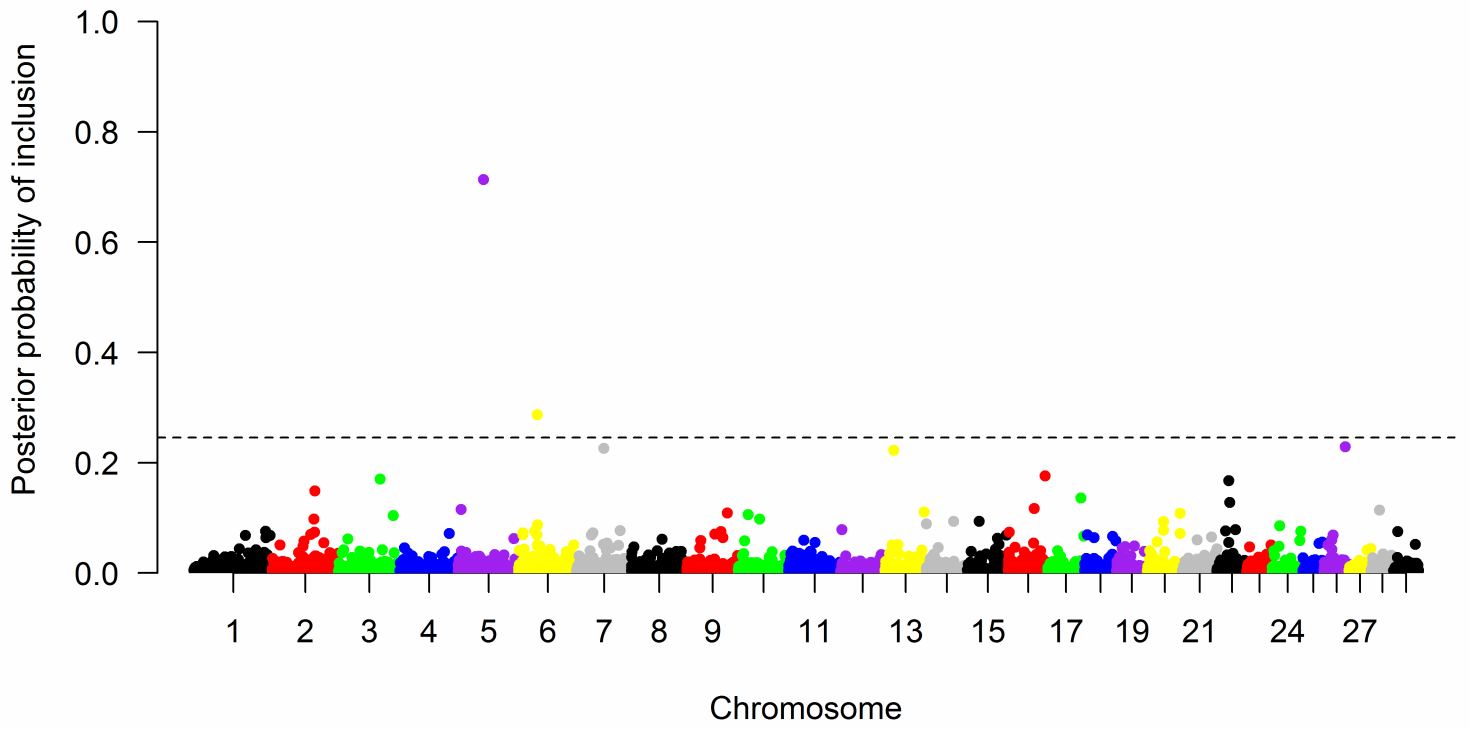

### 20:0 in SQ

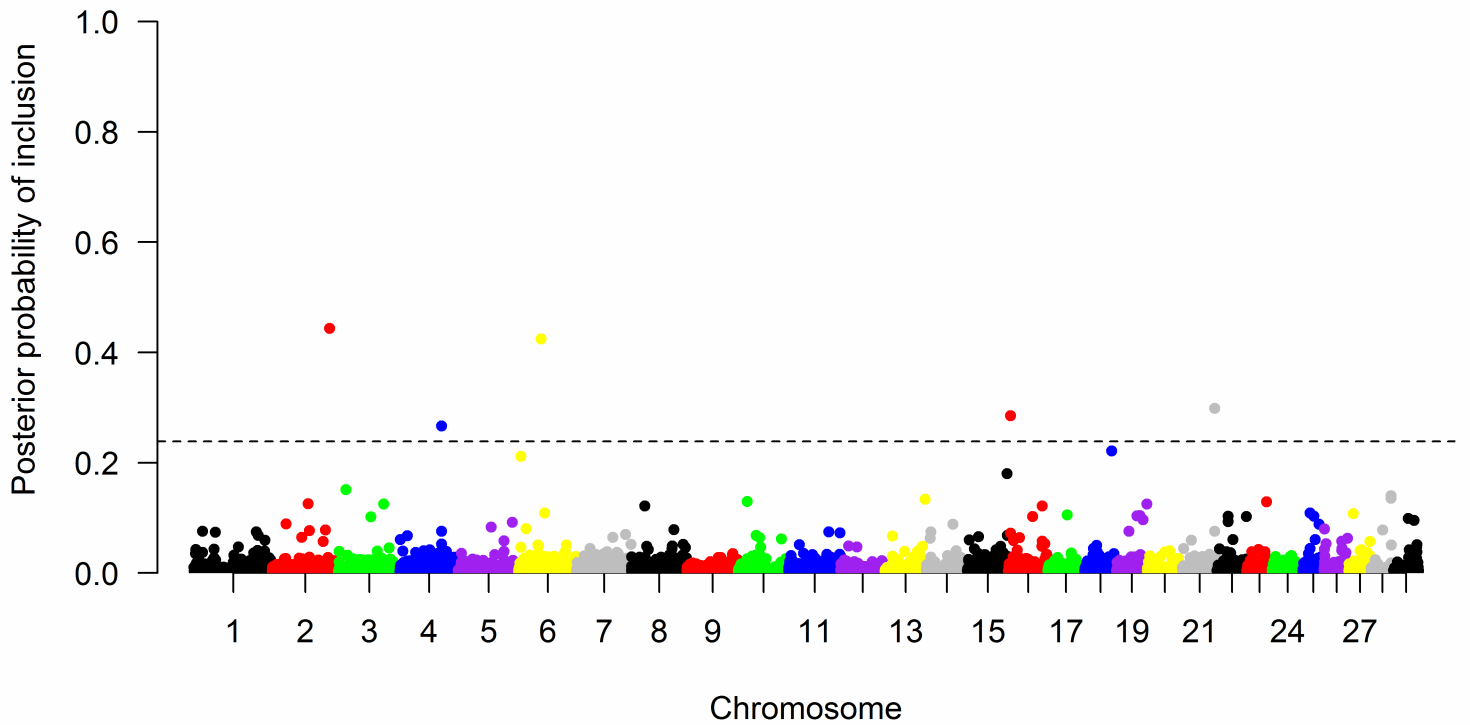

### 22:0 in LL

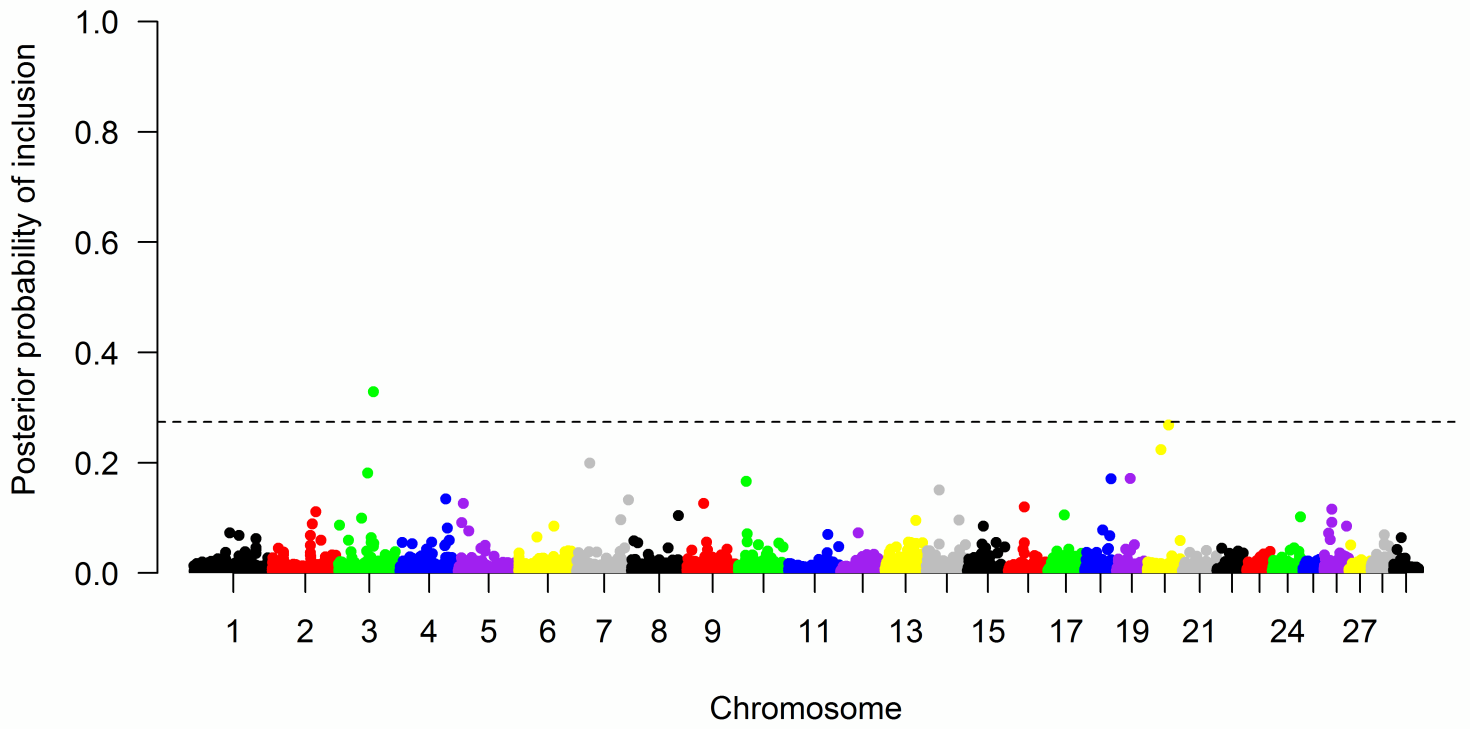

### 22:0 in SQ

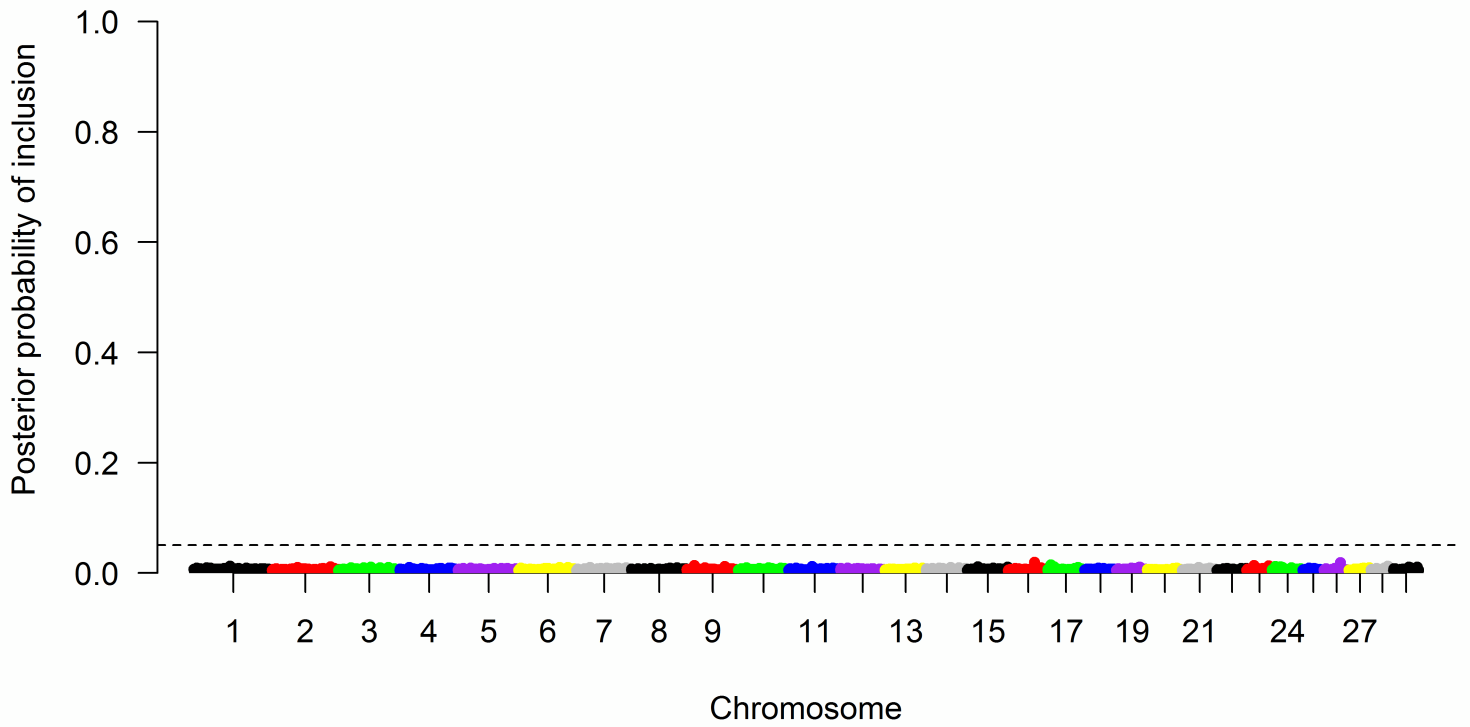

### 24:0 in LL

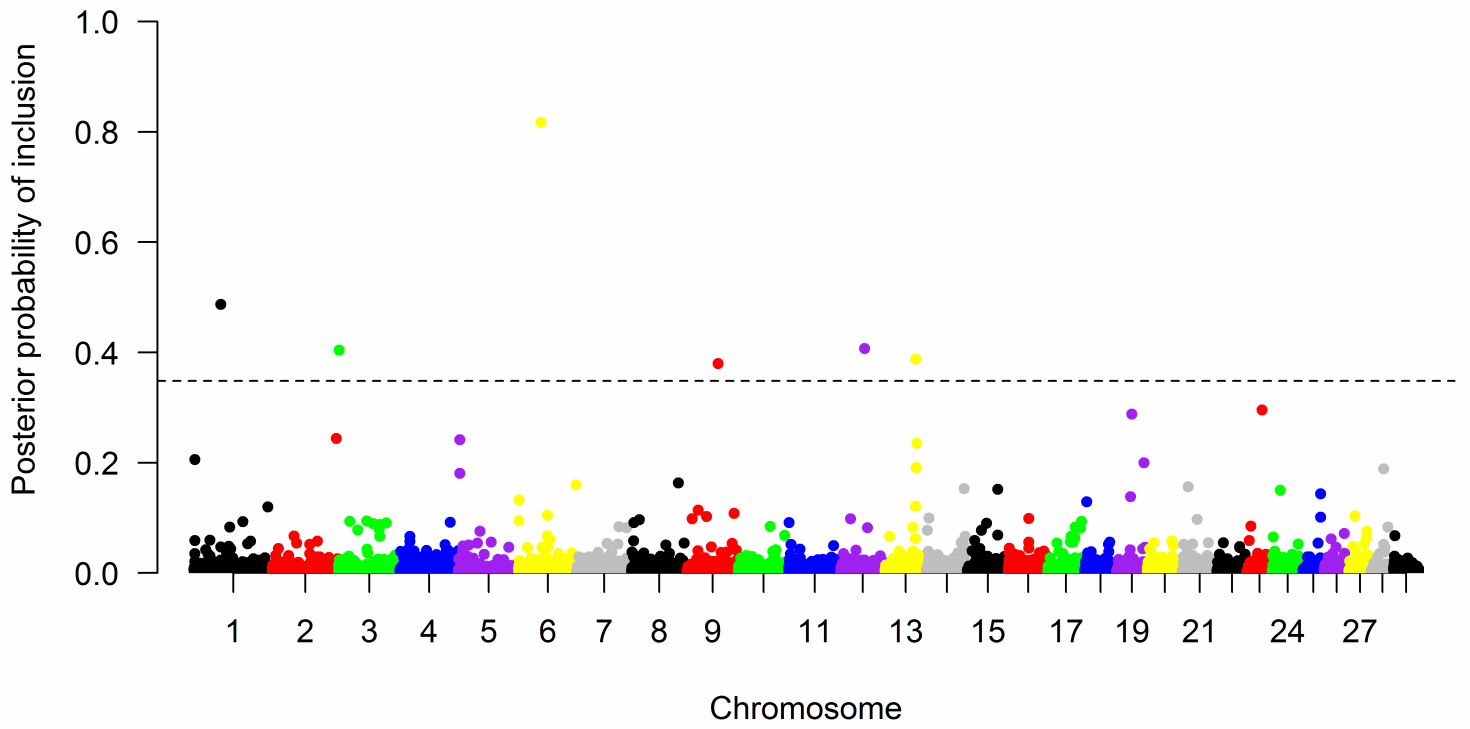

### 24:0 in SQ

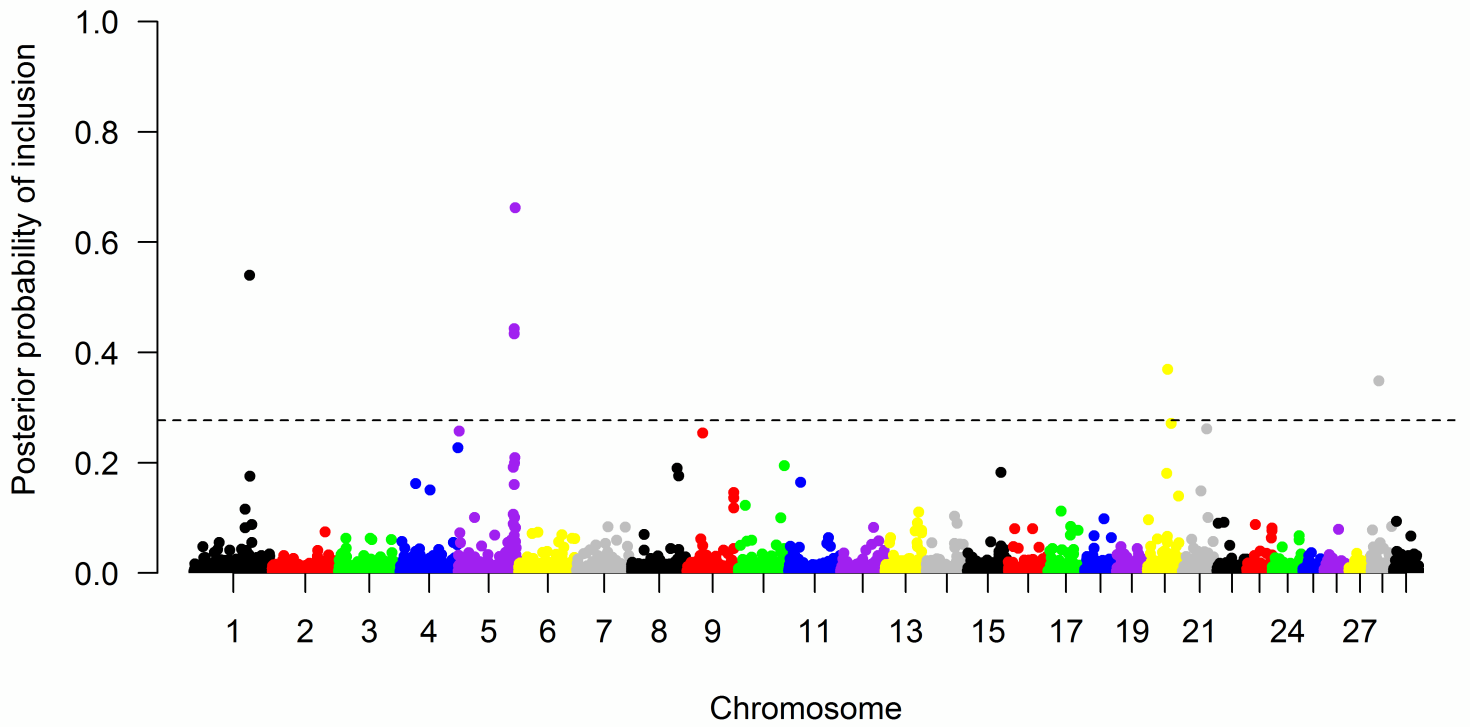

### SFA in LL

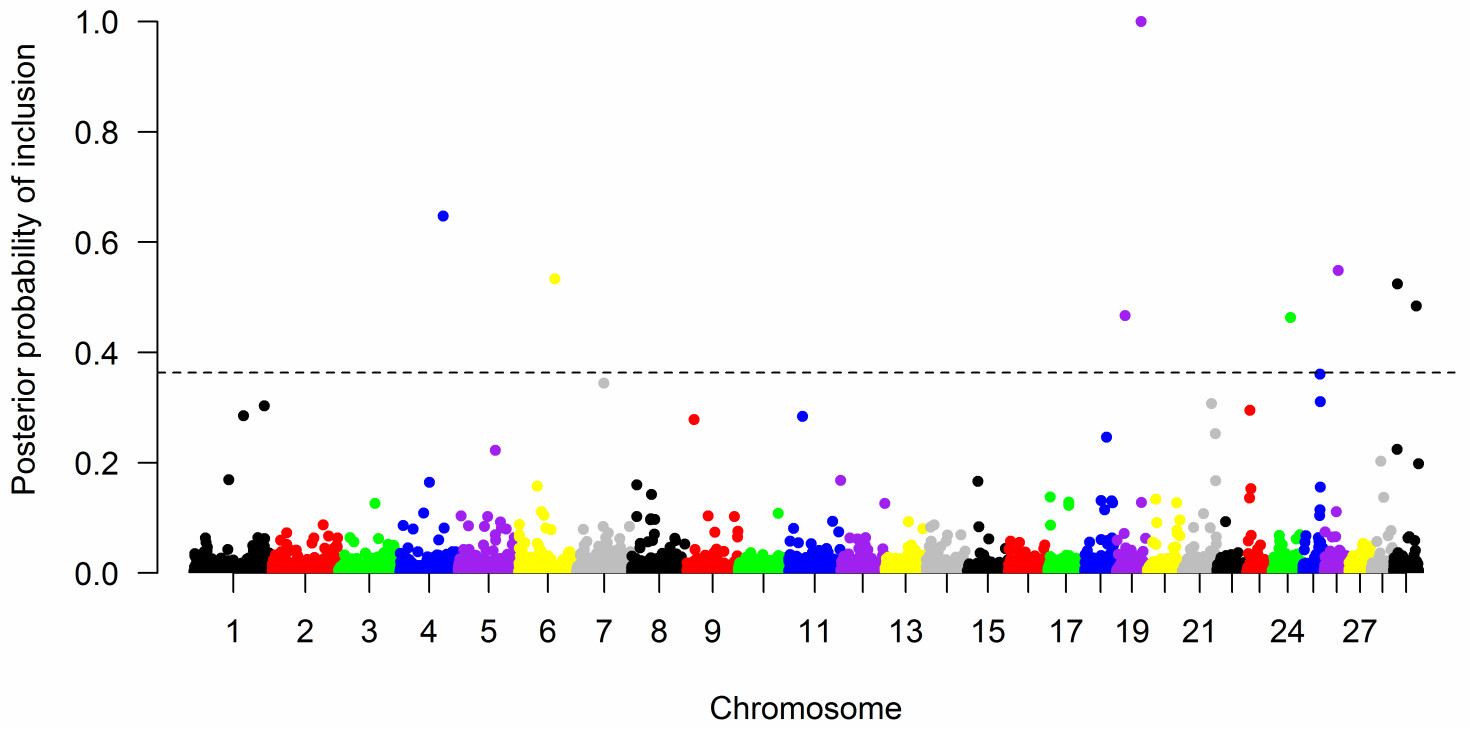

### SFA in SQ

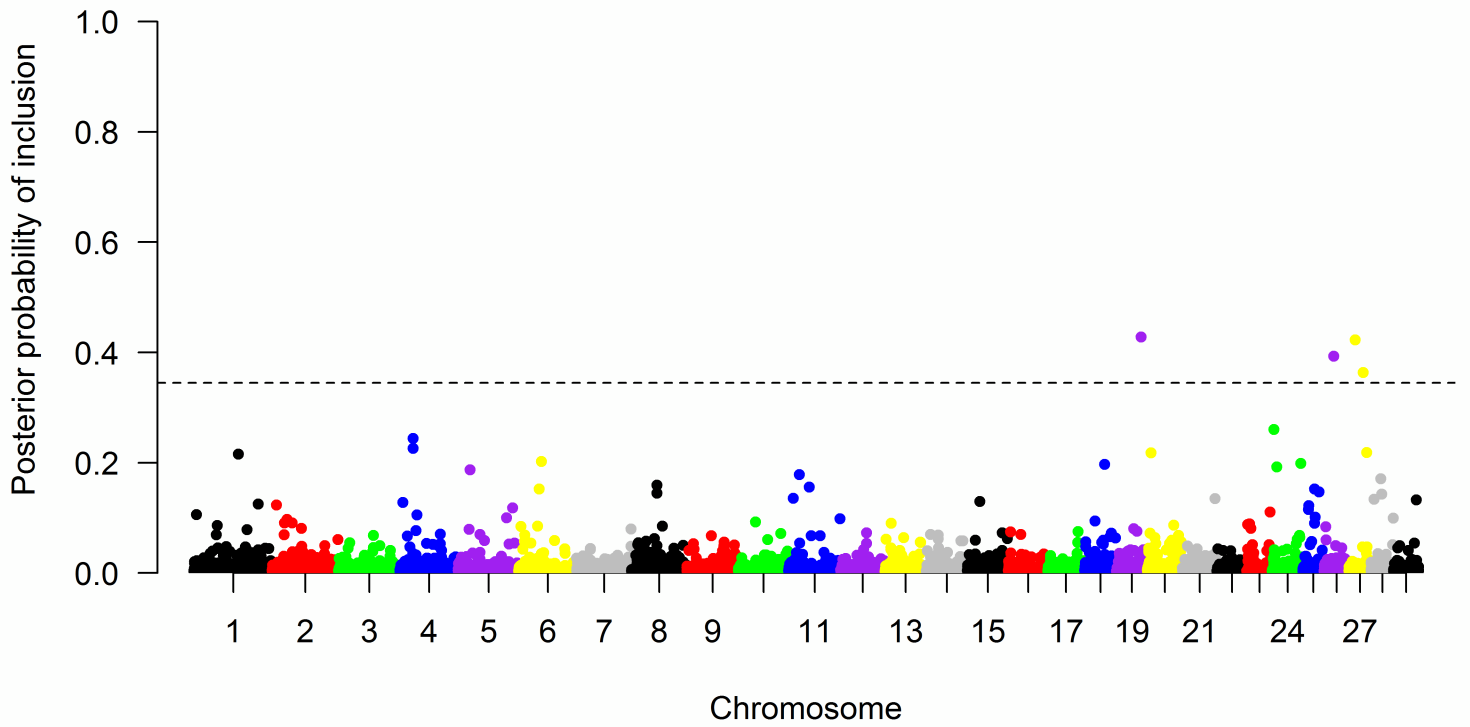

### iso14:0 in LL

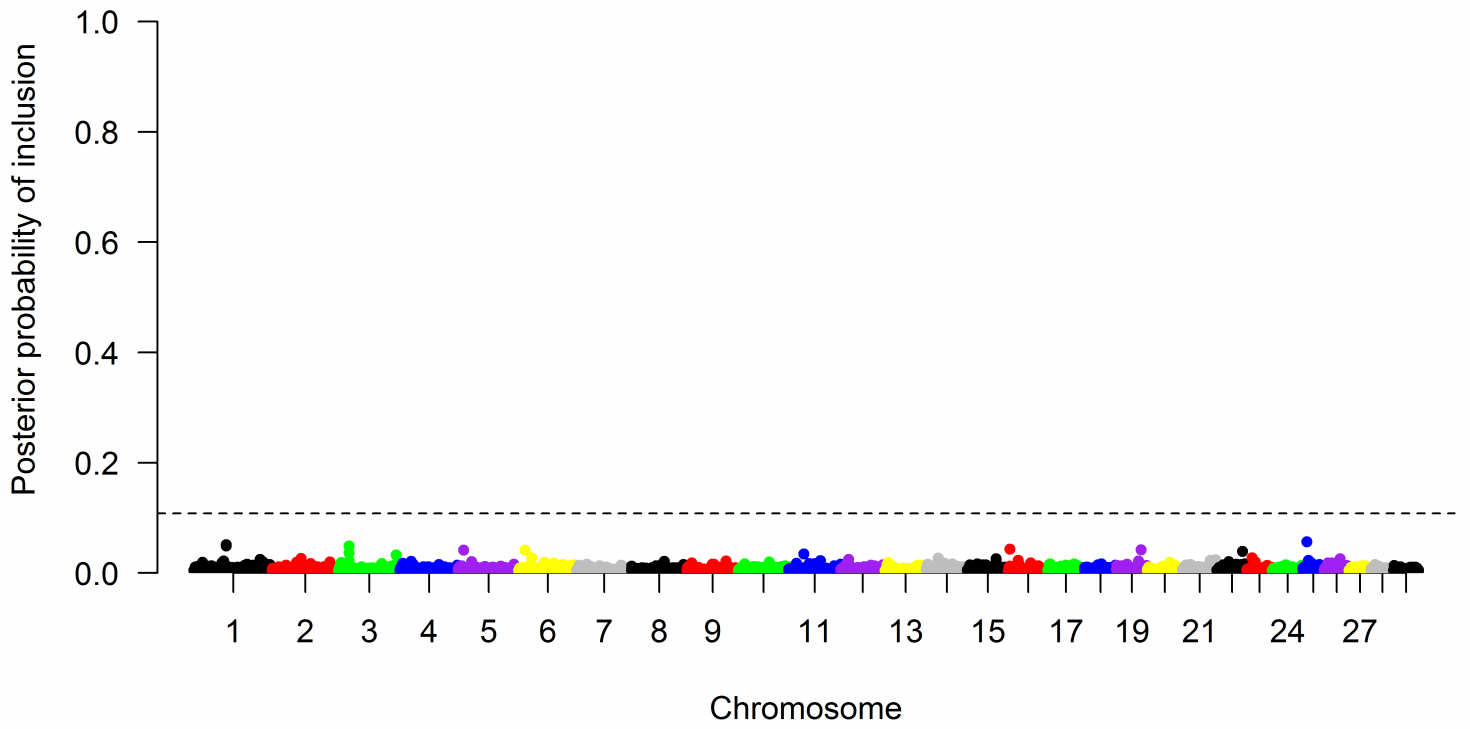

### iso14:0 in SQ

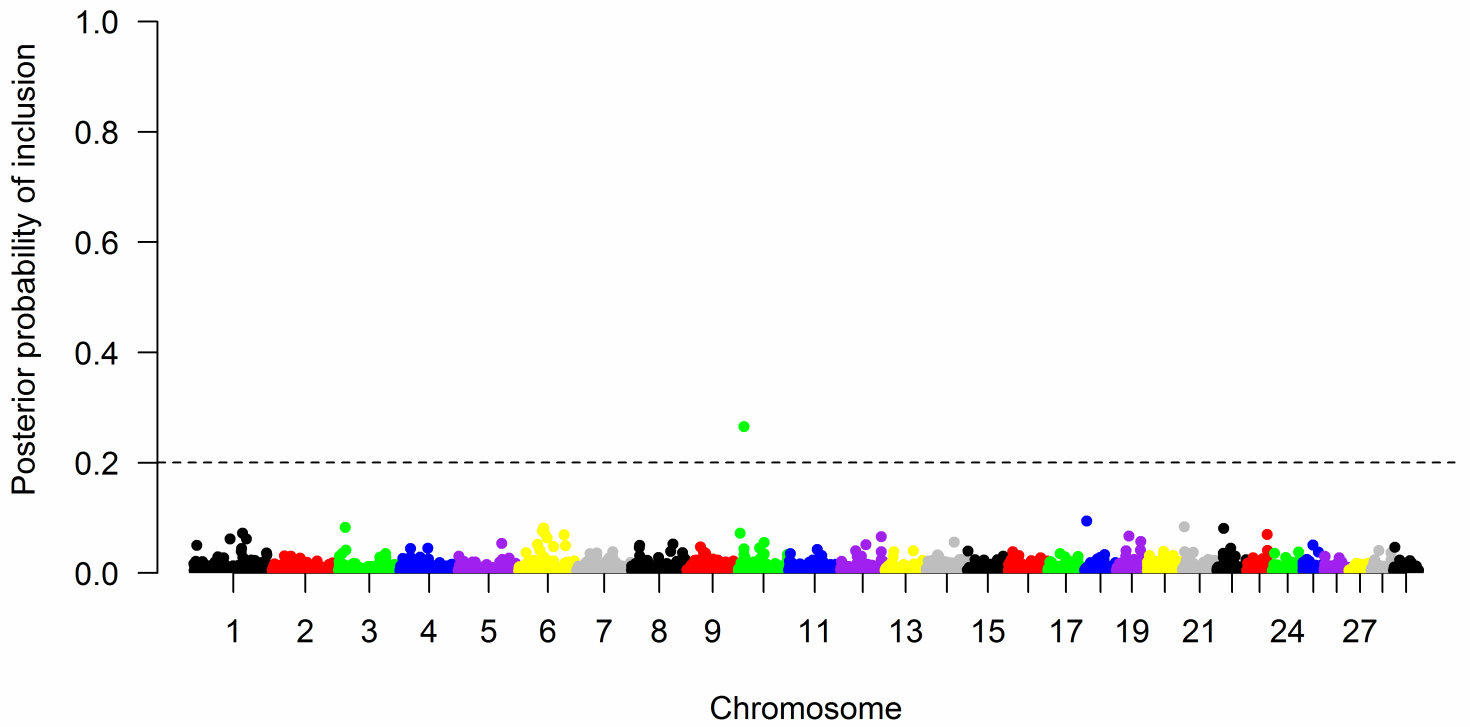

### iso15:0 in LL

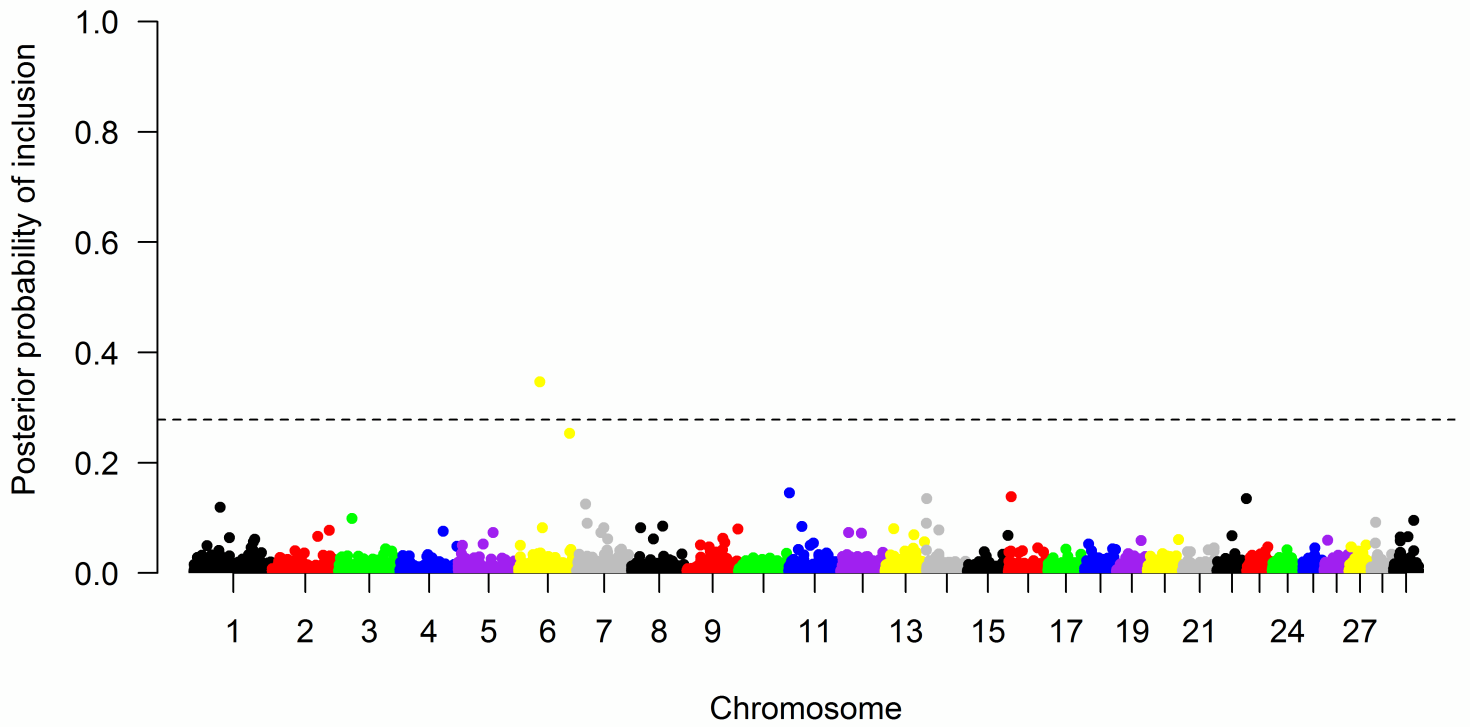

### iso15:0 in SQ

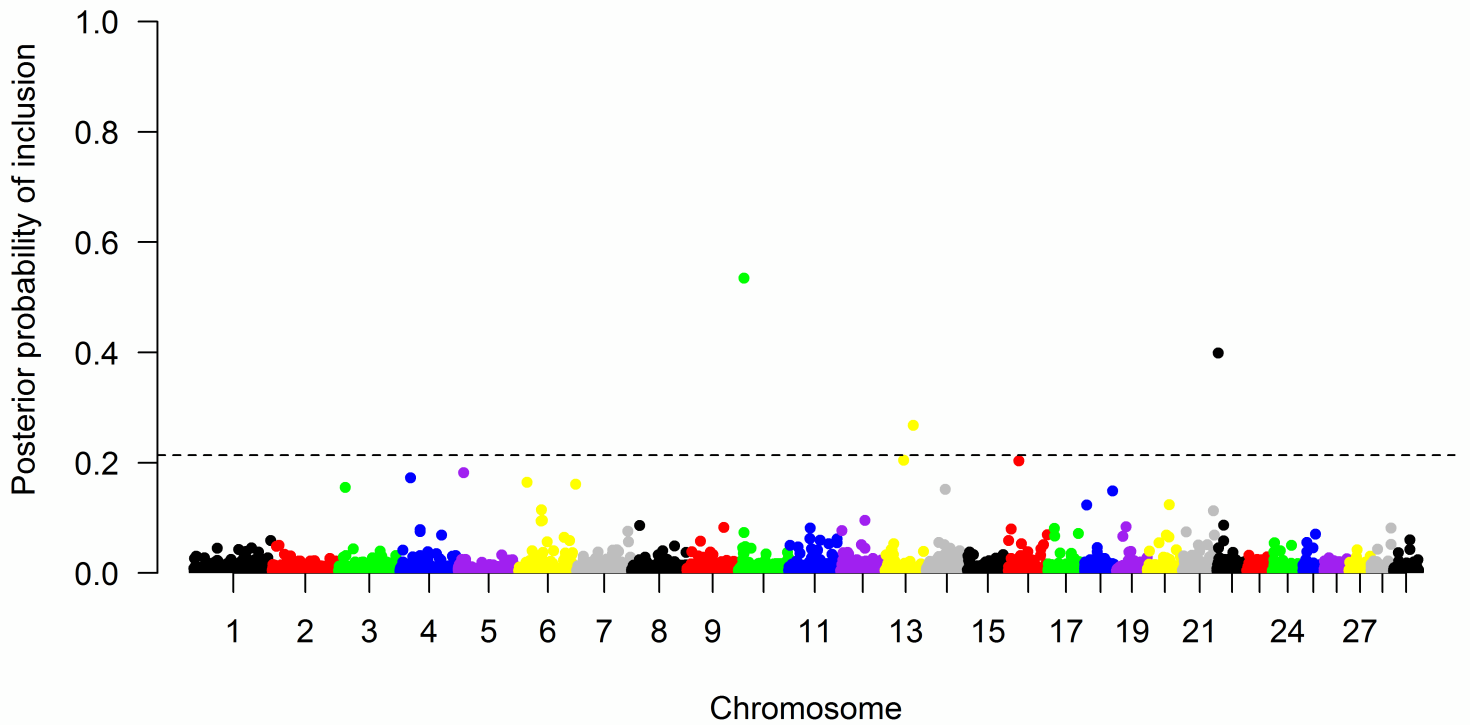

### ai15:0 in LL

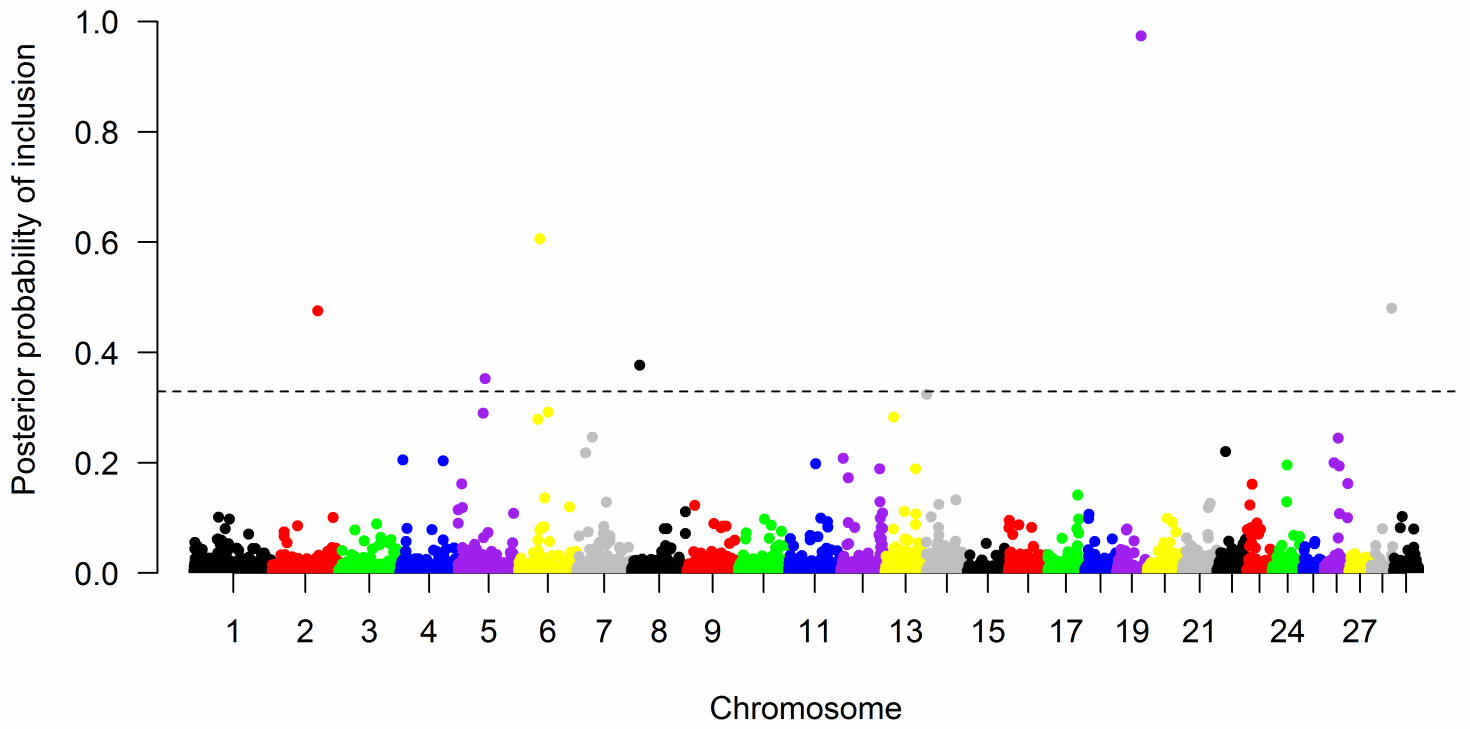

### ai15:0 in SQ

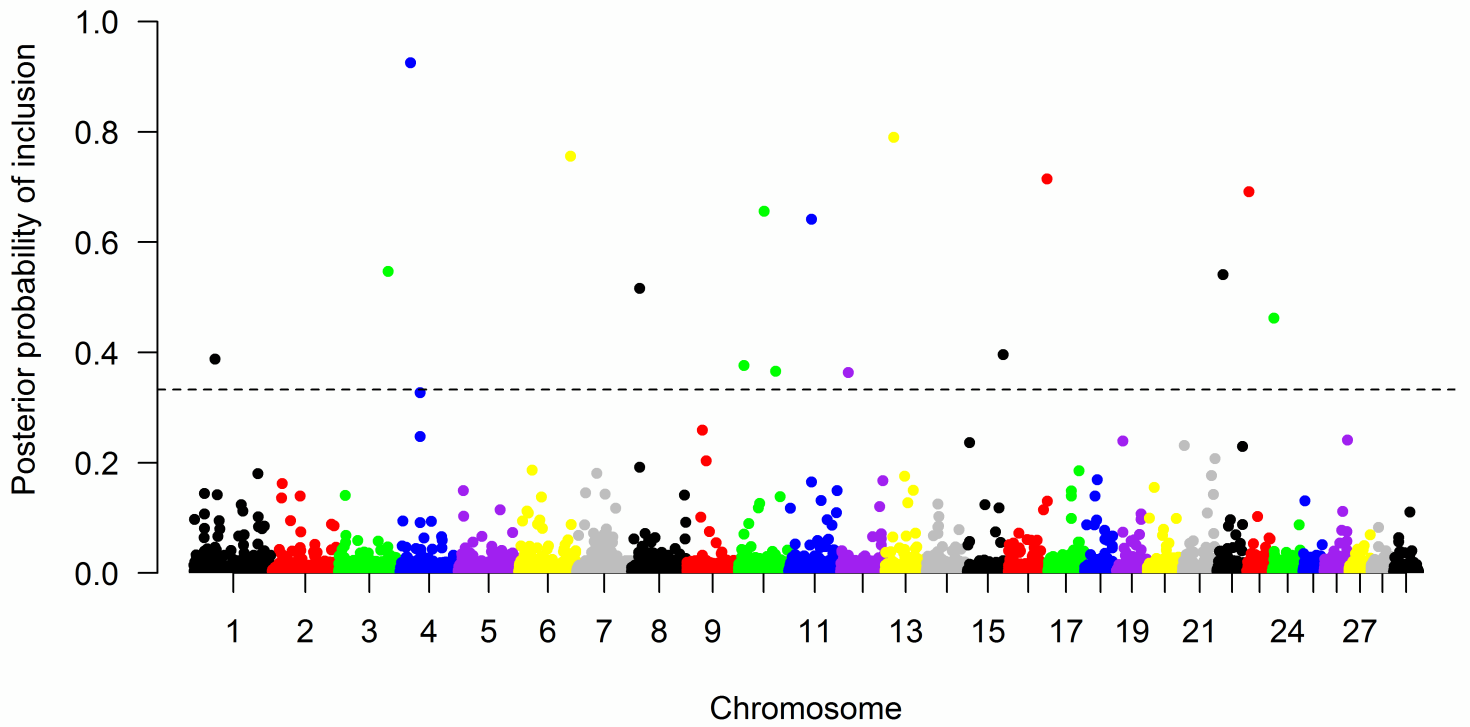



### iso16:0 in LL

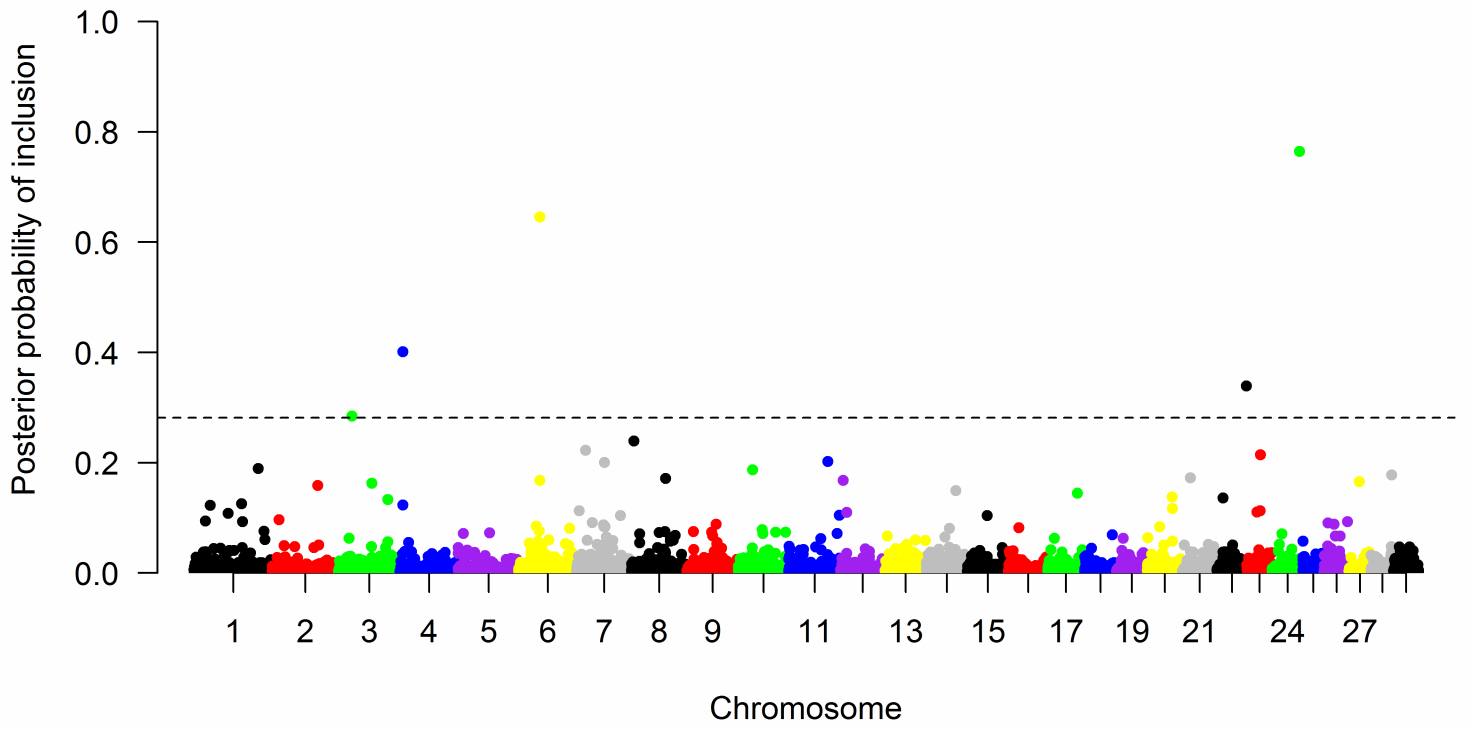

### iso16:0 in SQ

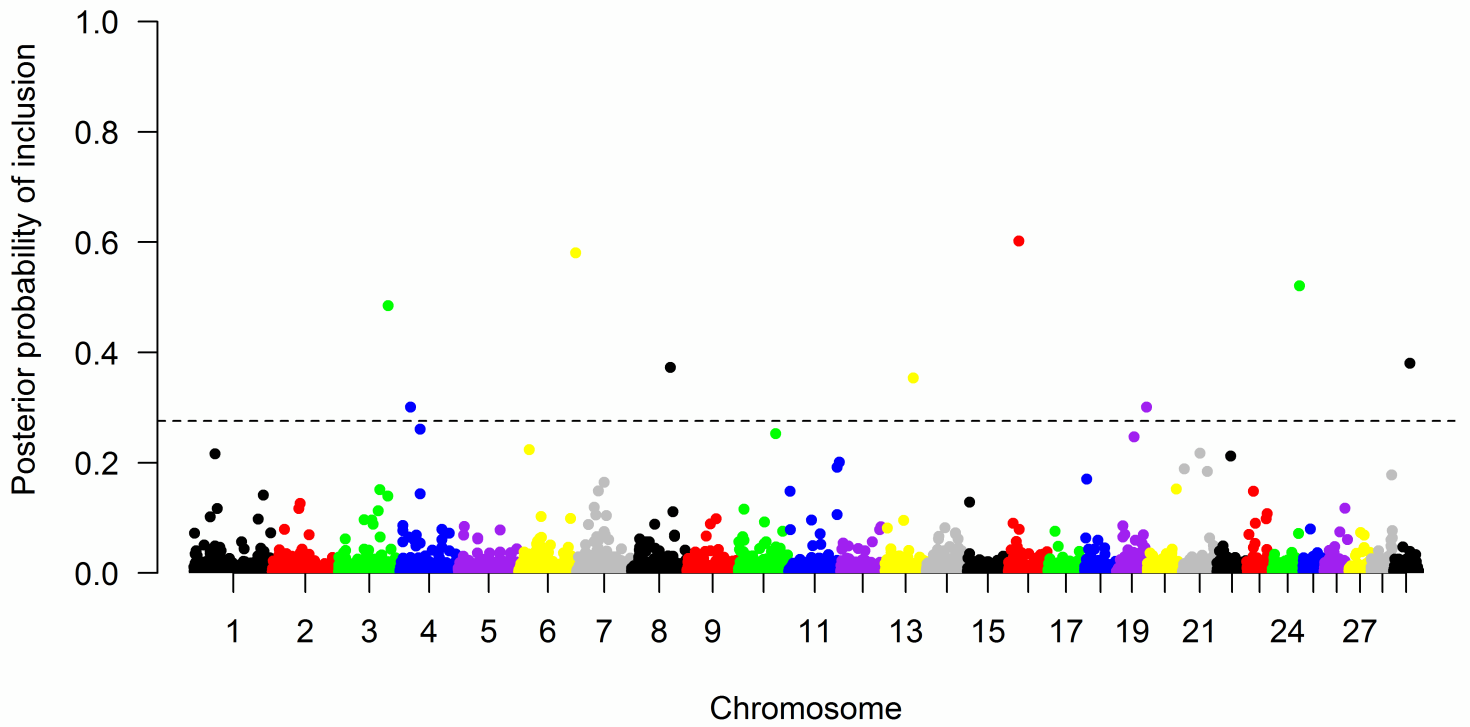

### iso17:0 in LL

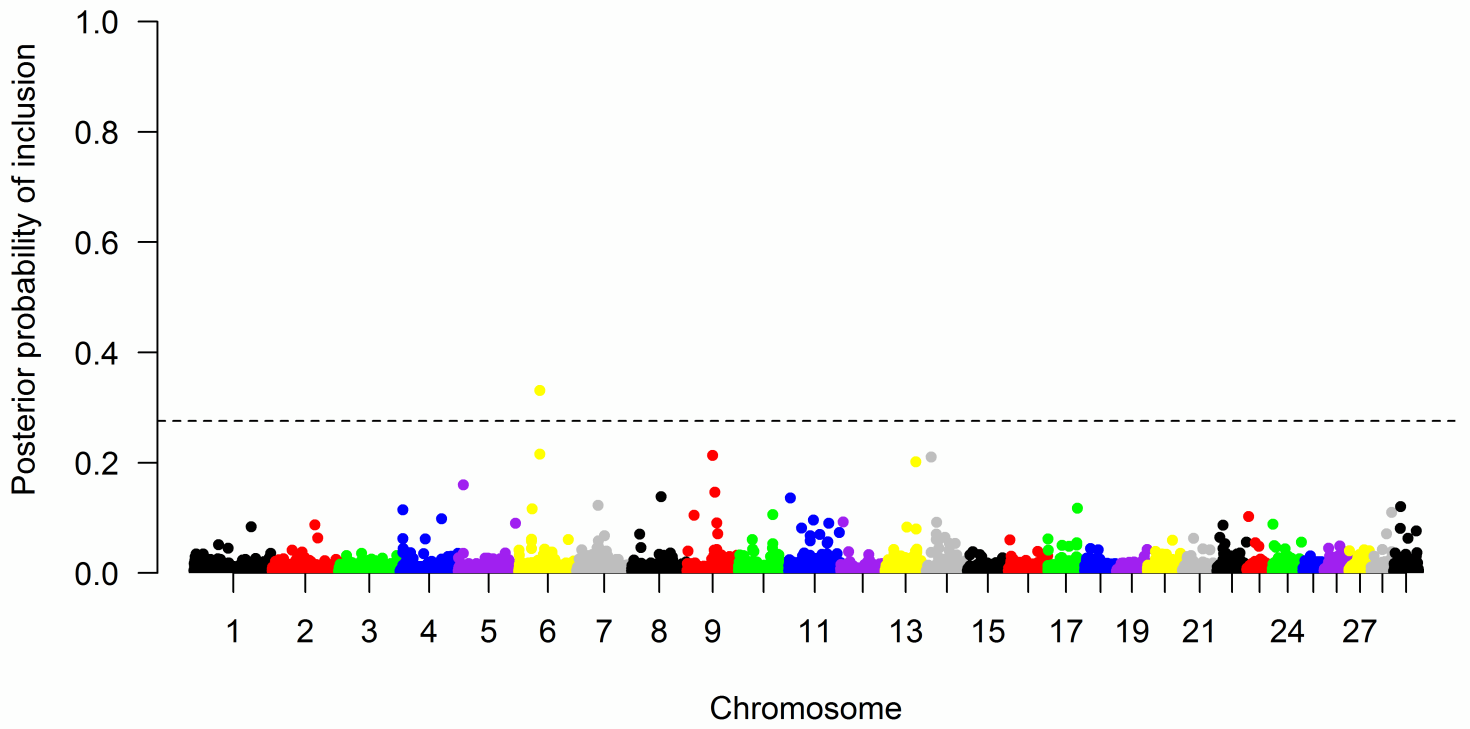

### iso17:0 in SQ

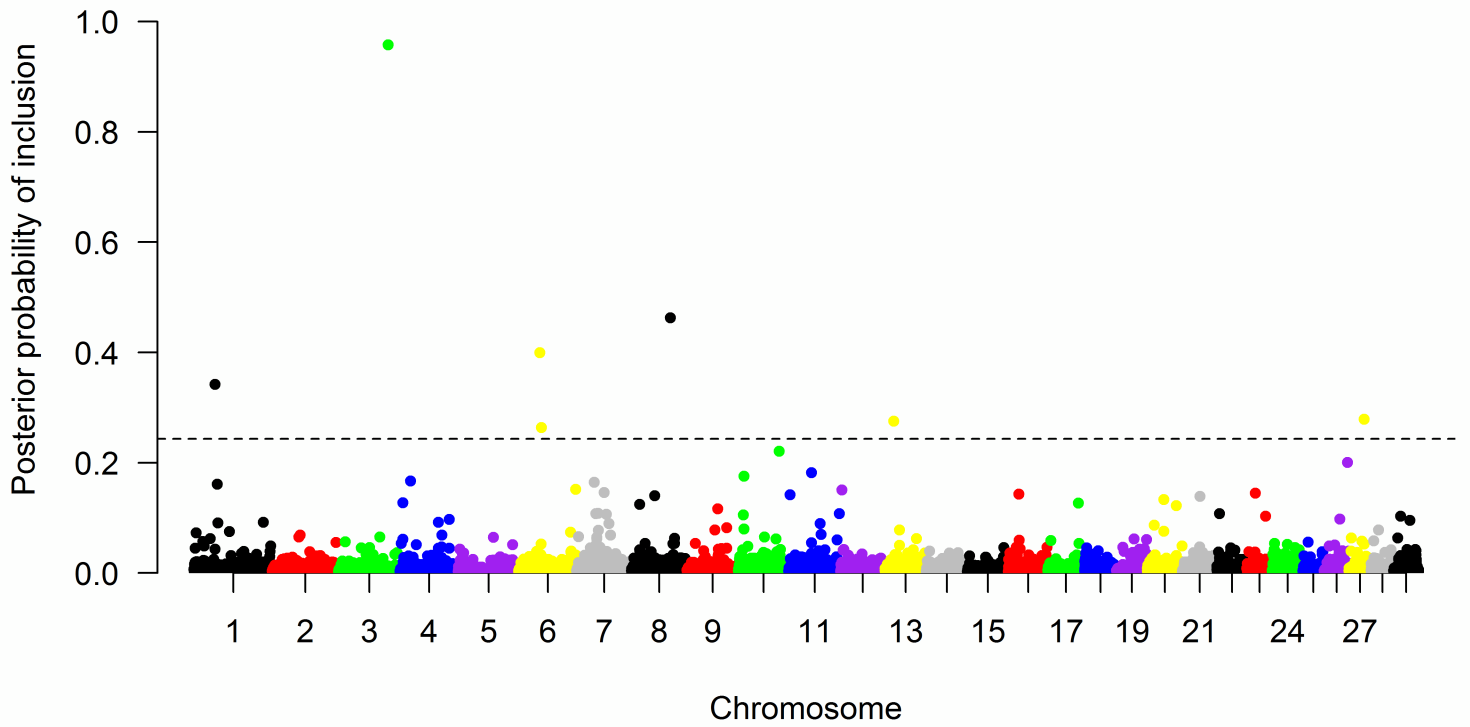

### ai17:0 in LL

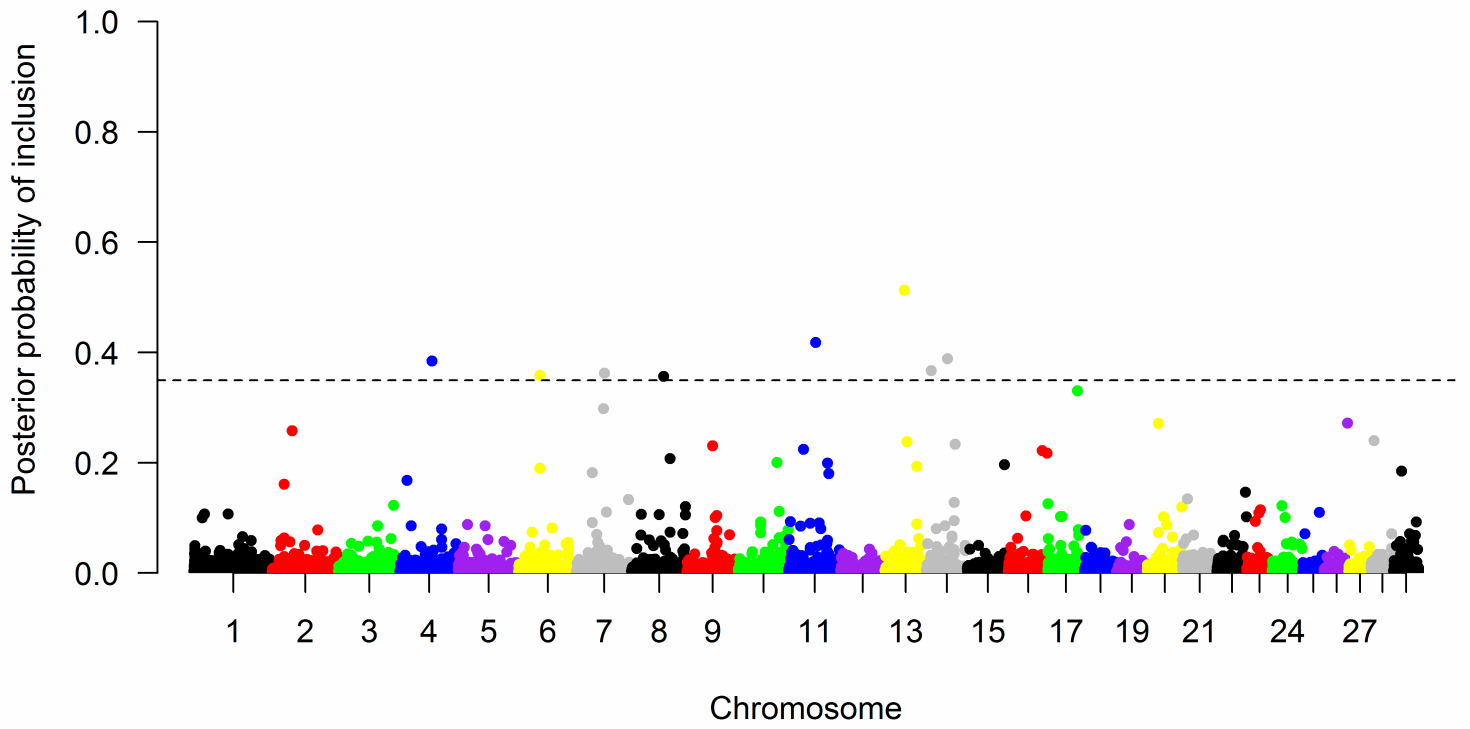

### ai17:0 in SQ

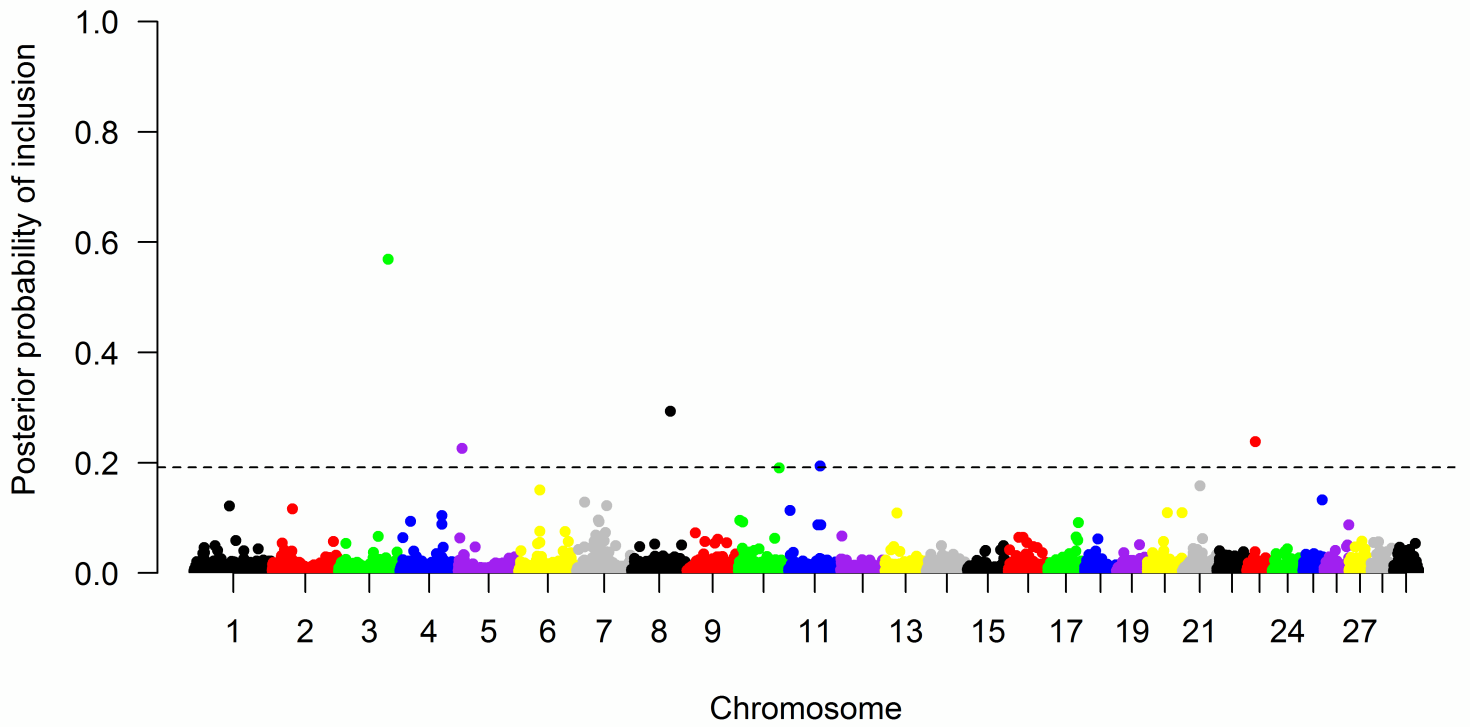

### iso18:0 in LL

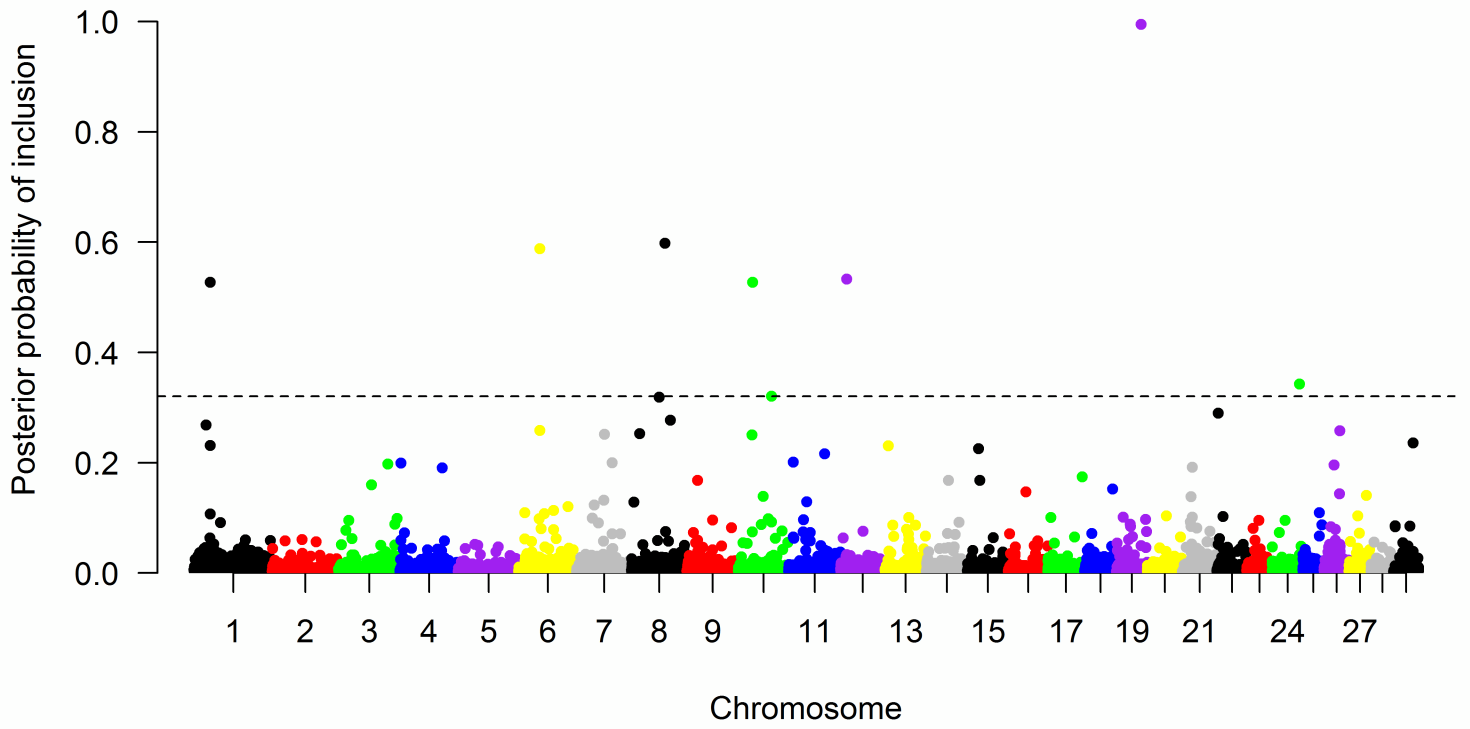

### iso18:0 in SQ

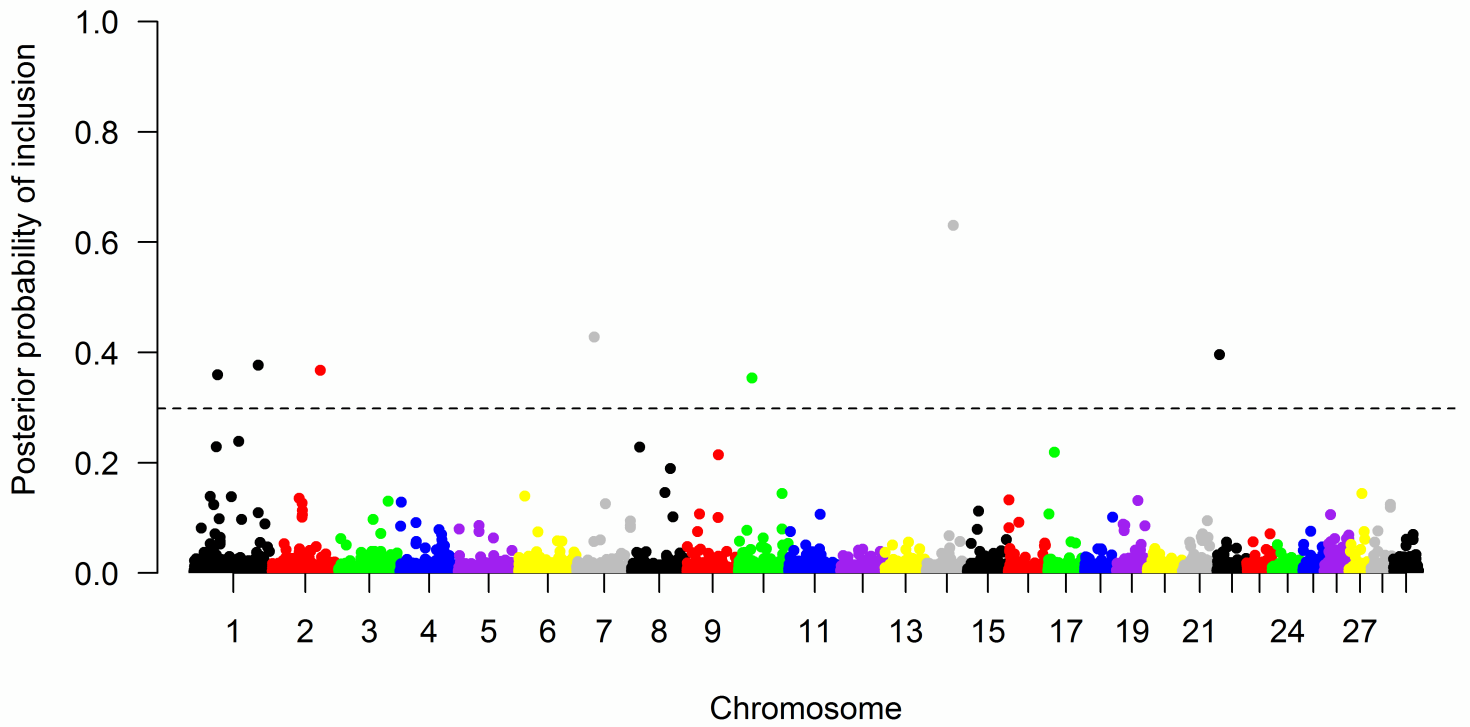

### BFA in LL

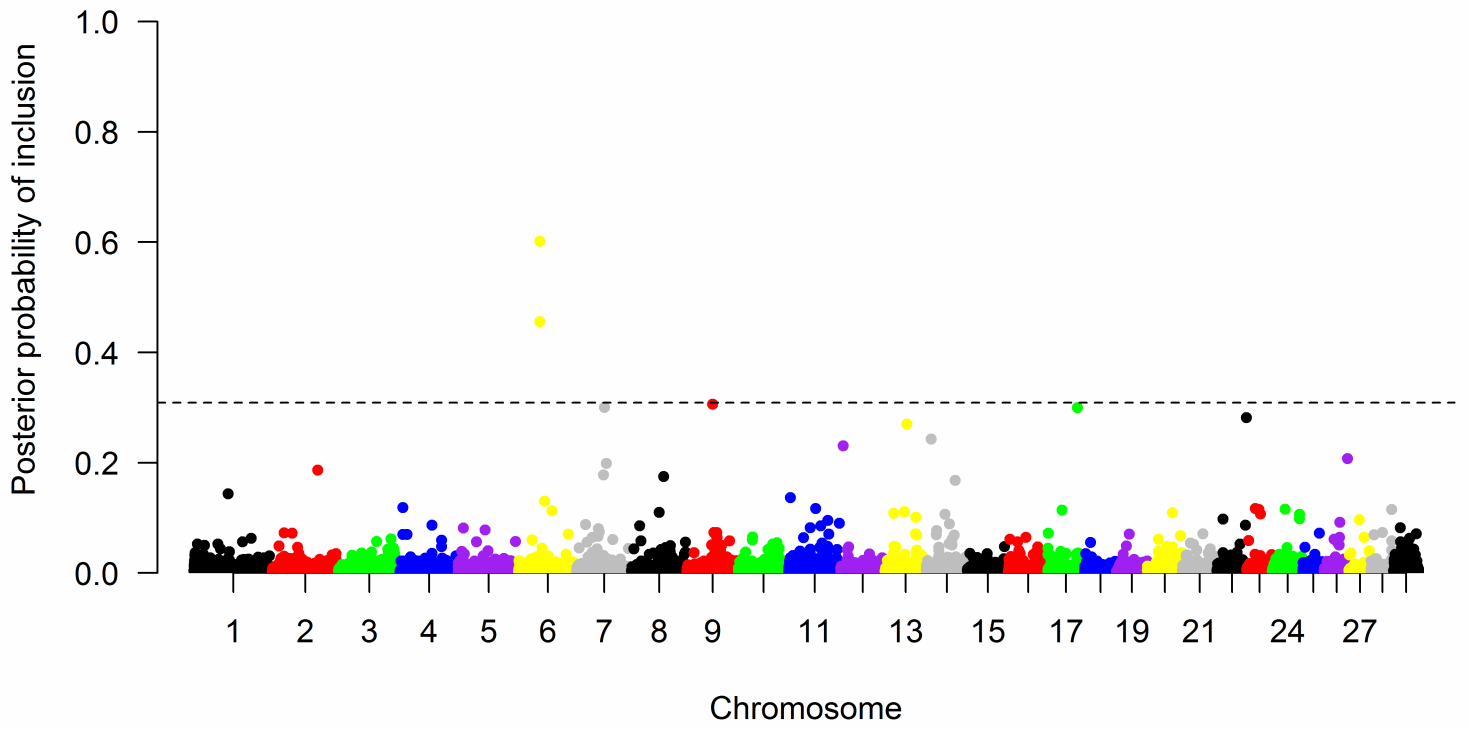

### BFA in SQ

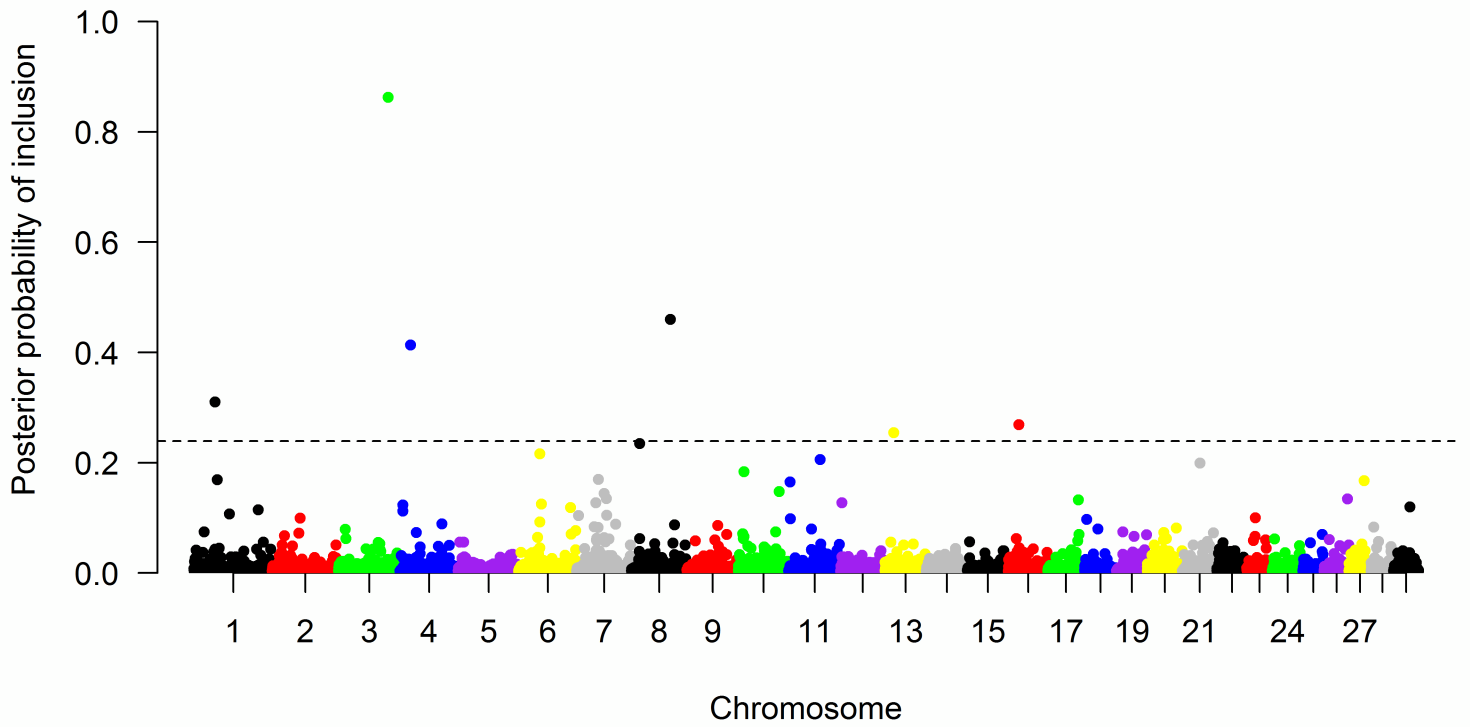

### SFA+BFA in LL

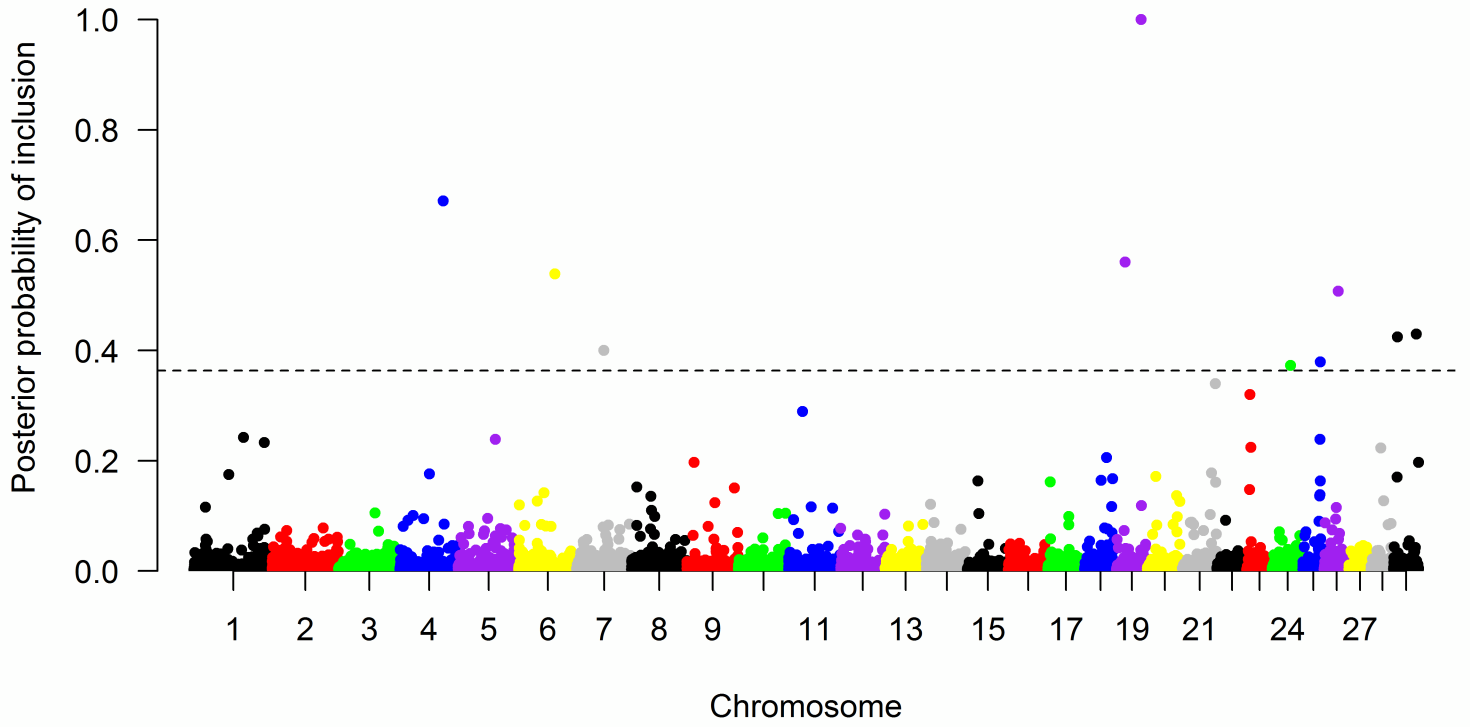

### SFA+BFA in SQ

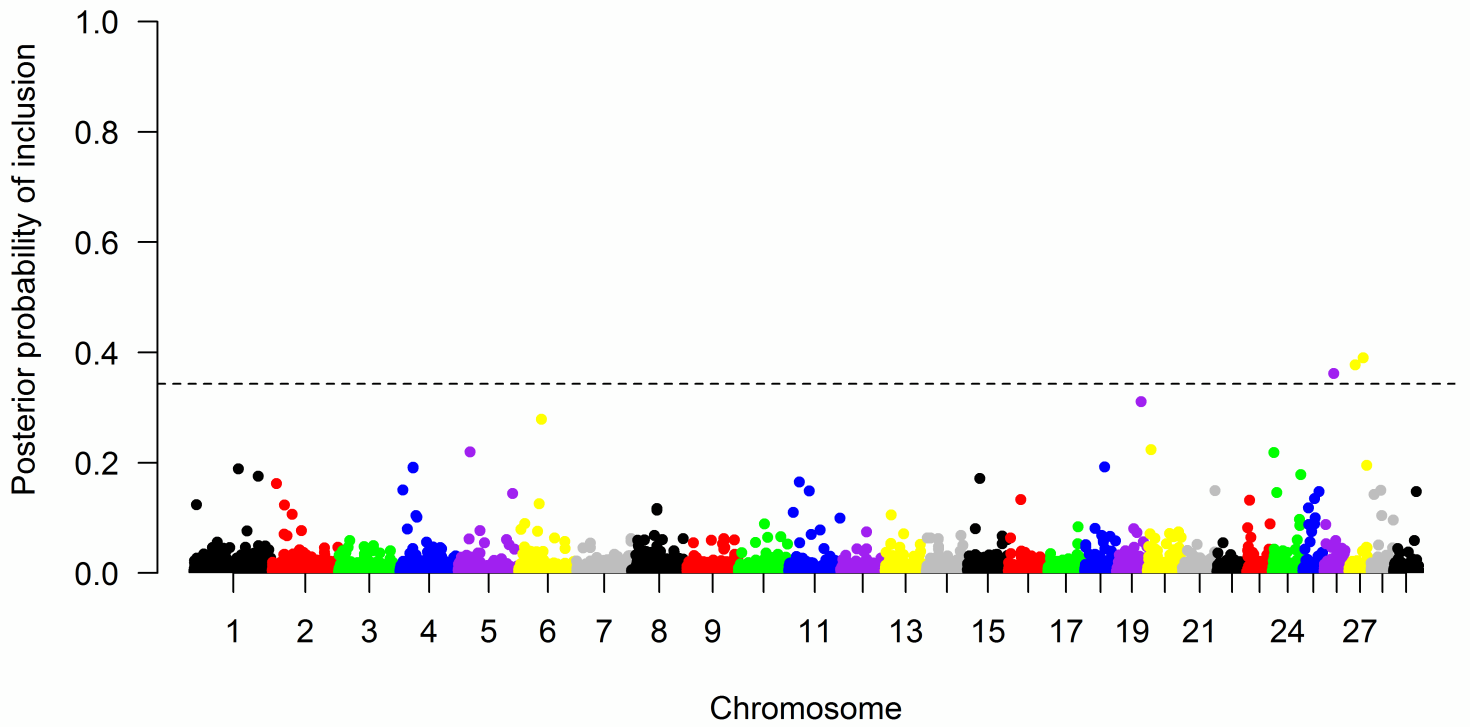

### 9c-14:1 in LL

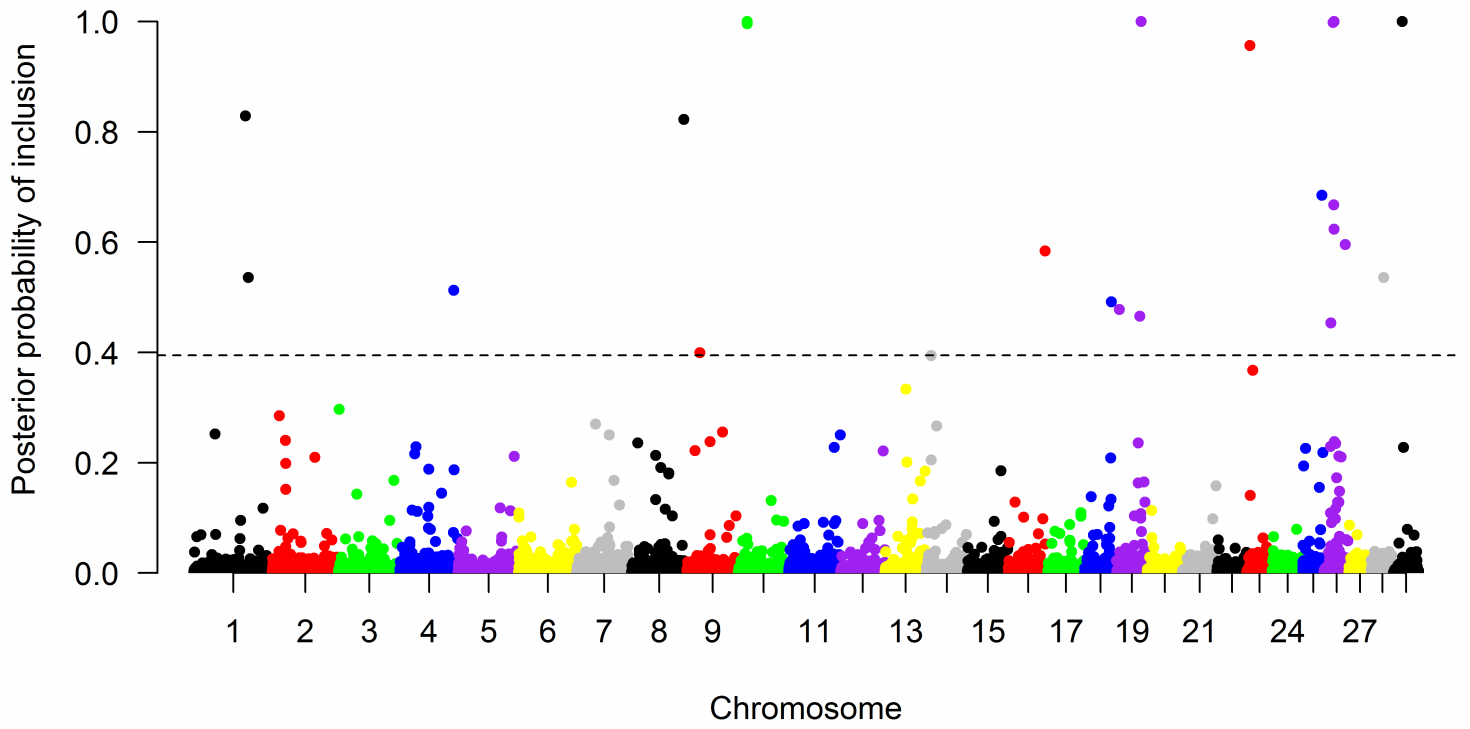

### 9c-14:1 in SQ

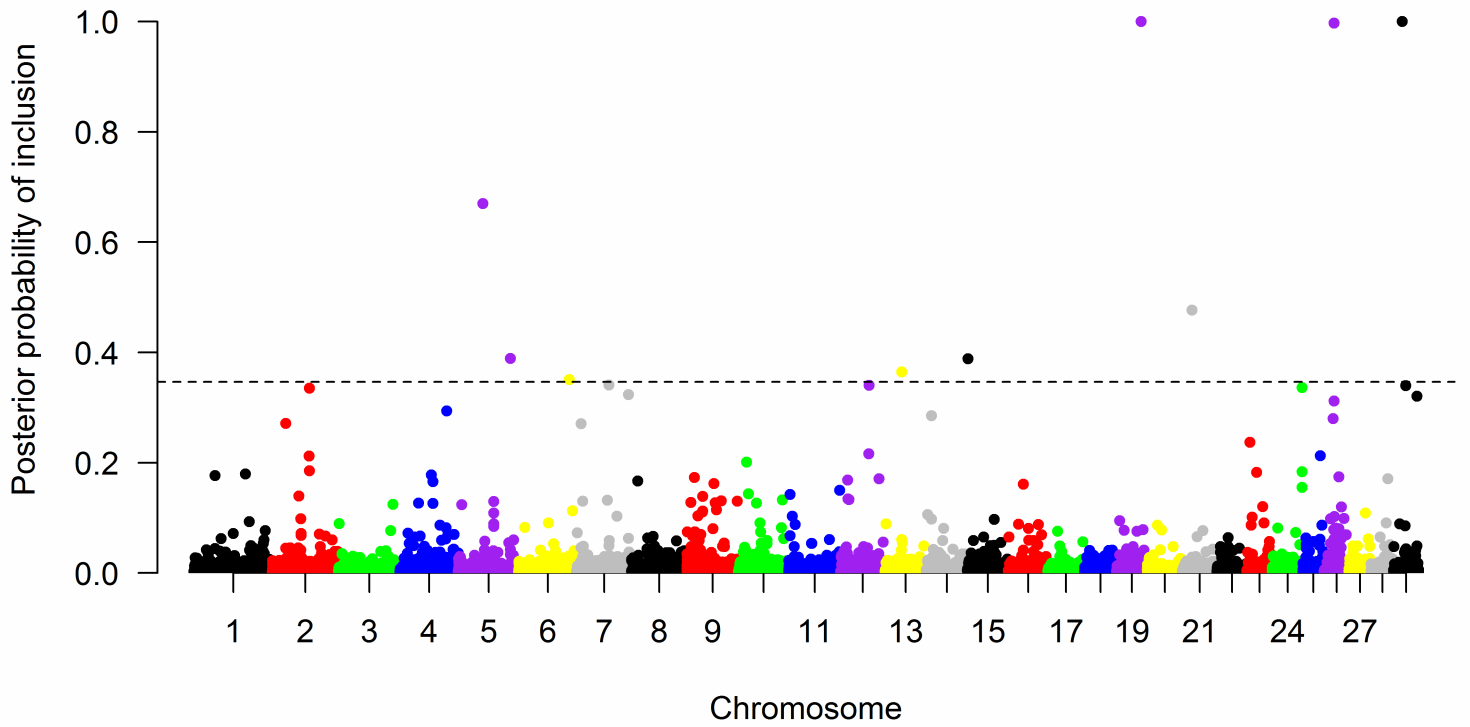

### 9c-15:1 in LL

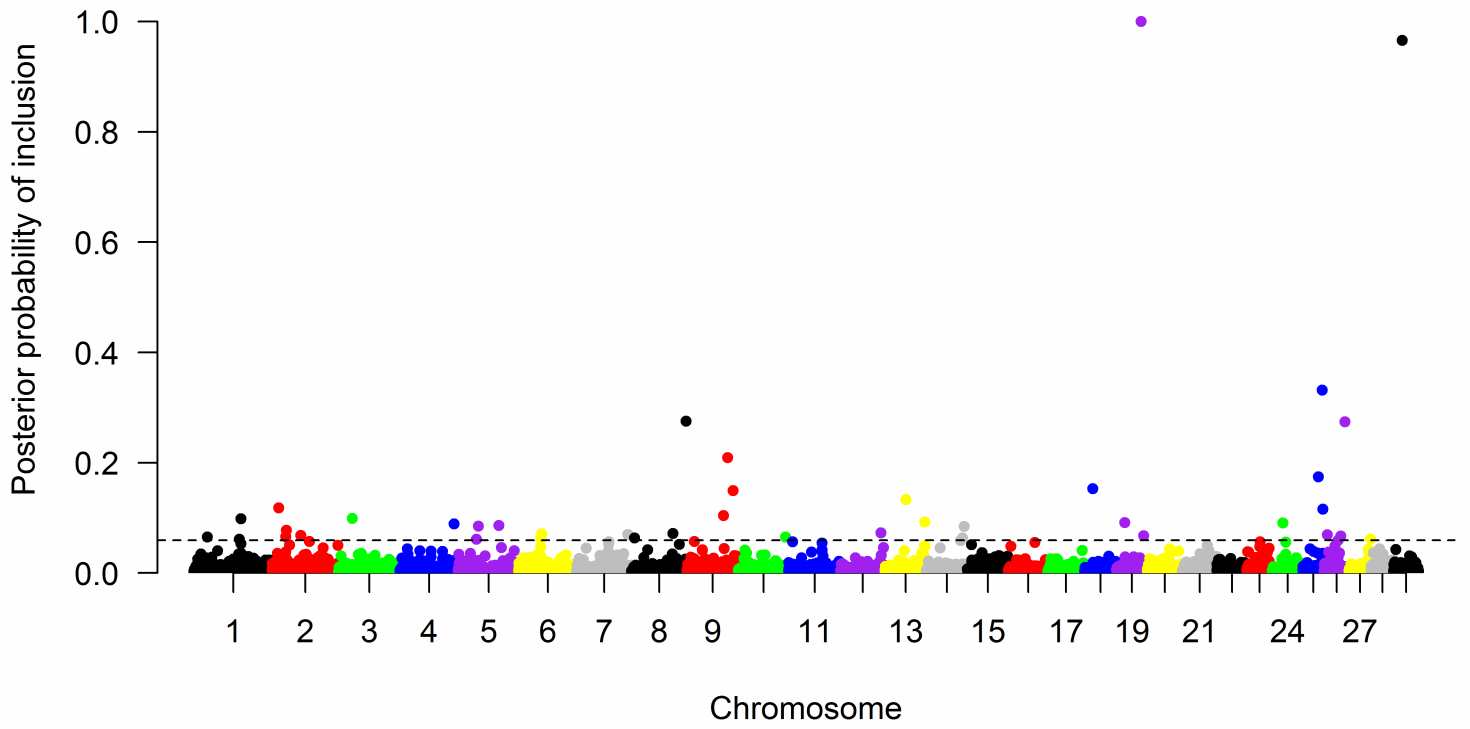

### 9c-15:1 in SQ

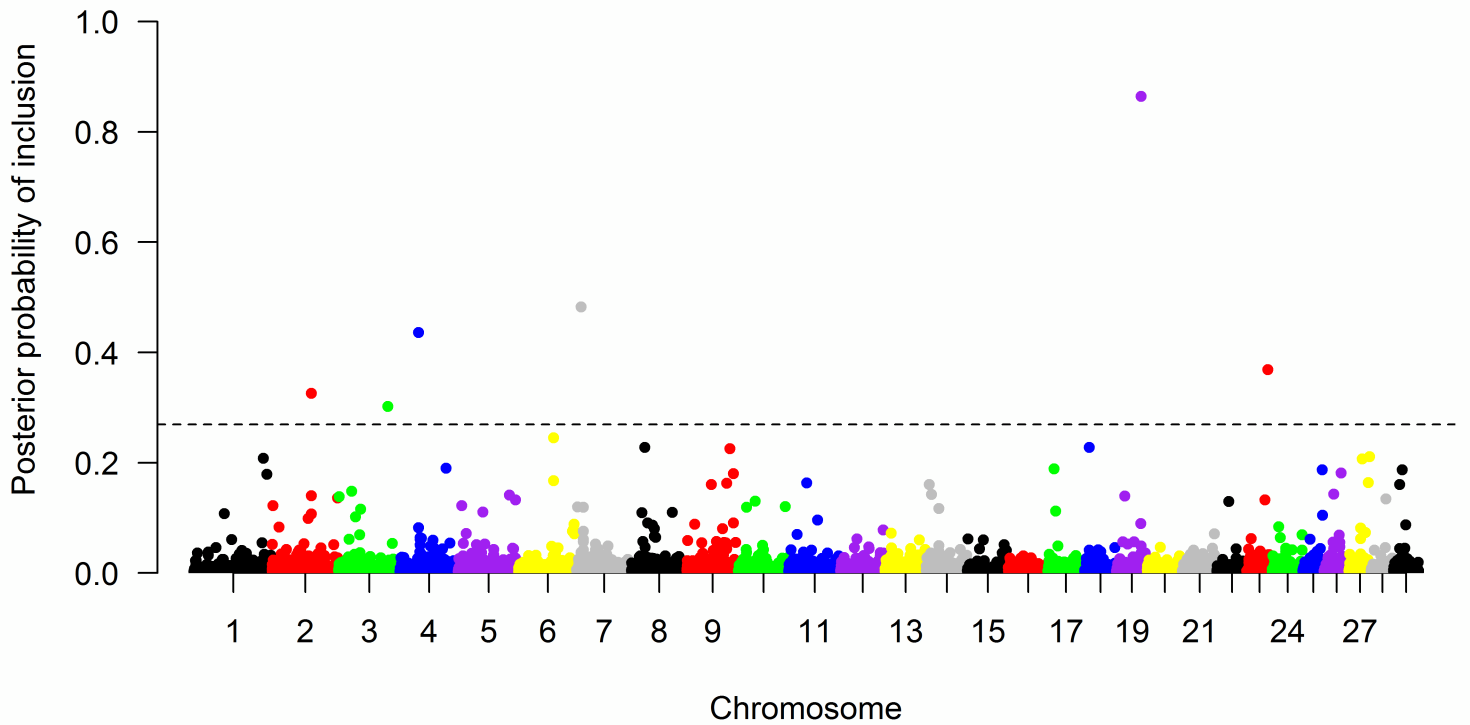



### 7c-16:1 in LL

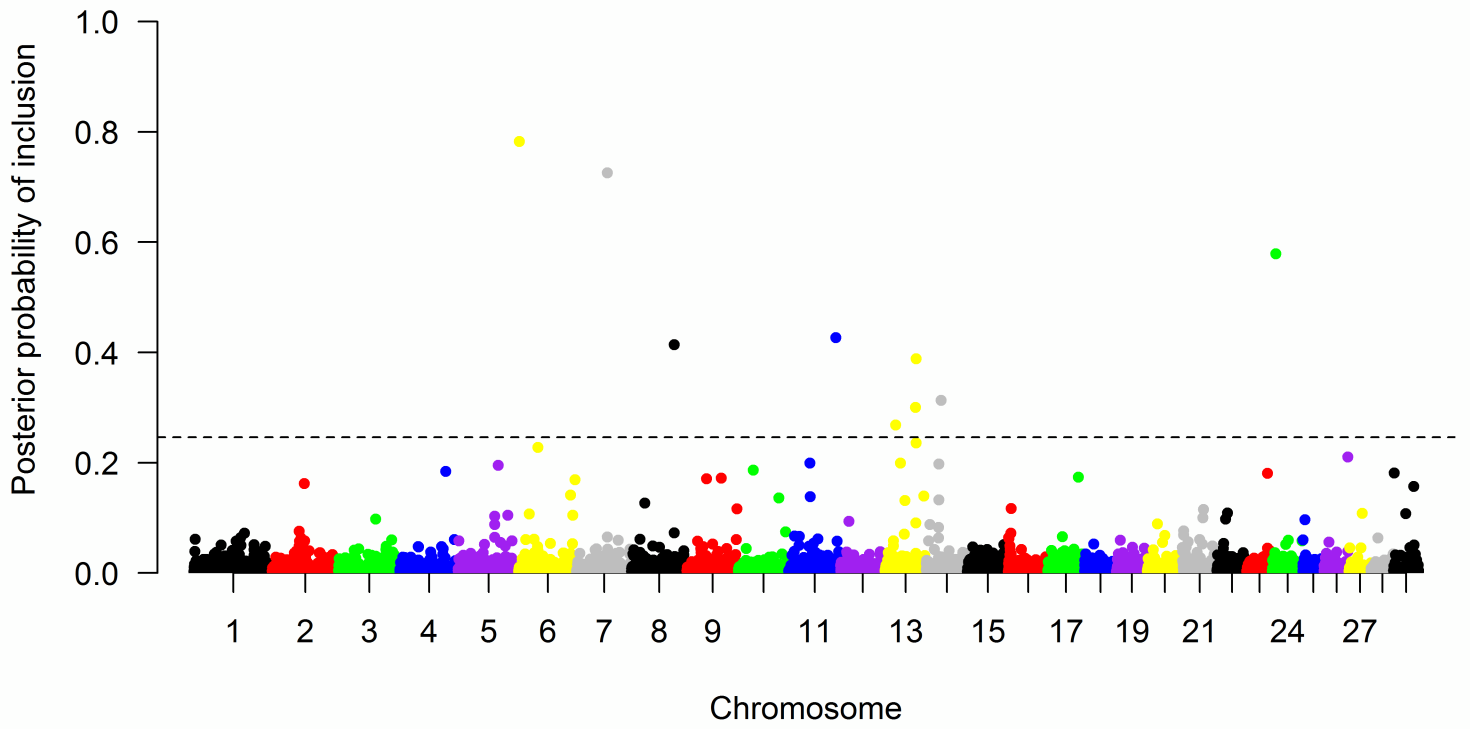

### 7c-16:1 in SQ

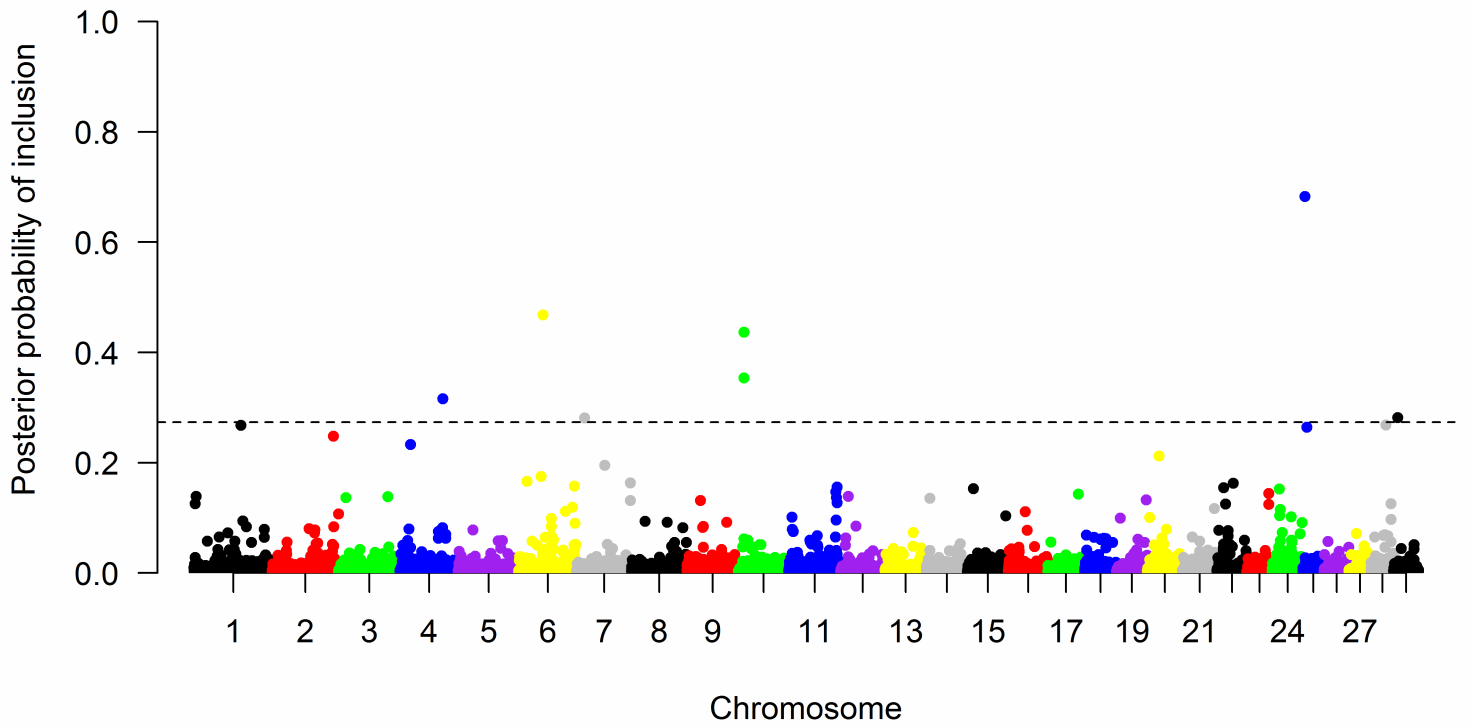

### 9c-16:1 in LL

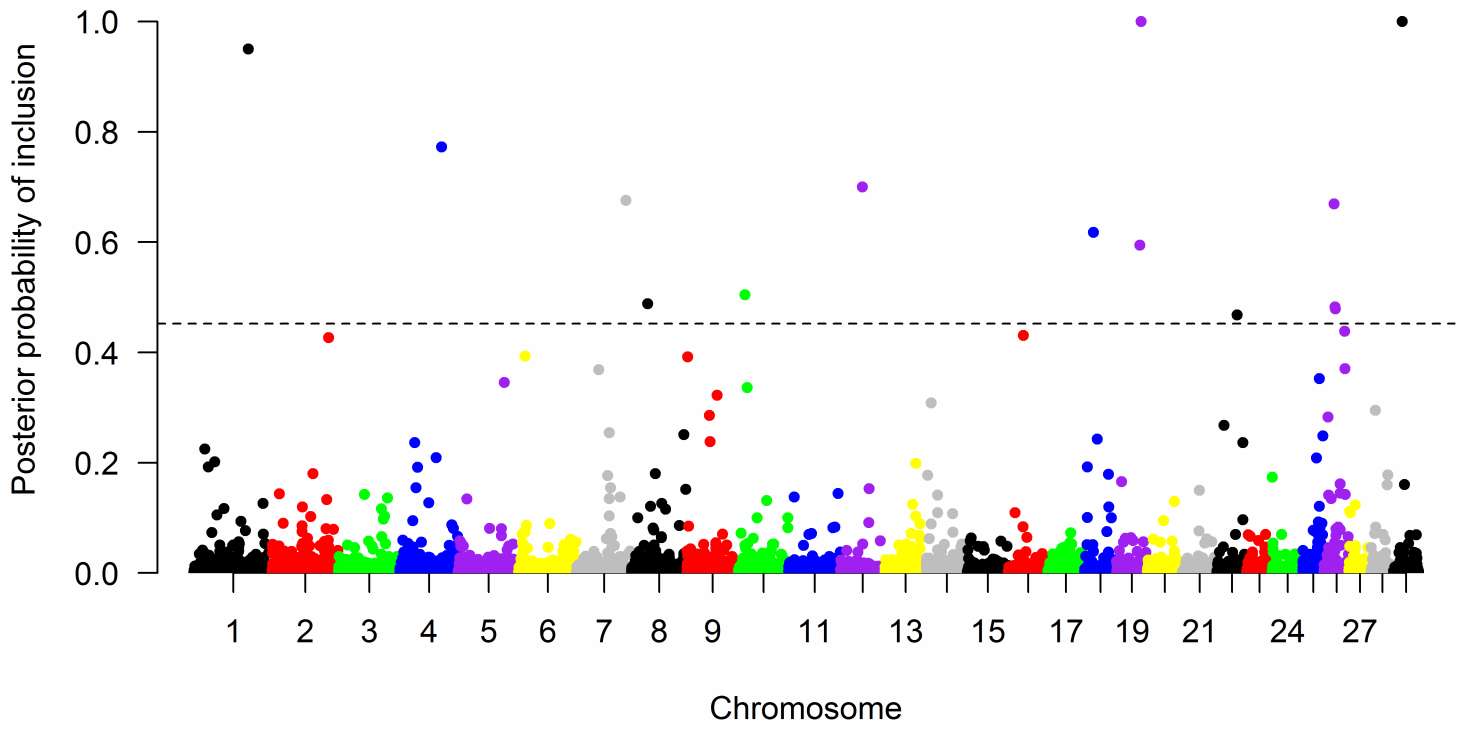

### 9c-16:1 in SQ

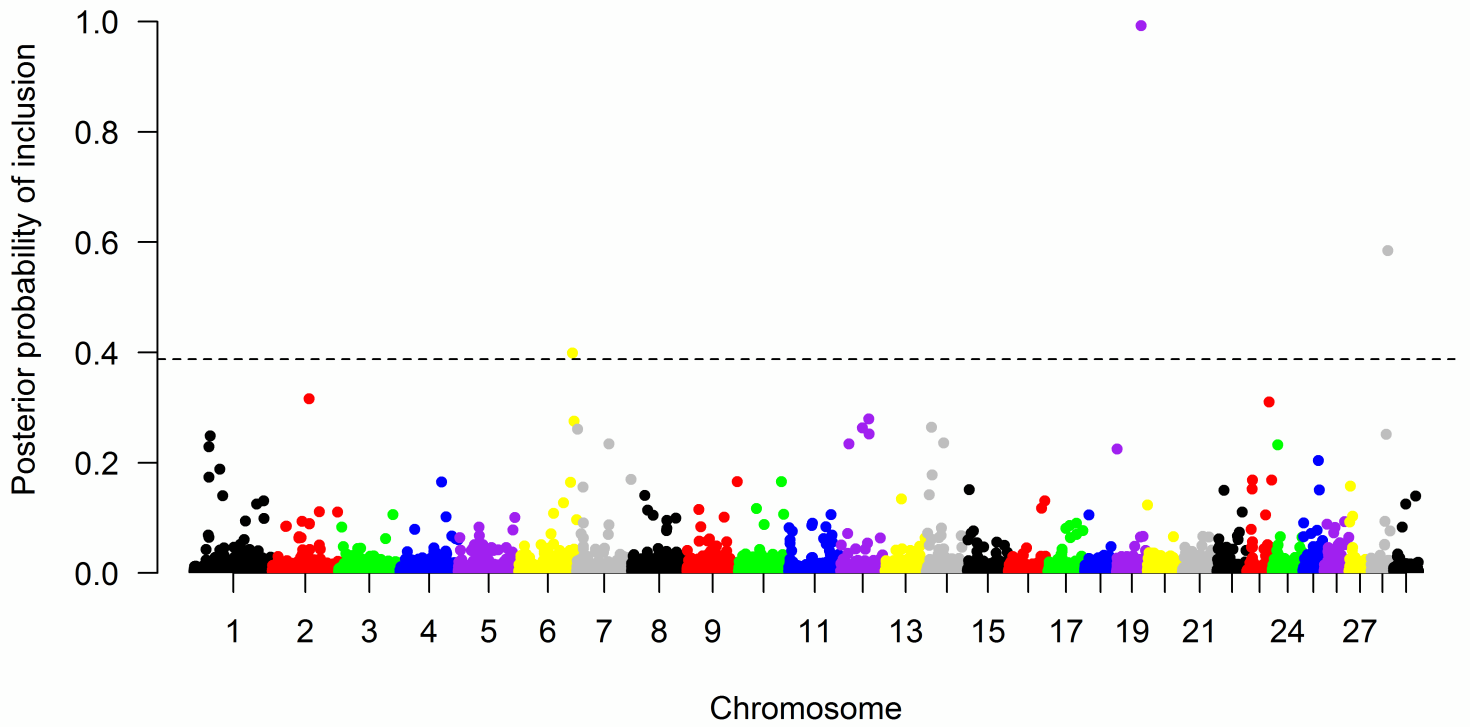

### 11t-16:1 in LL

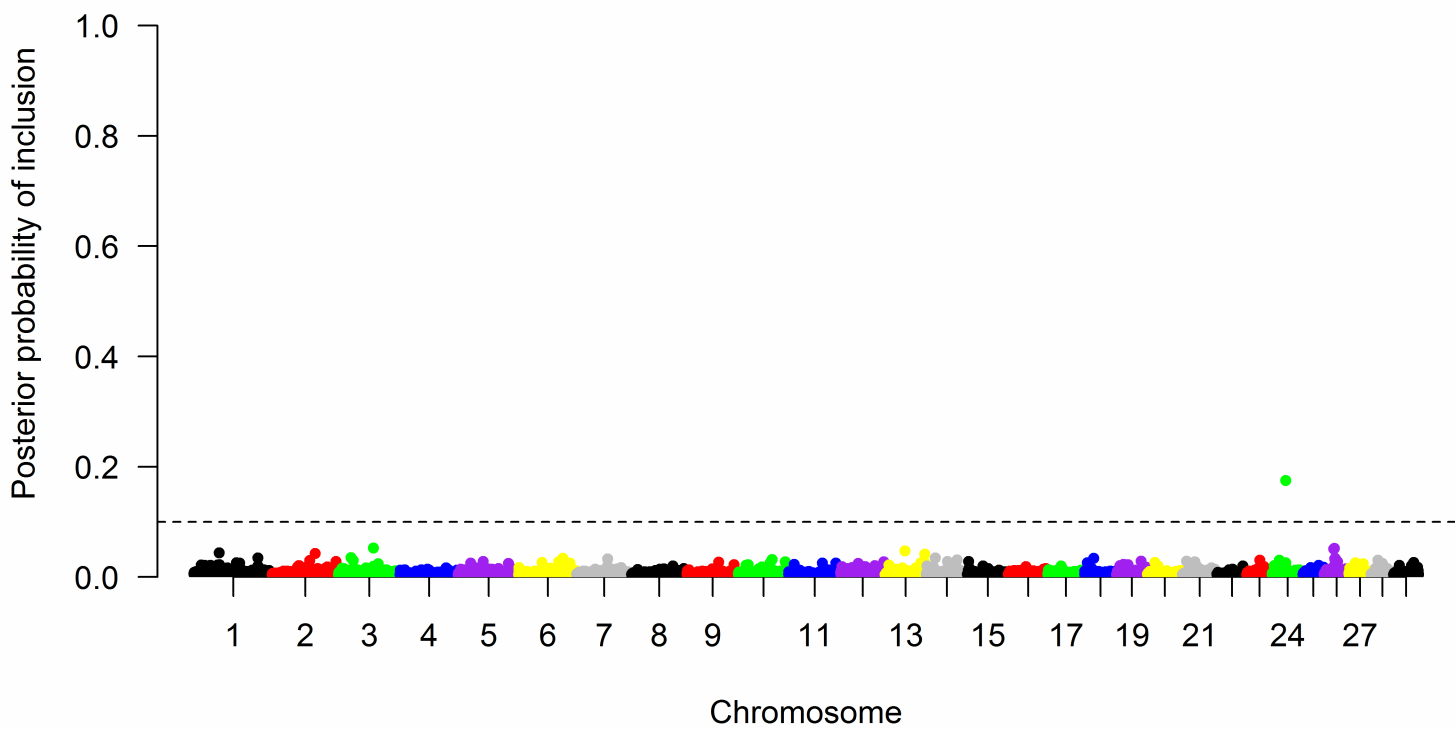

### 11t-16:1 in SQ

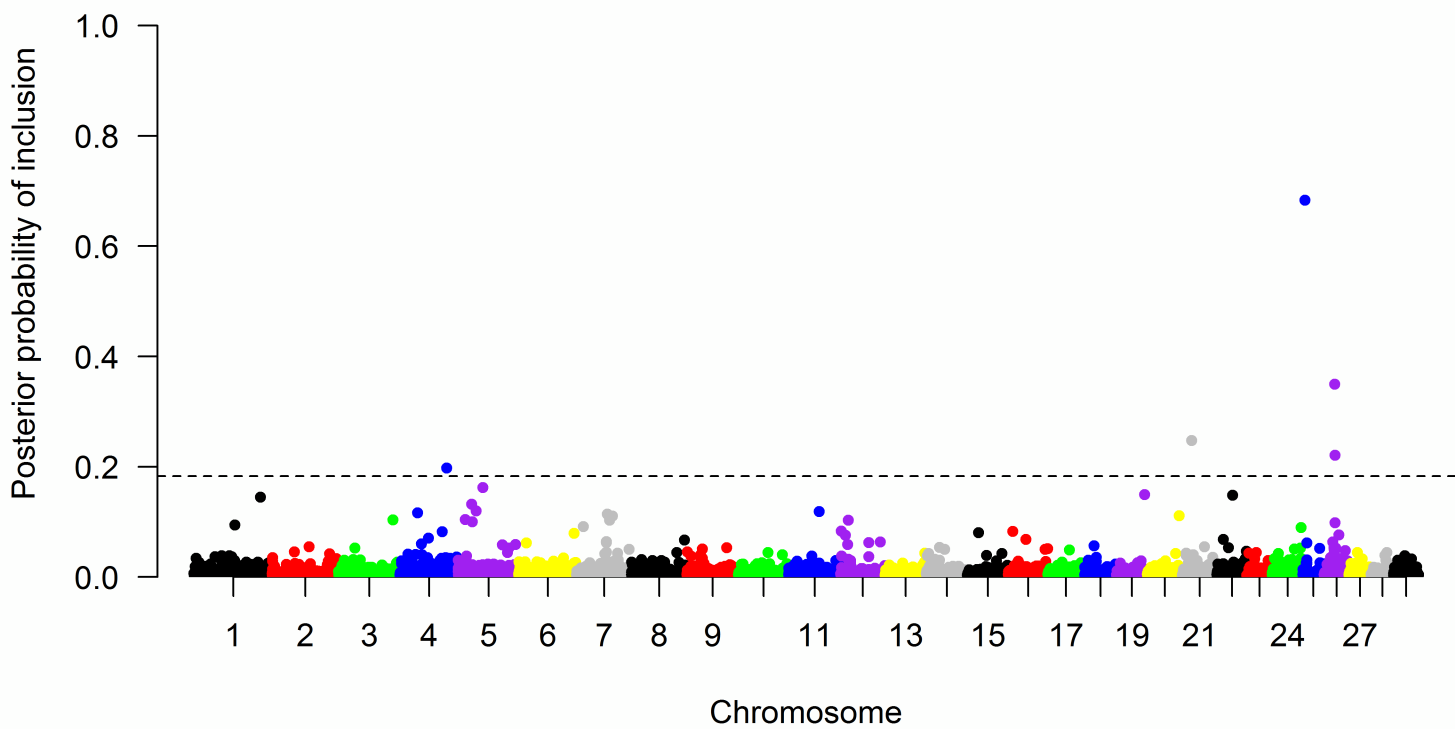

### 12c-16:1 in LL

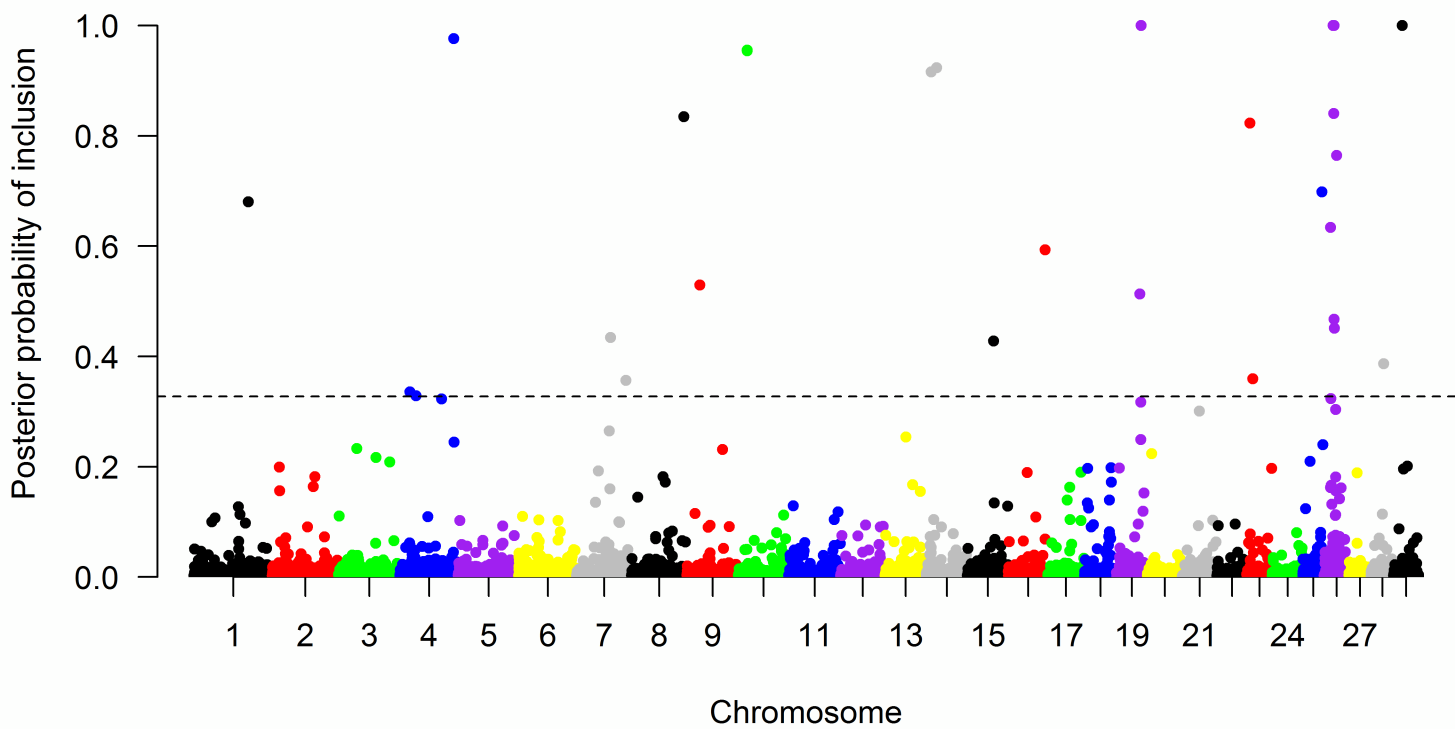

### 12c-16:1 in SQ

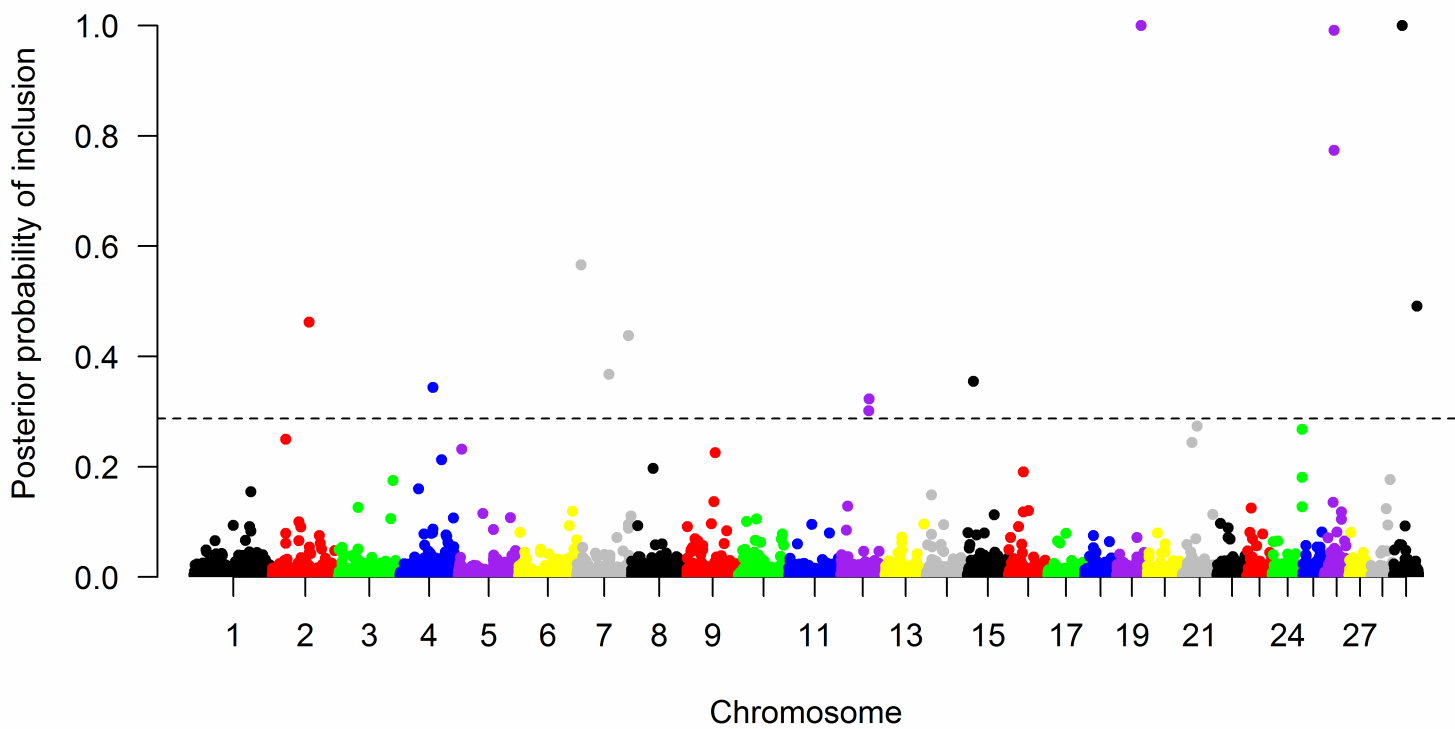

### 7c-17:1 in LL

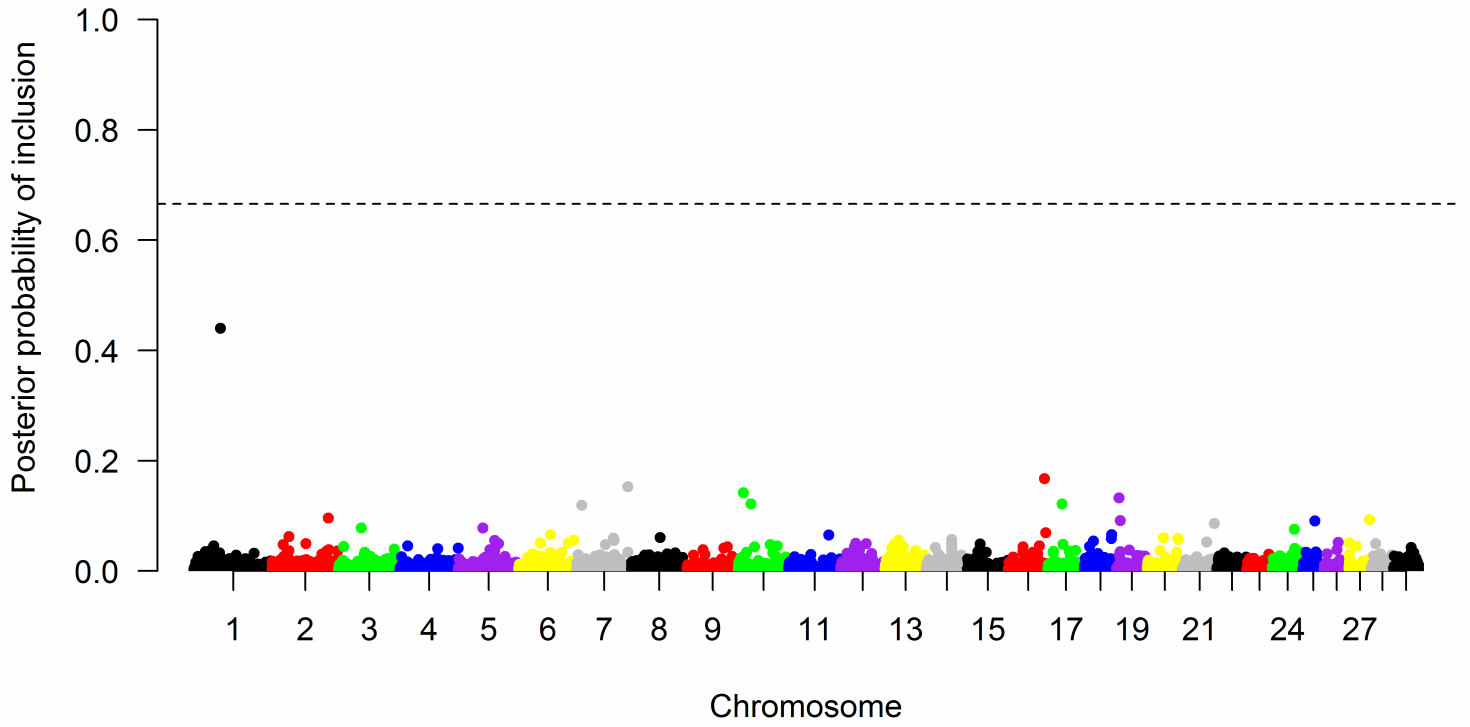

### 7c-17:1 in SQ

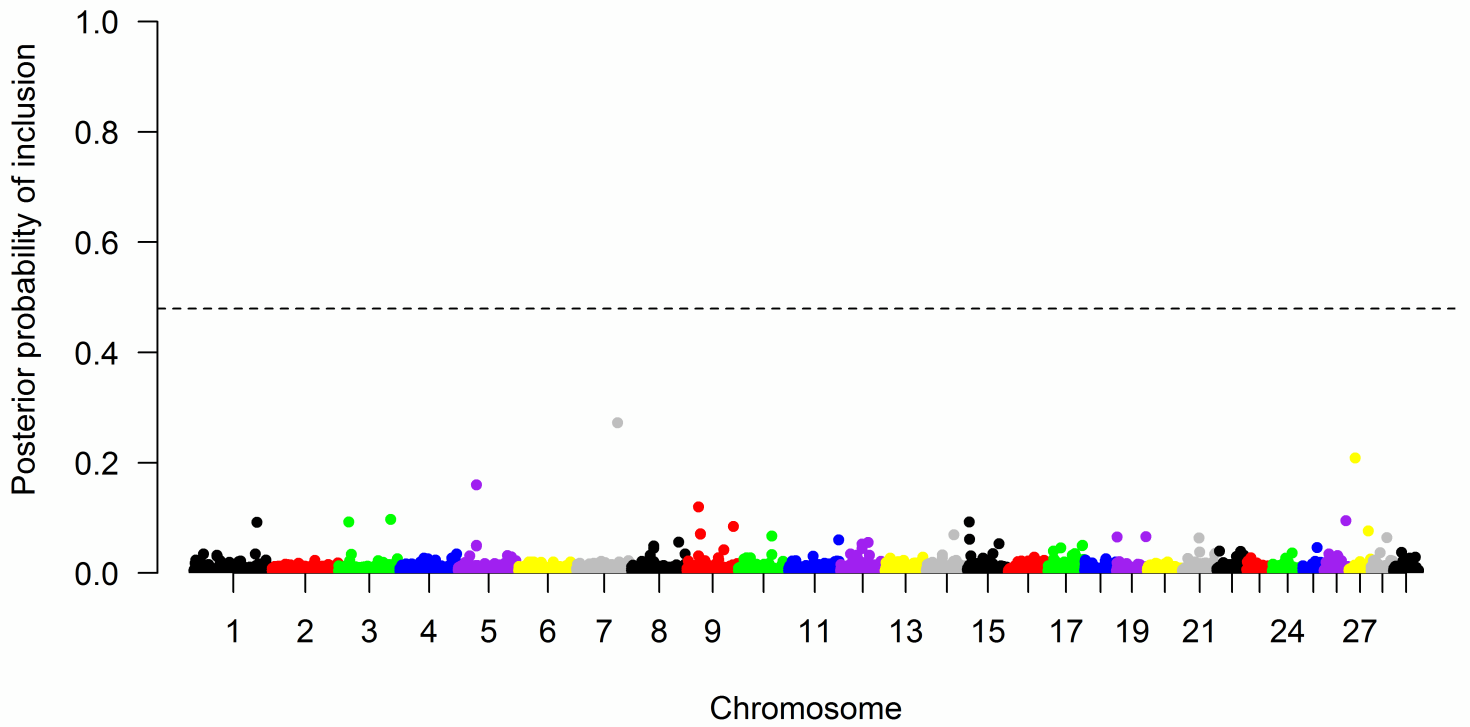

### 9c-17:1 in LL

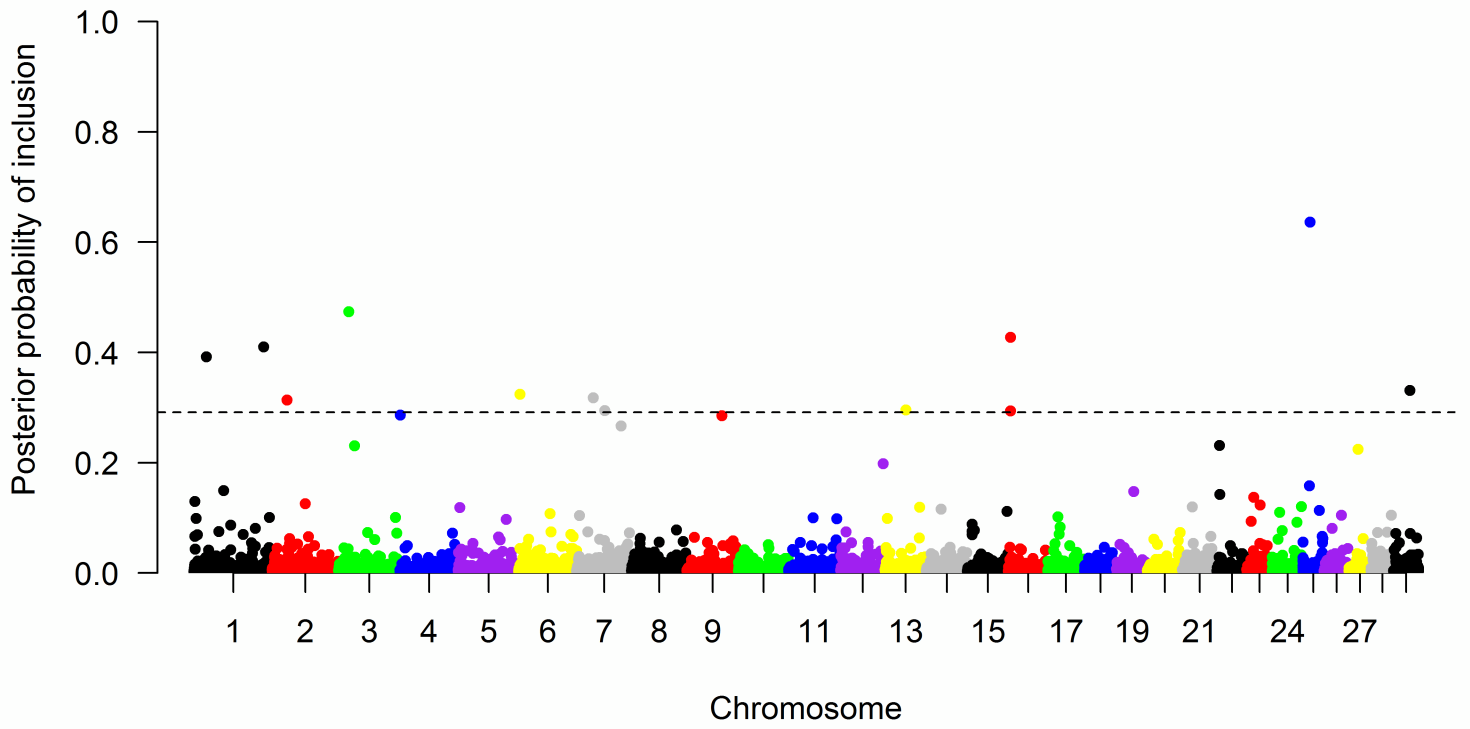

### 9c-17:1 in SQ

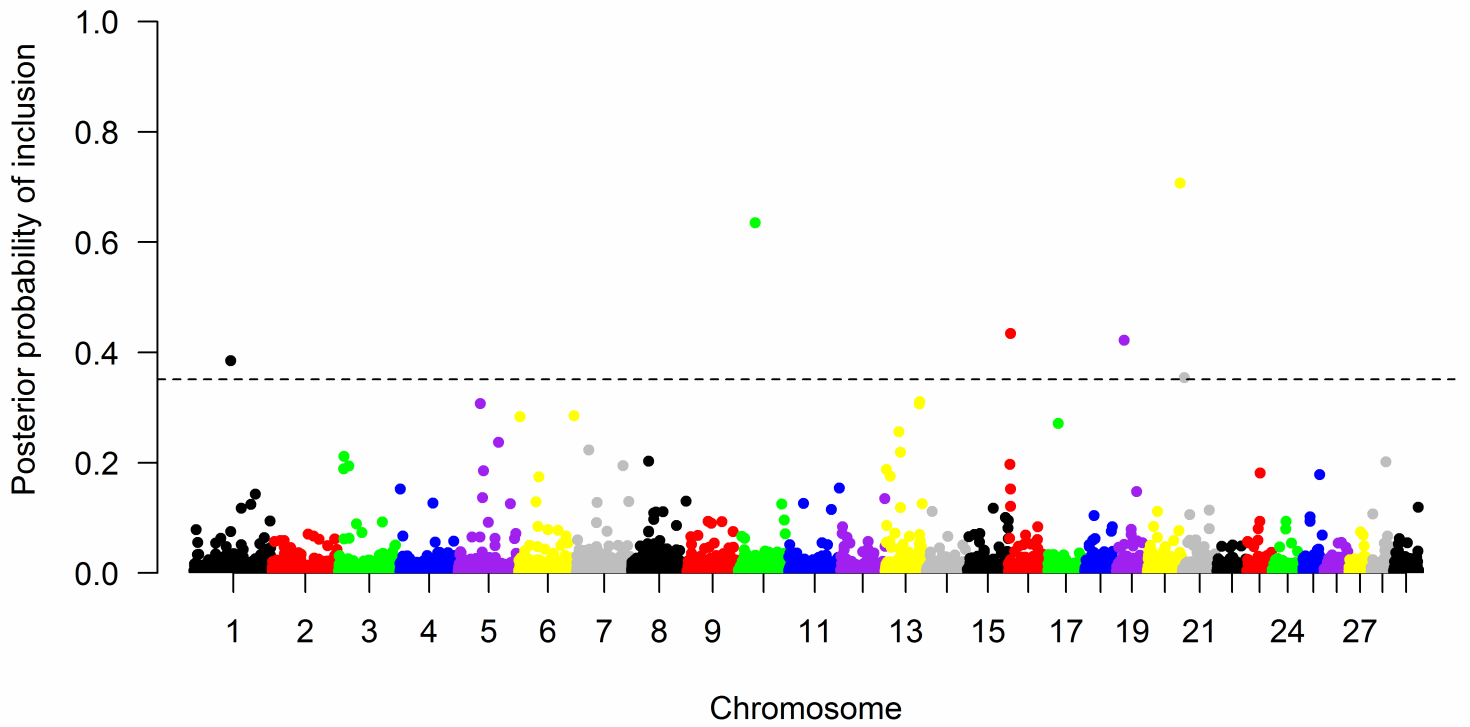

### 9c-18:1 in LL

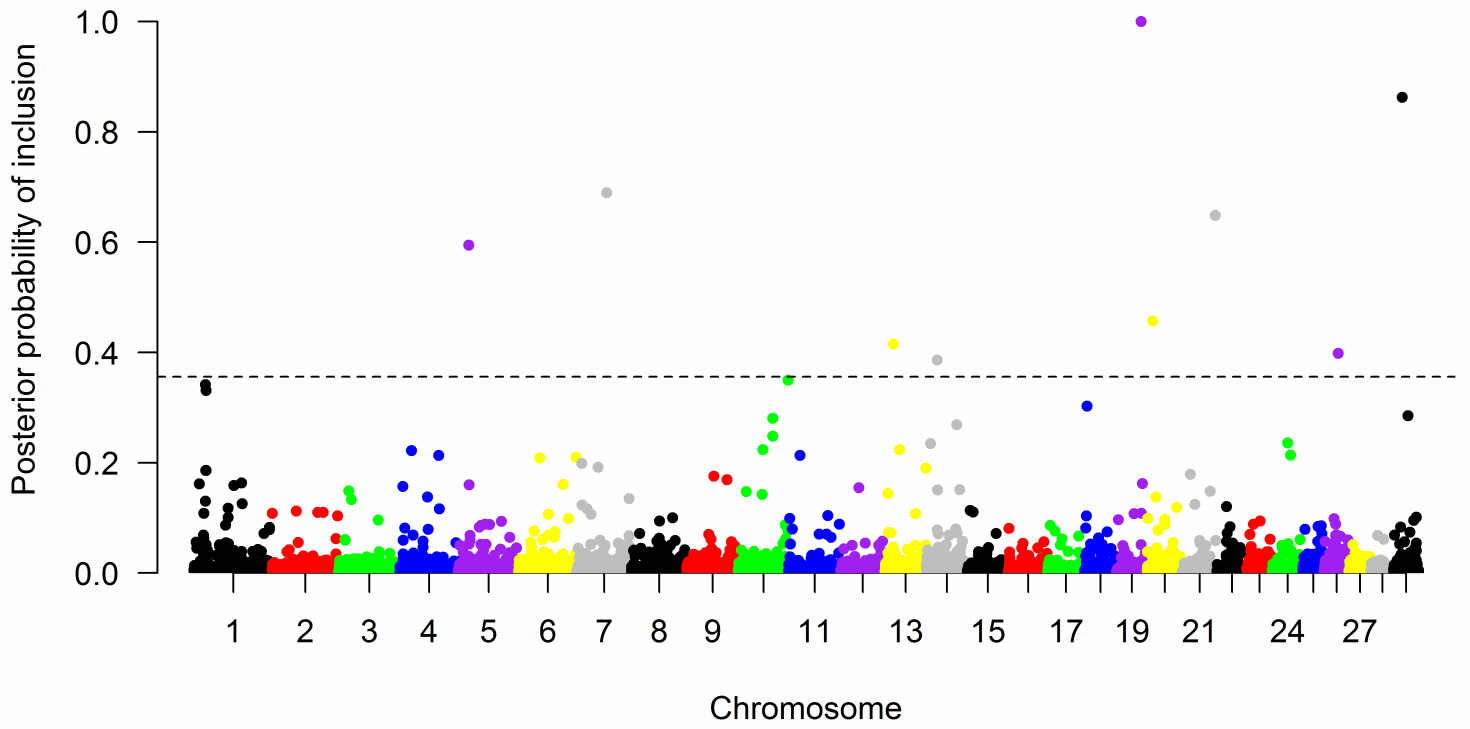

### 9c-18:1 in SQ

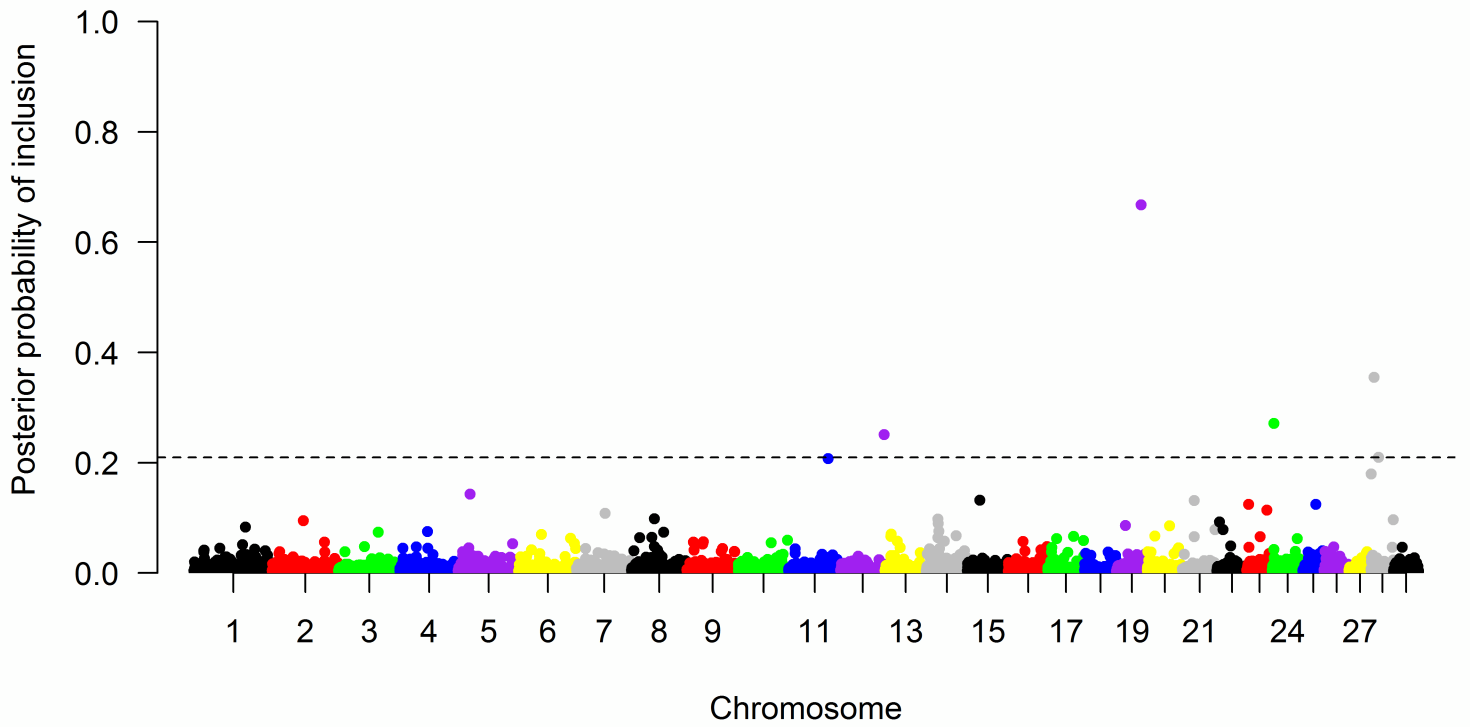

### 11c-18:1 in LL

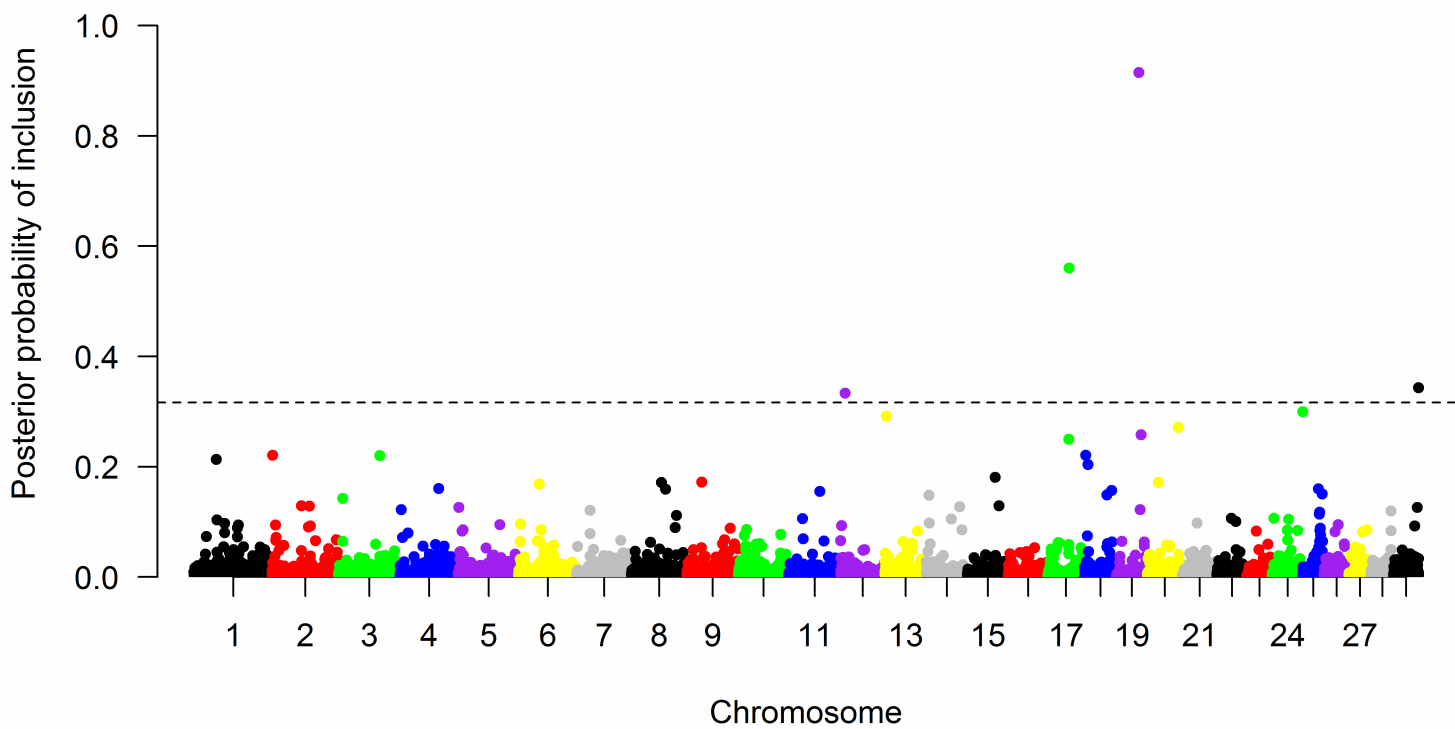

### 11c-18:1 in SQ

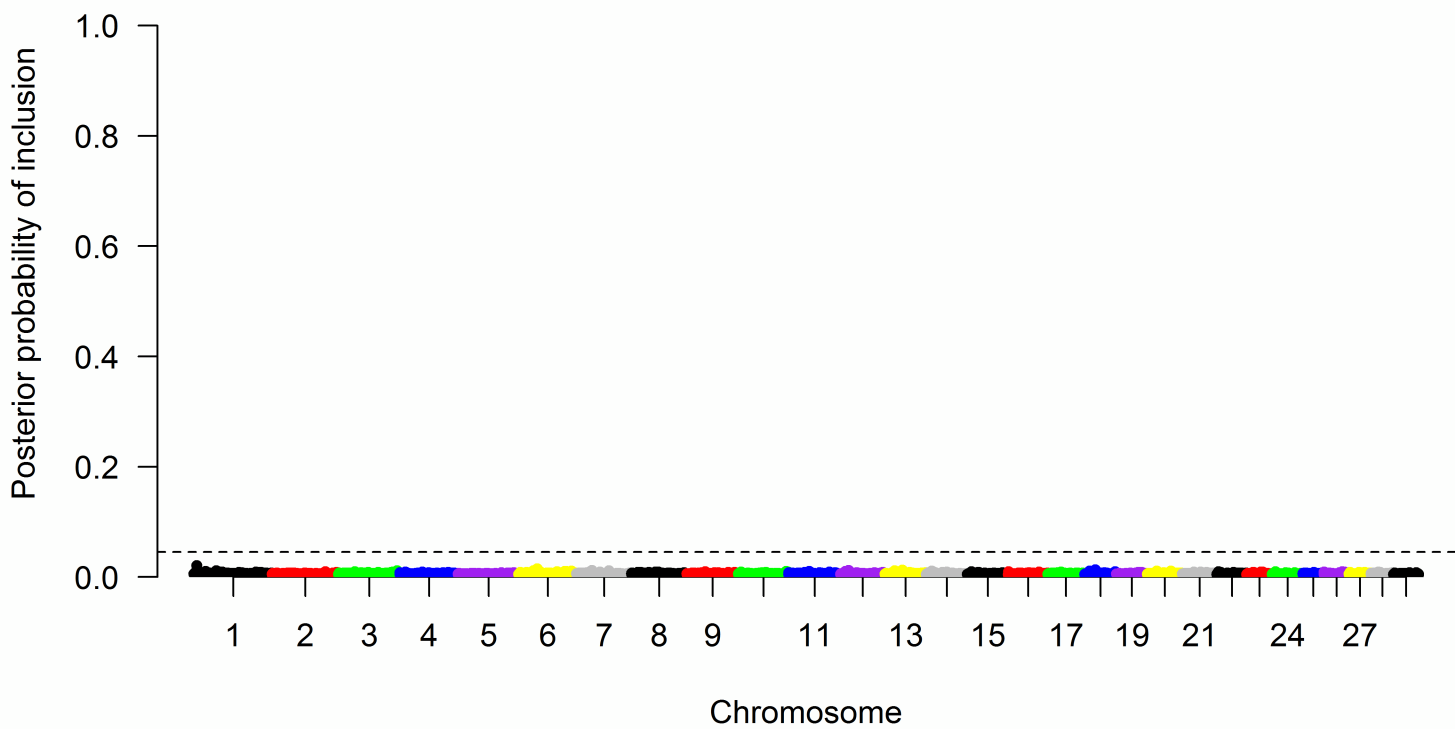



### 12c-18:1 in LL

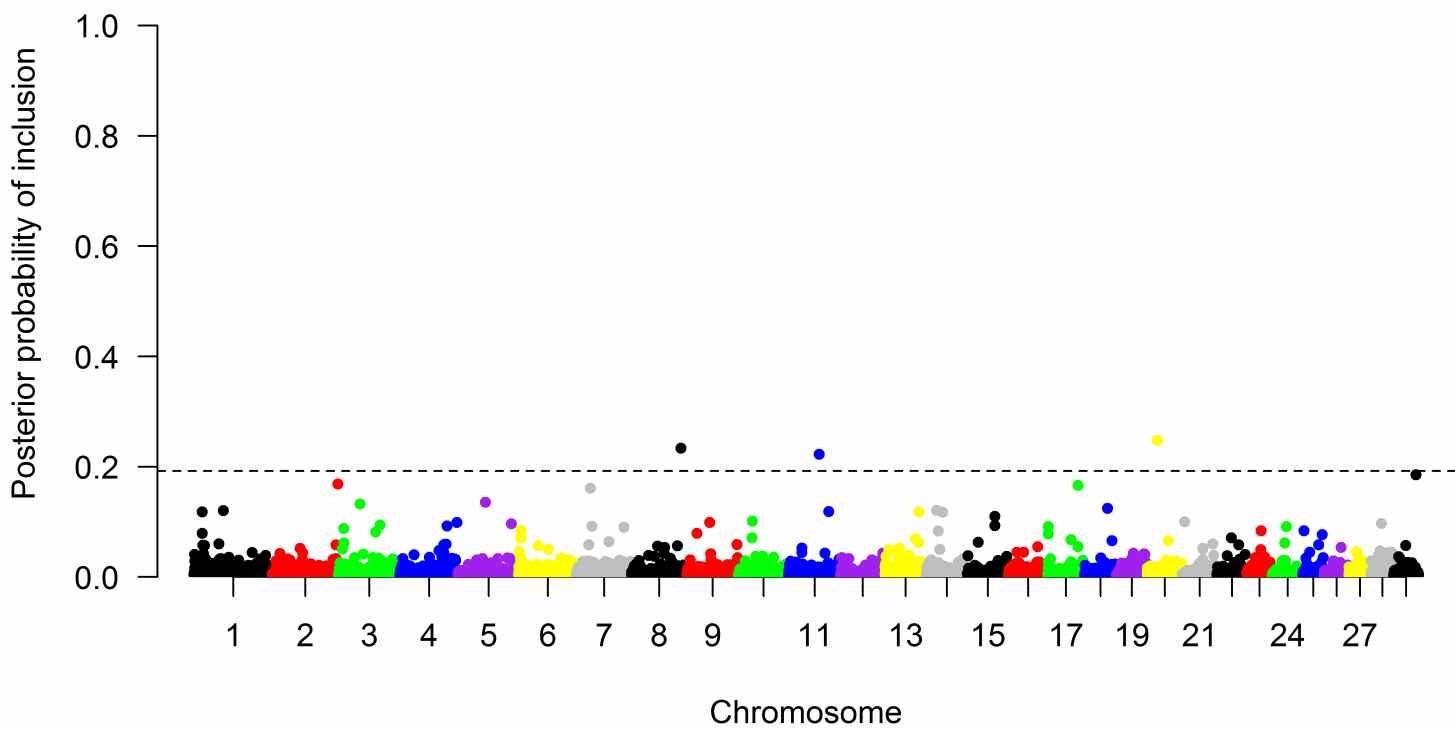

### 12c-18:1 in SQ

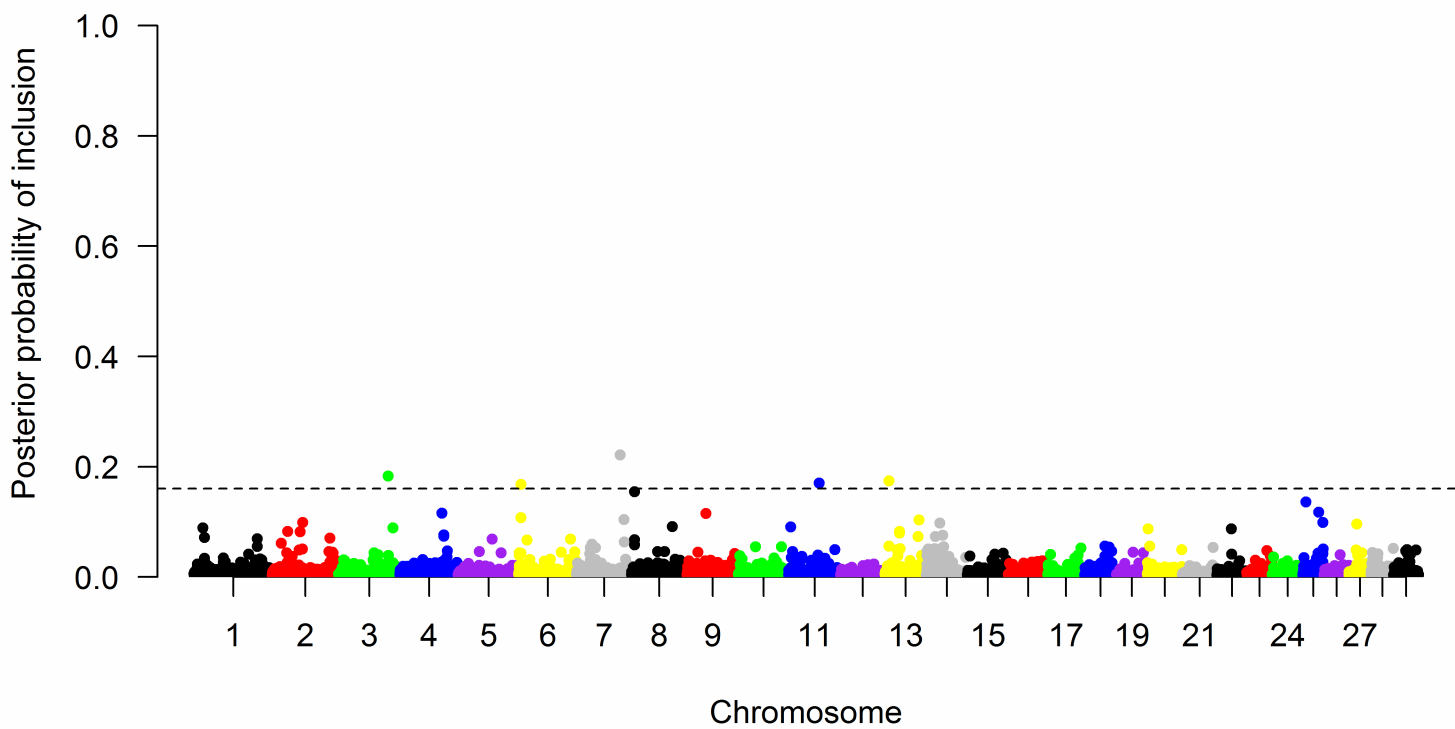

### 13c-18:1 in LL

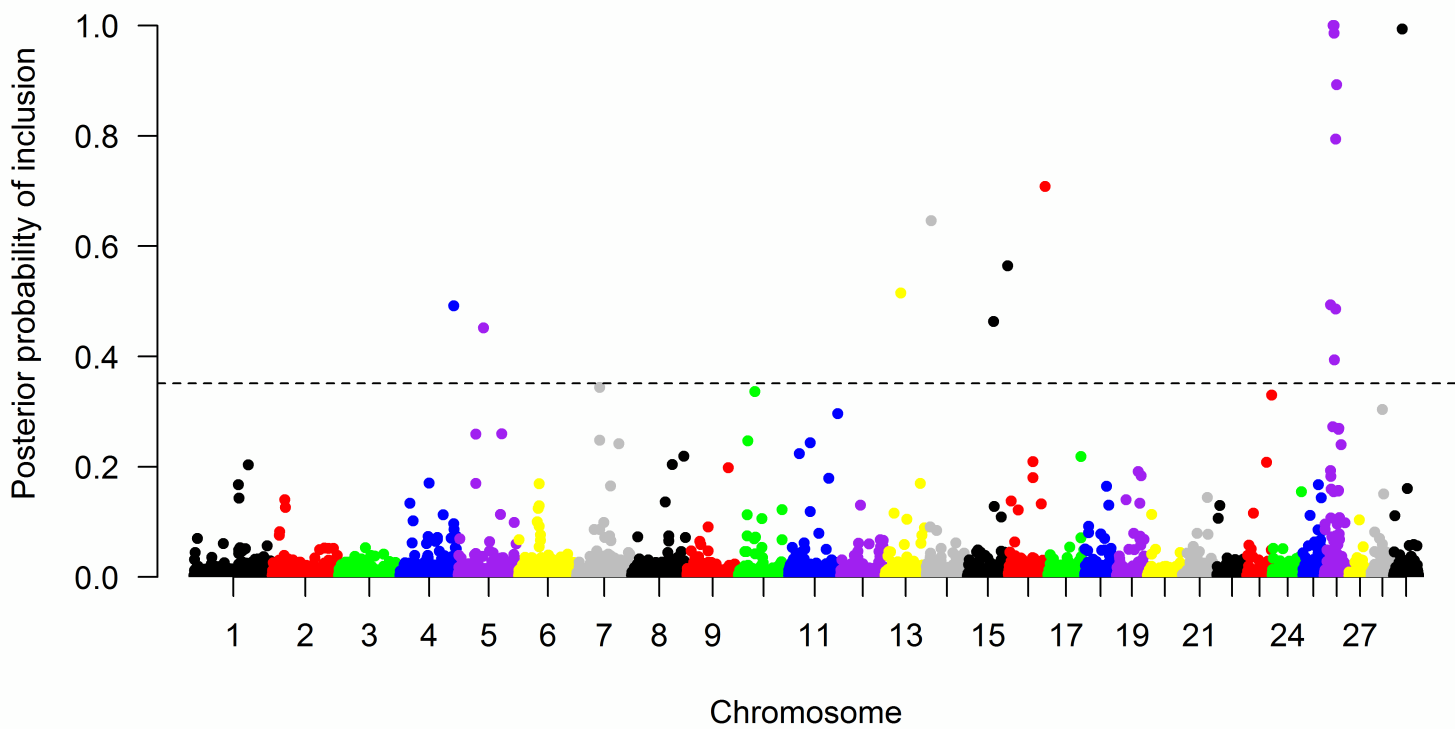

### 13c-18:1 in SQ

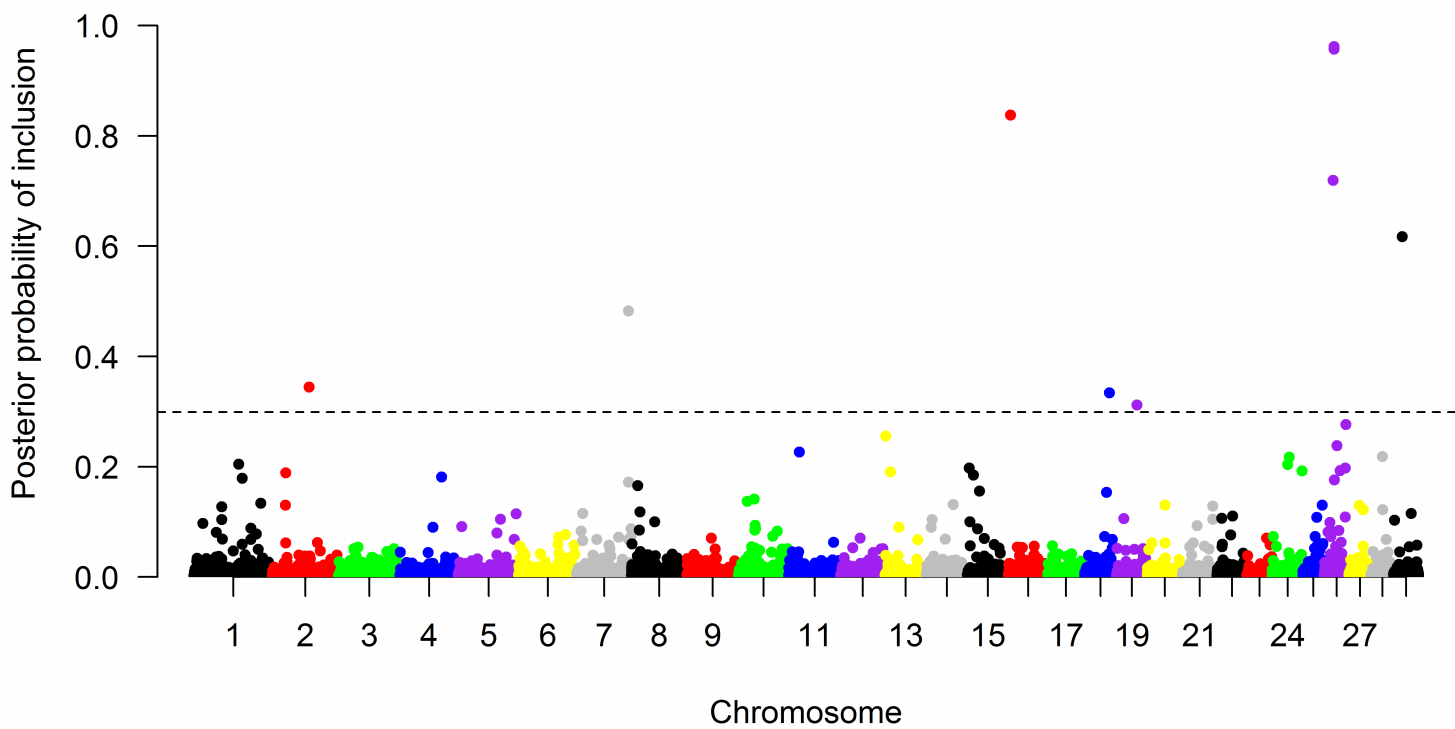

### 14c-18:1 in LL

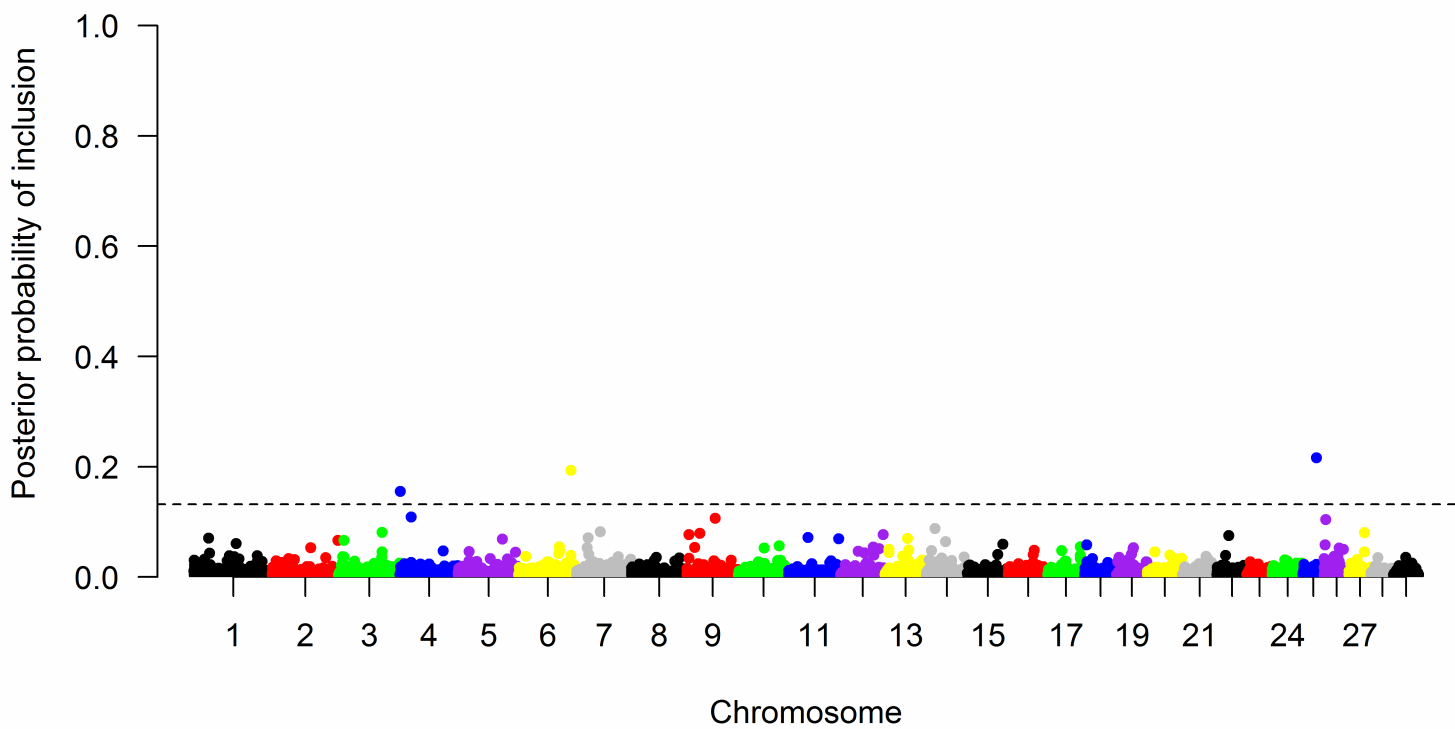

### 14c-18:1 in SQ

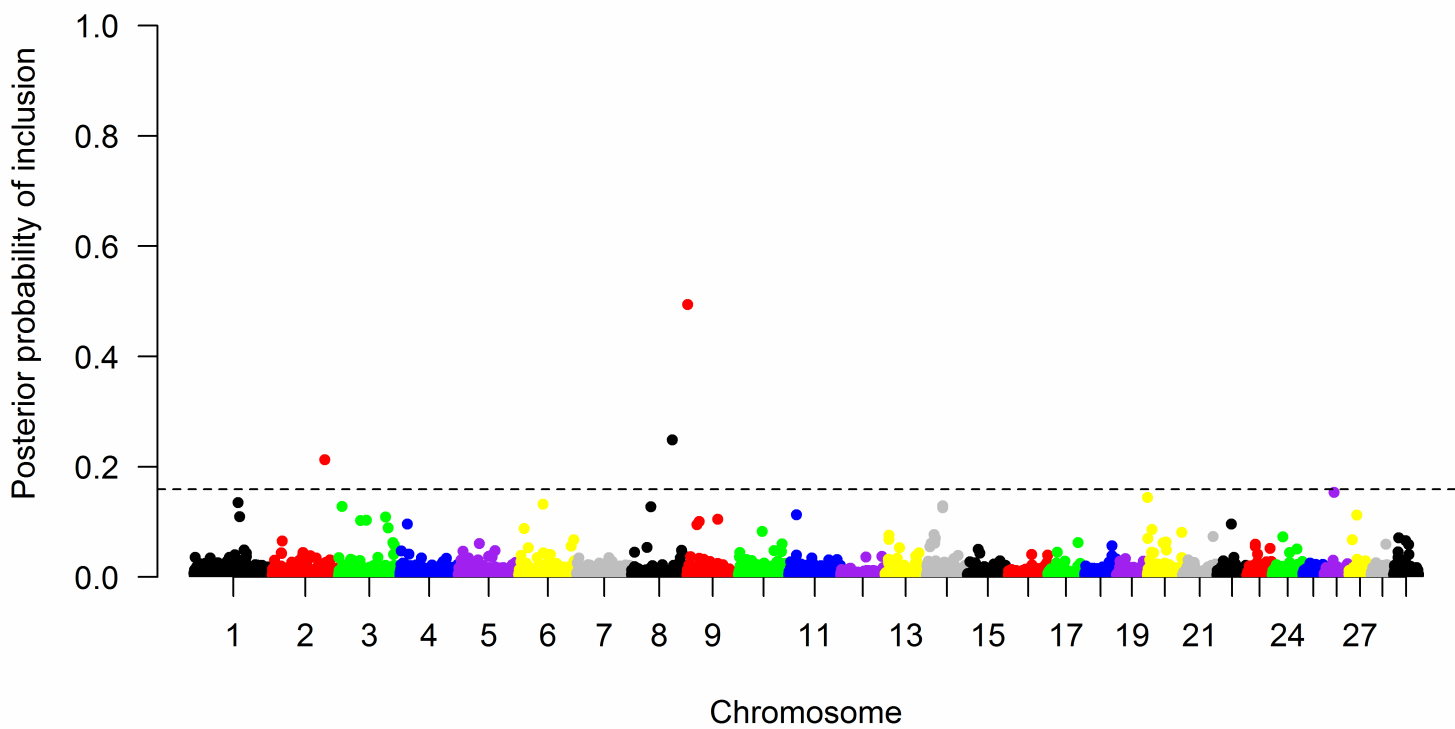

### 15c-18:1 in LL

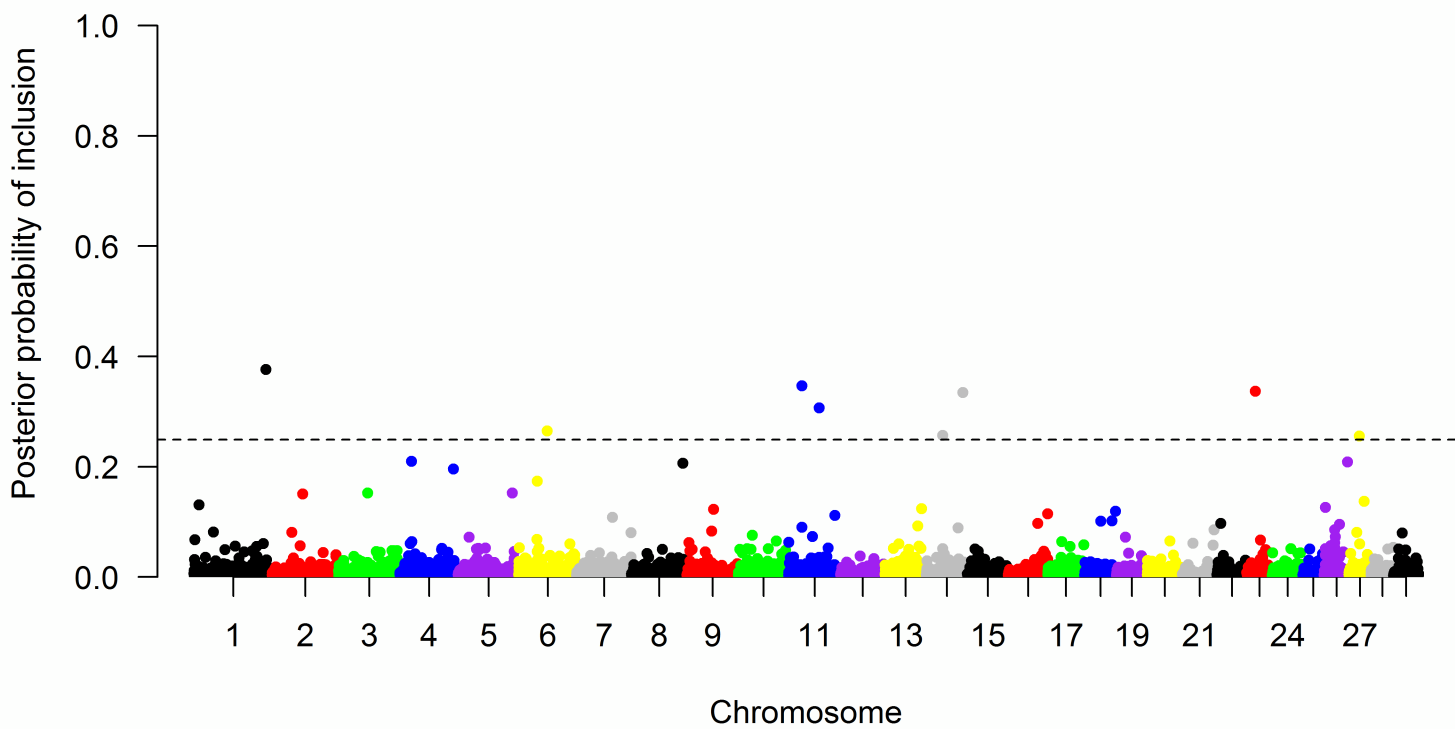

### 15c-18:1 in SQ

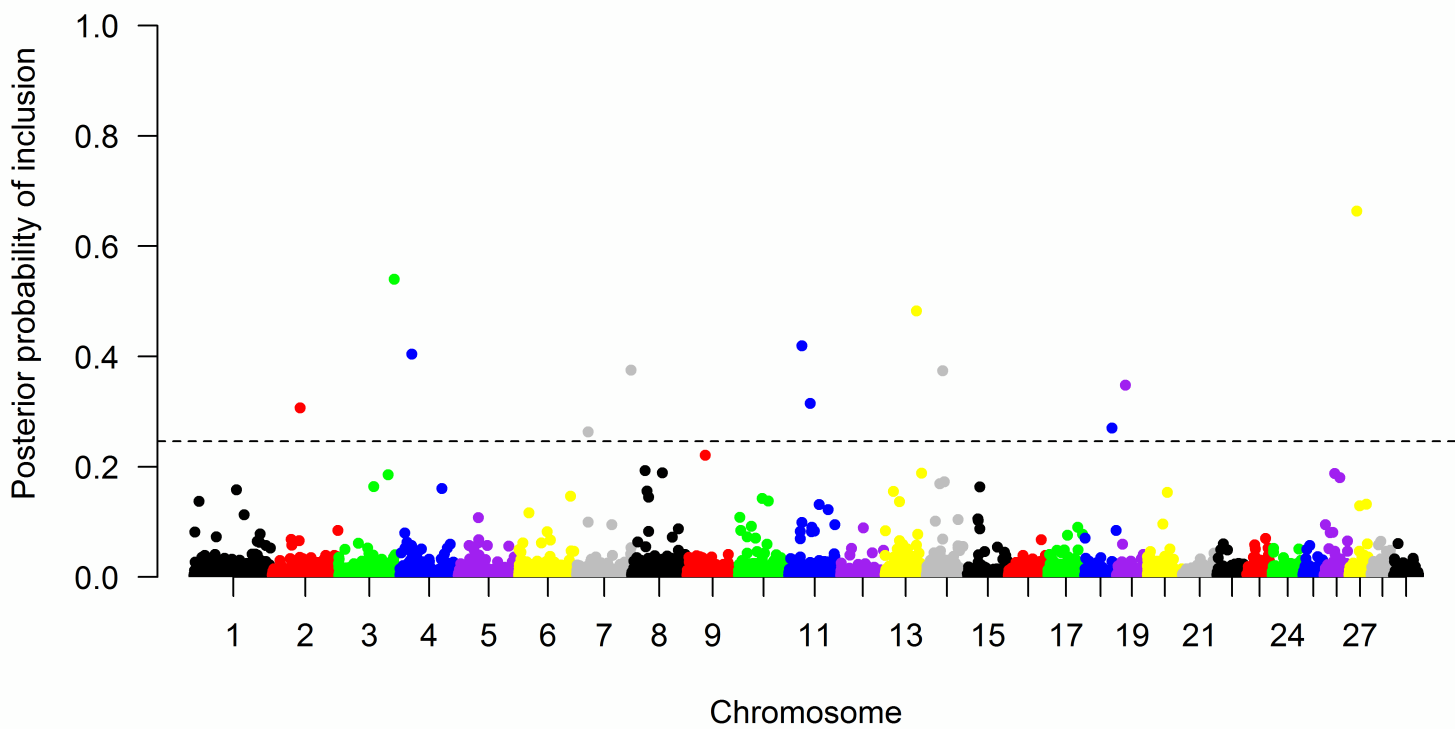

### 6t/8t-18:1 in LL

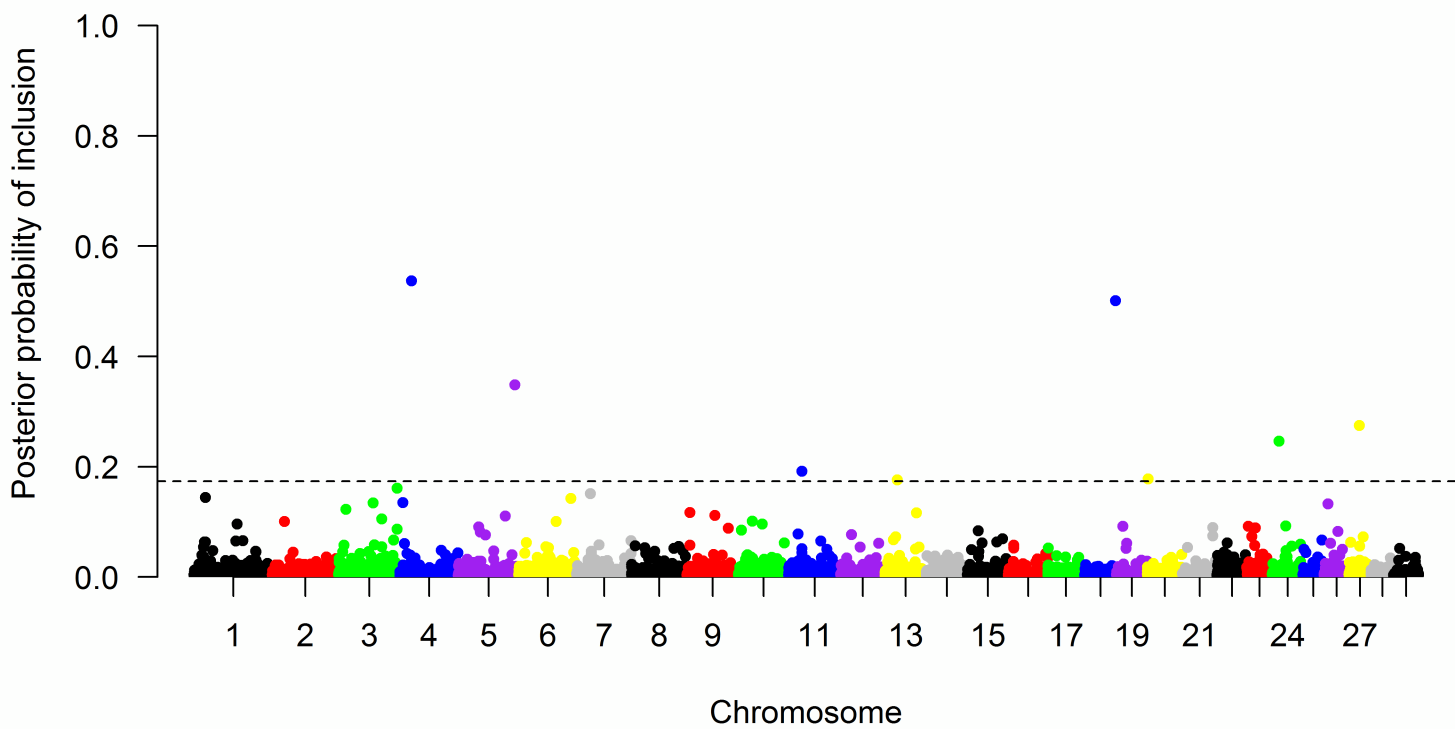

### 6t/8t-18:1 in SQ

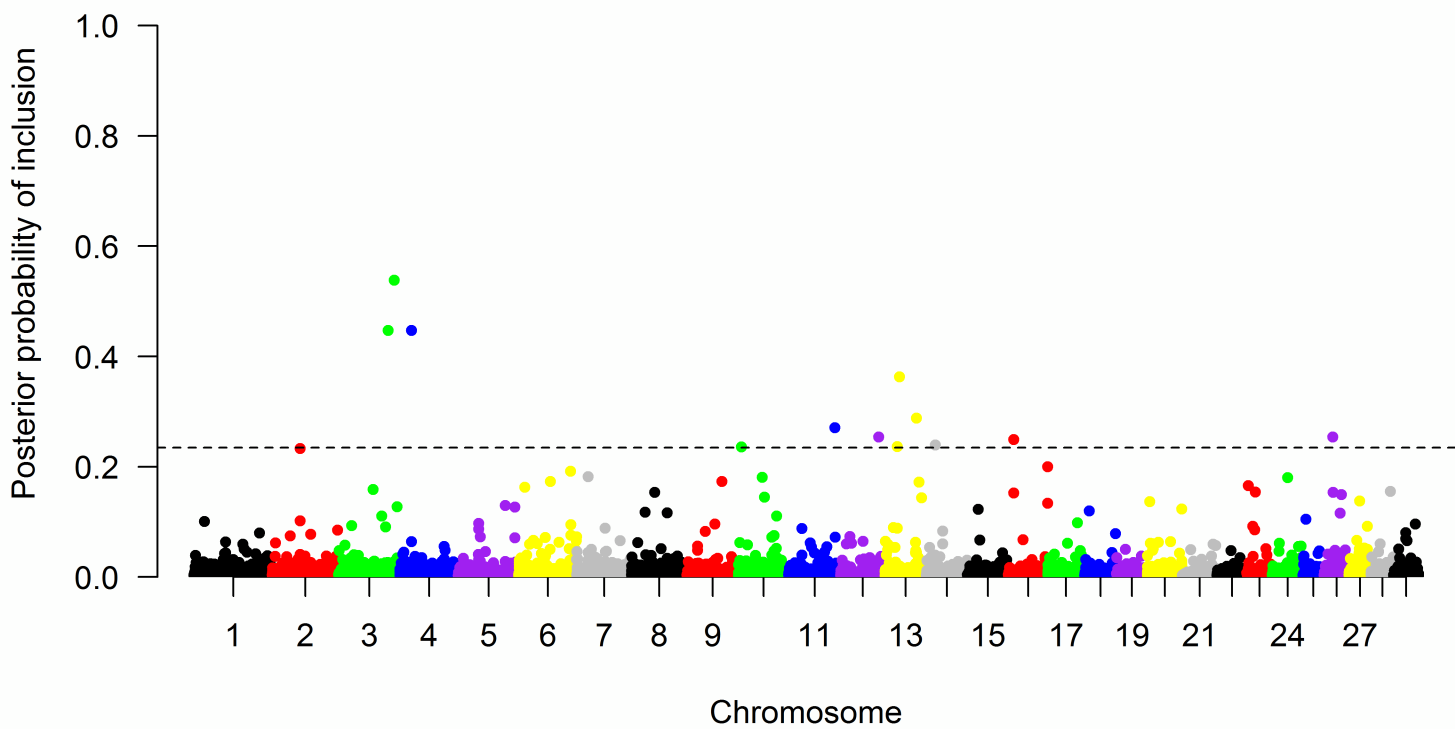

### 9t-18:1 in LL

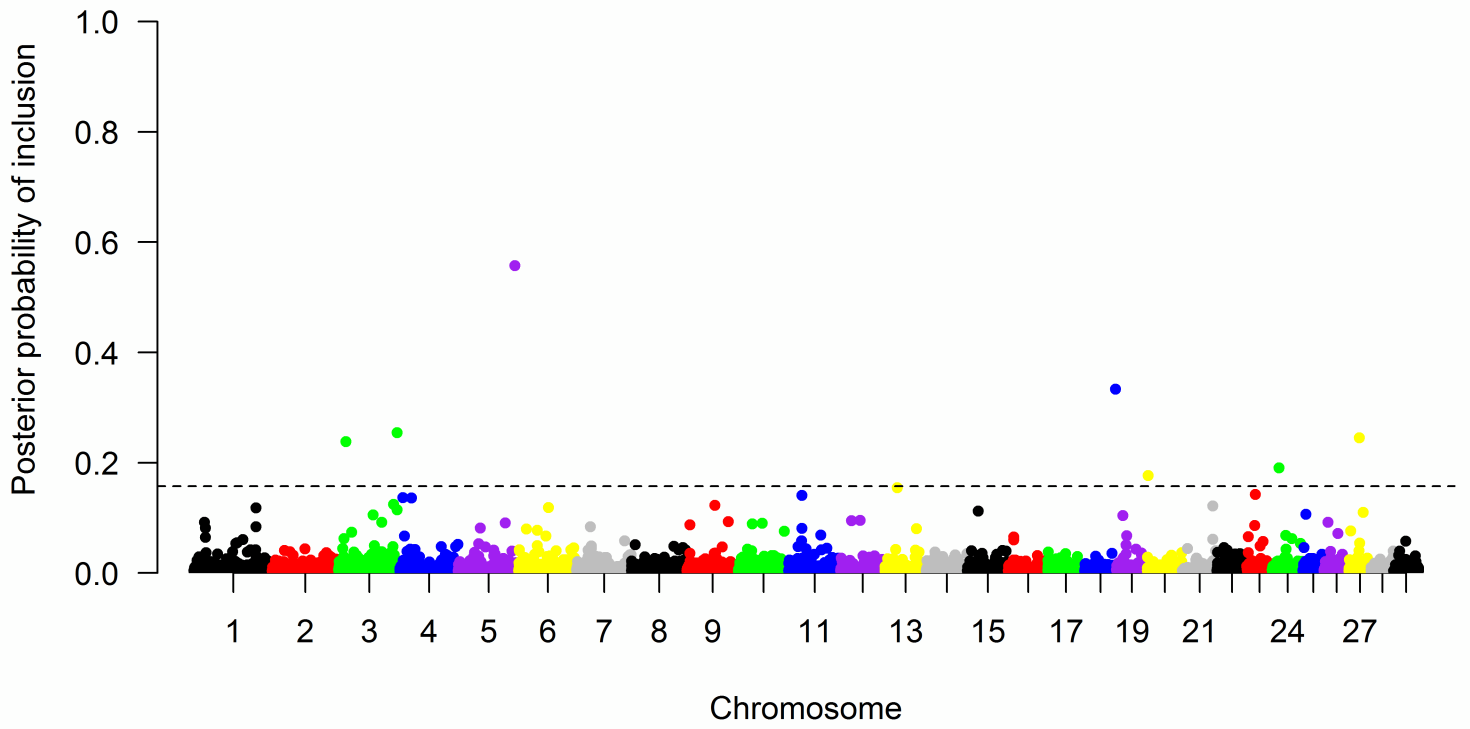

### 9t-18:1 in SQ

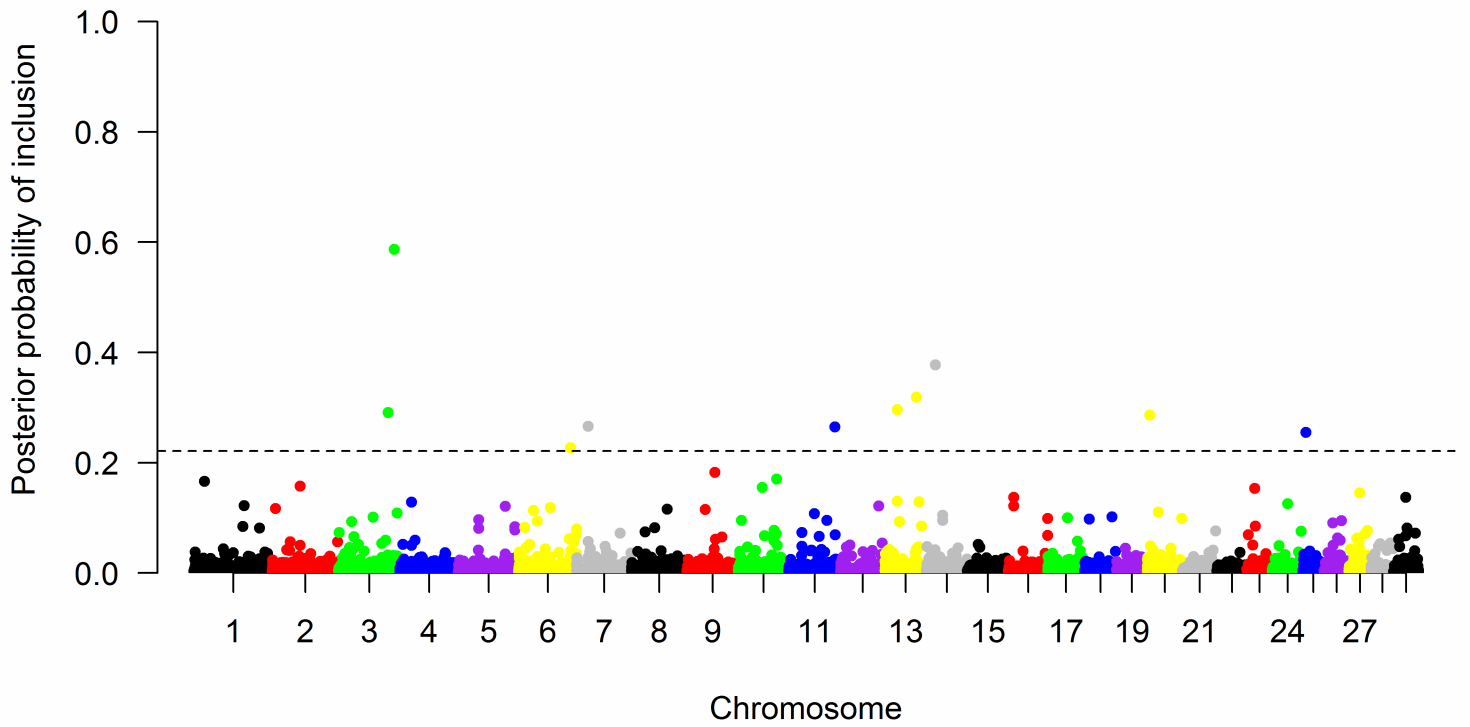

### 10t-18:1 in LL

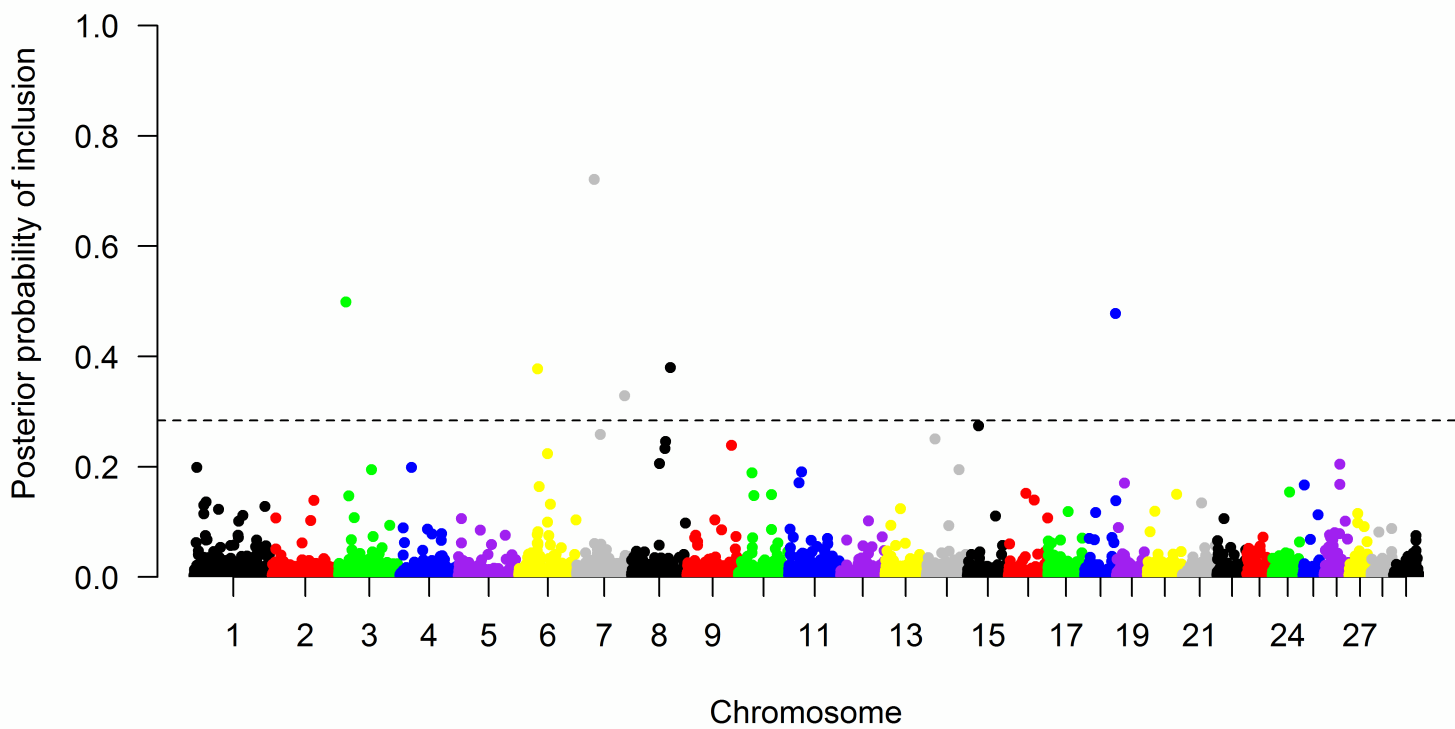

### 10t-18:1 in SQ

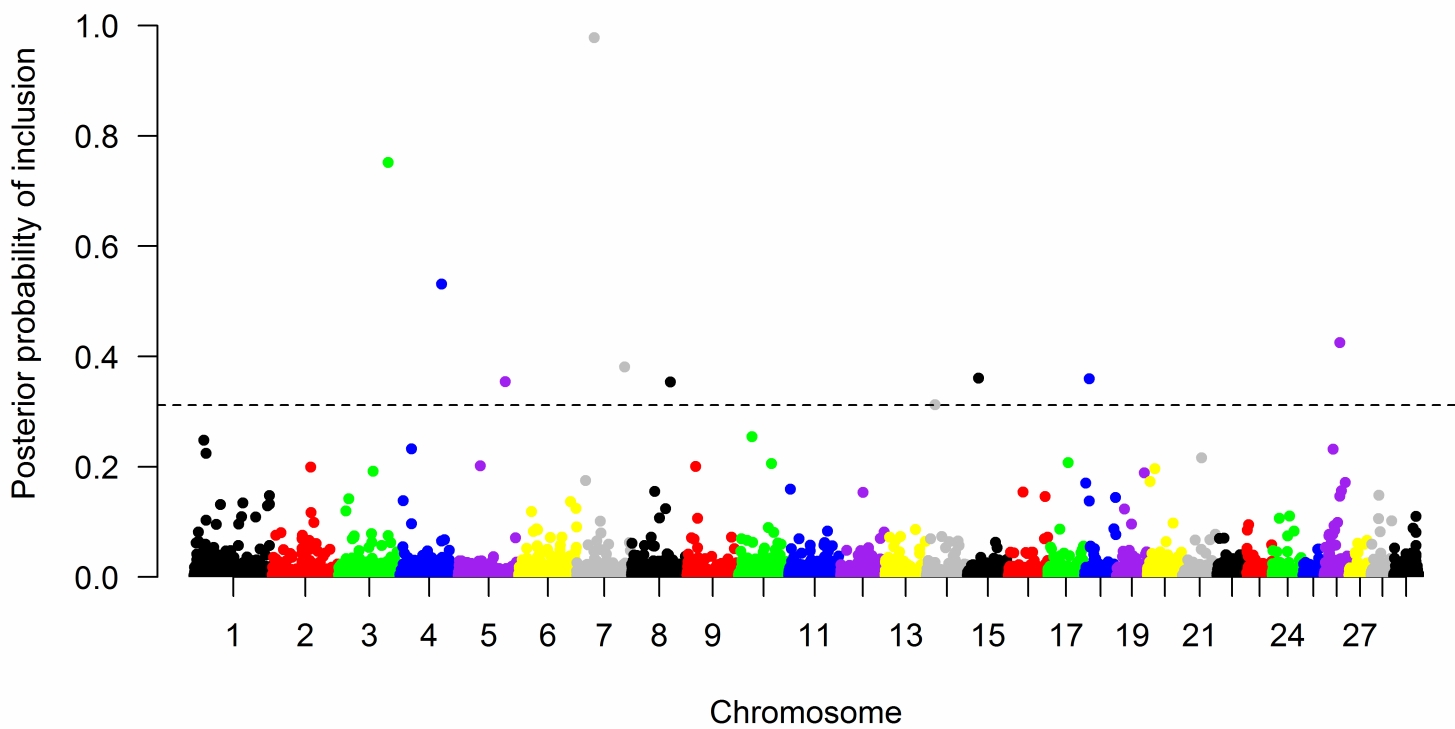

### 11t-18:1 in LL

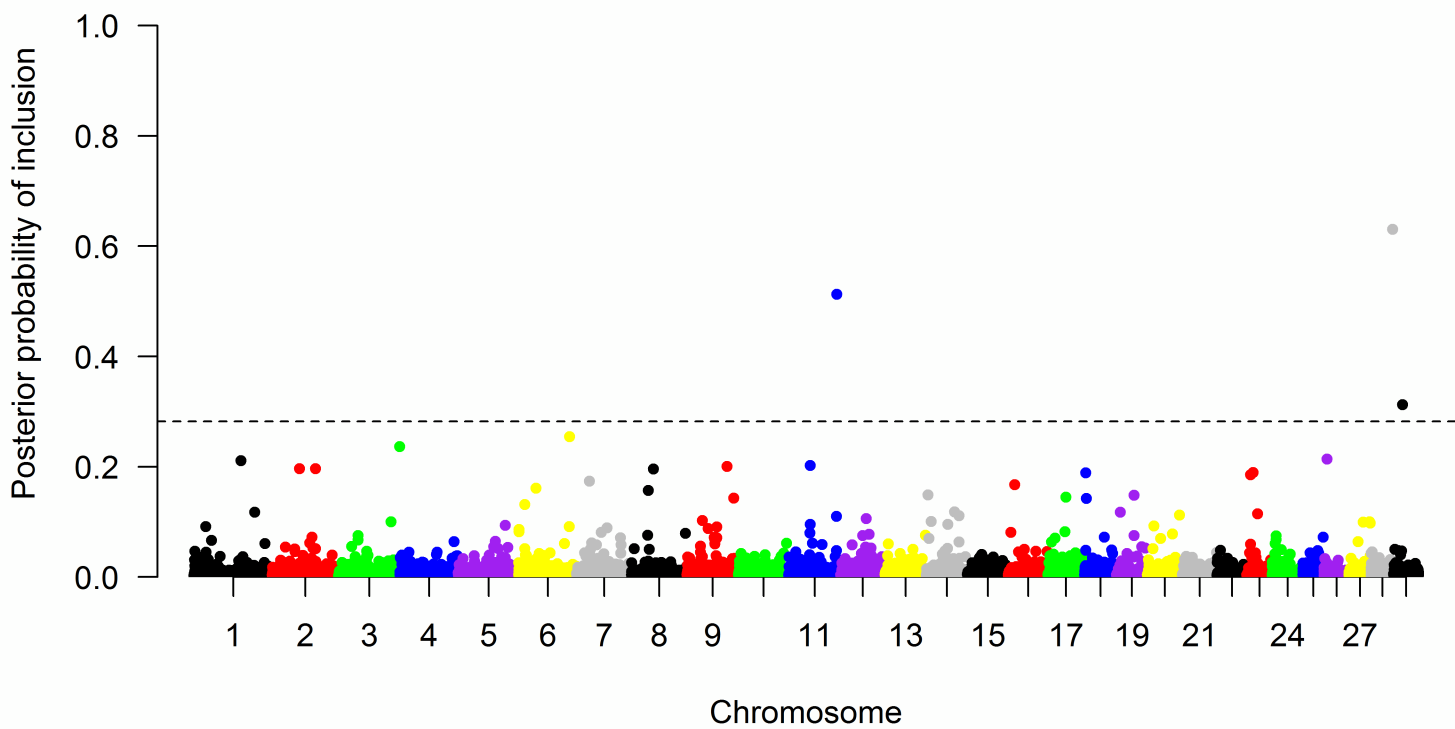

### 11t-18:1 in SQ

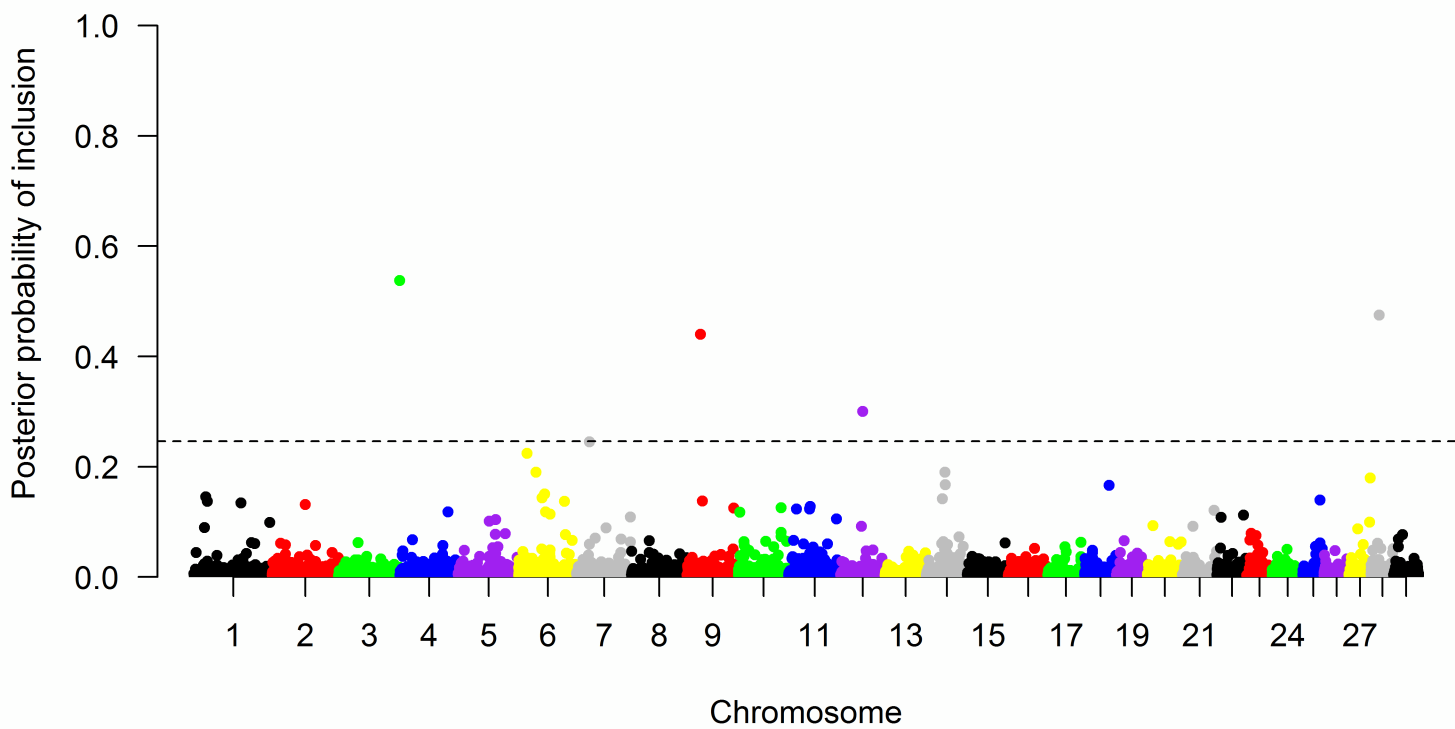



### 12t-18:1 in LL

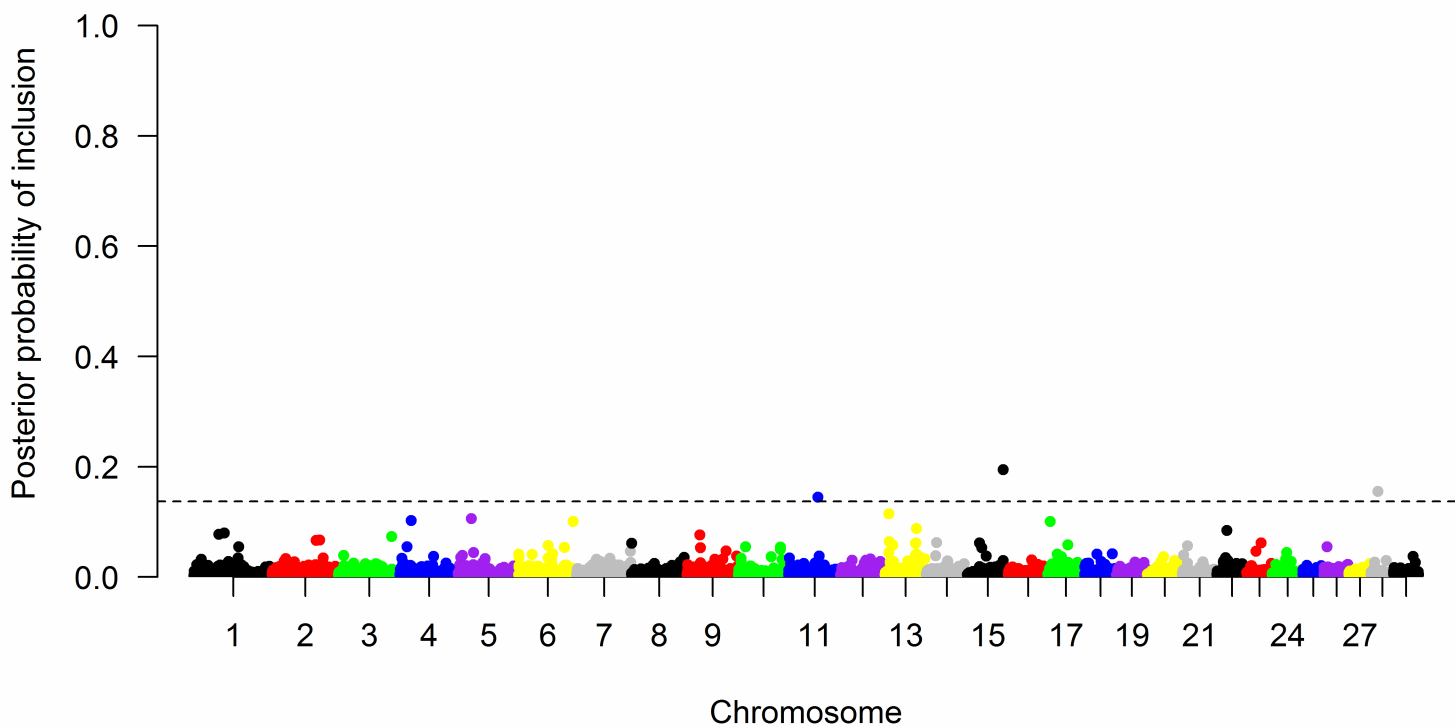

### 12t-18:1 in SQ

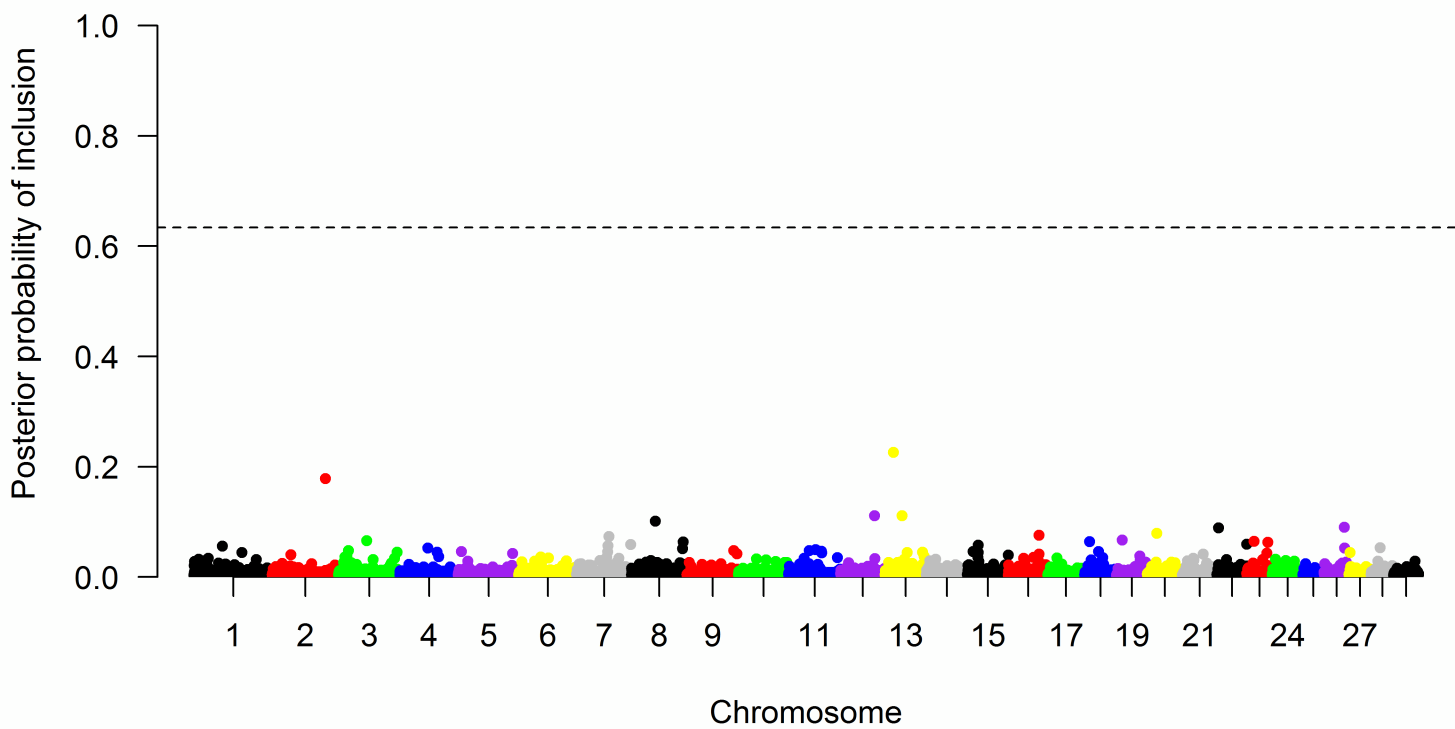

### 15t-18:1 in LL

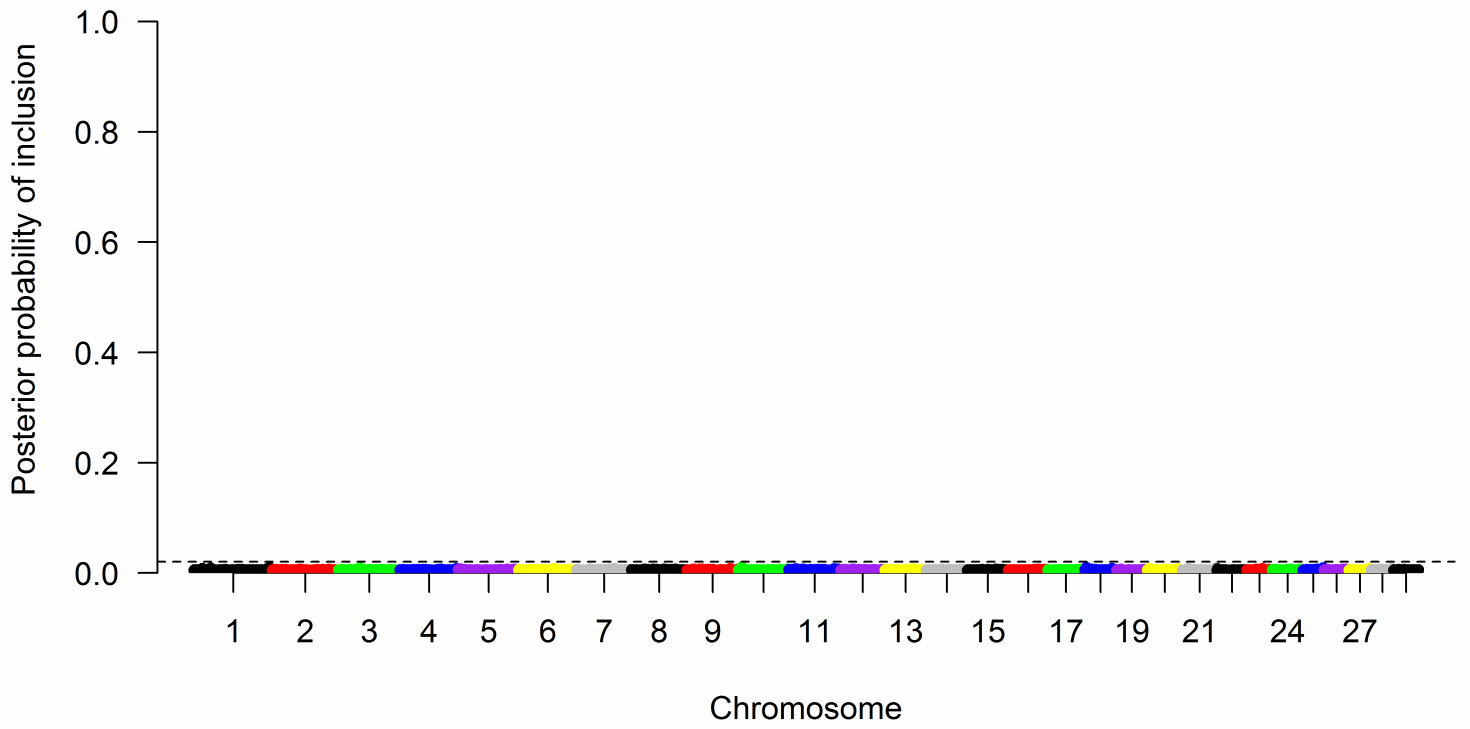

### 15t-18:1 in SQ

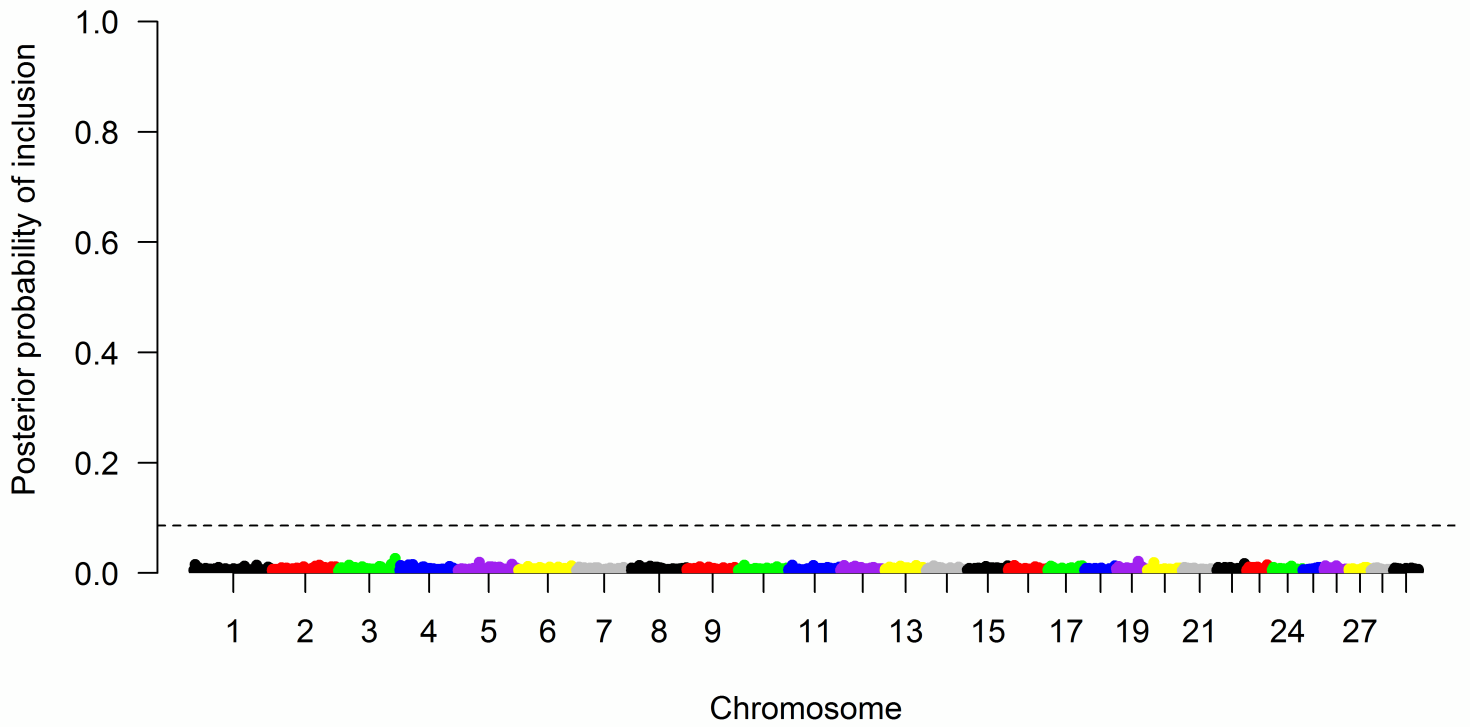

### 16t-18:1 in LL

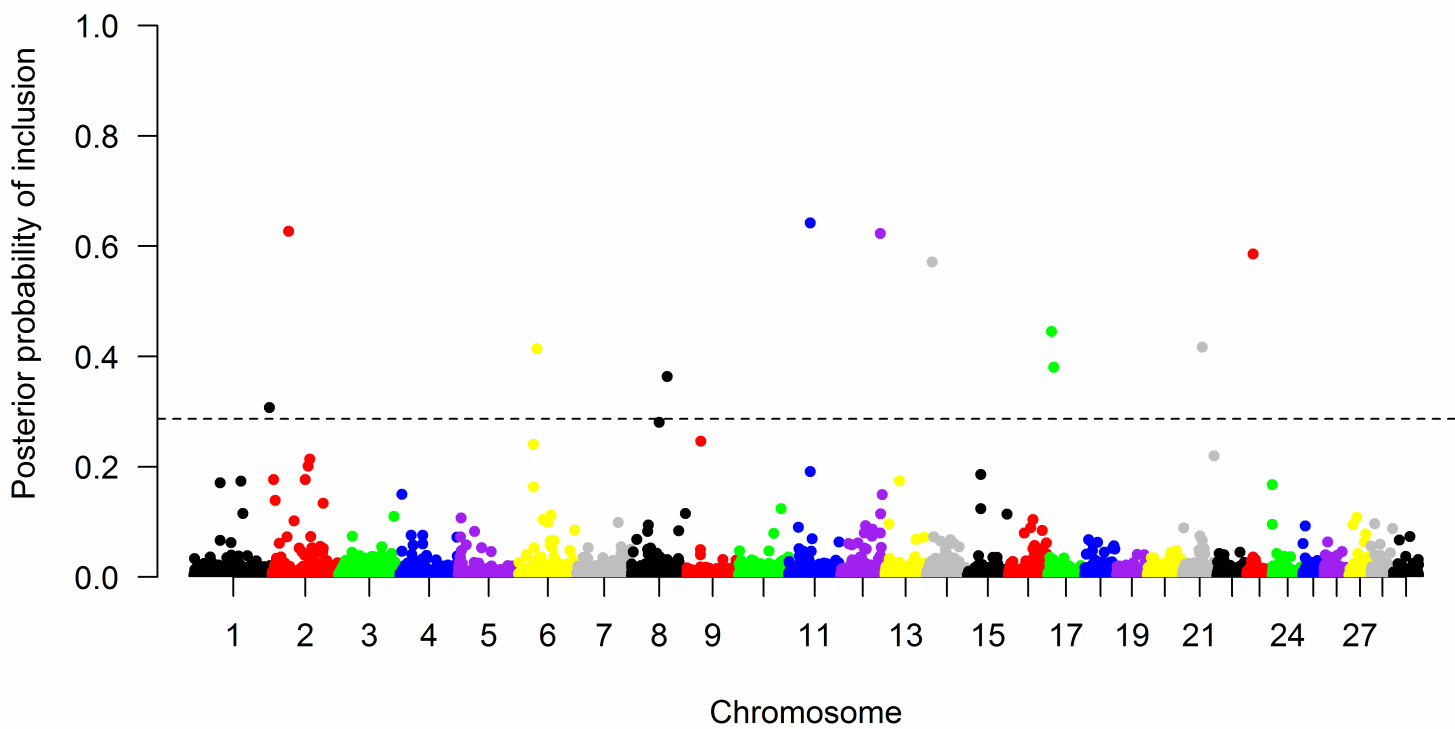

### 16t-18:1 in SQ

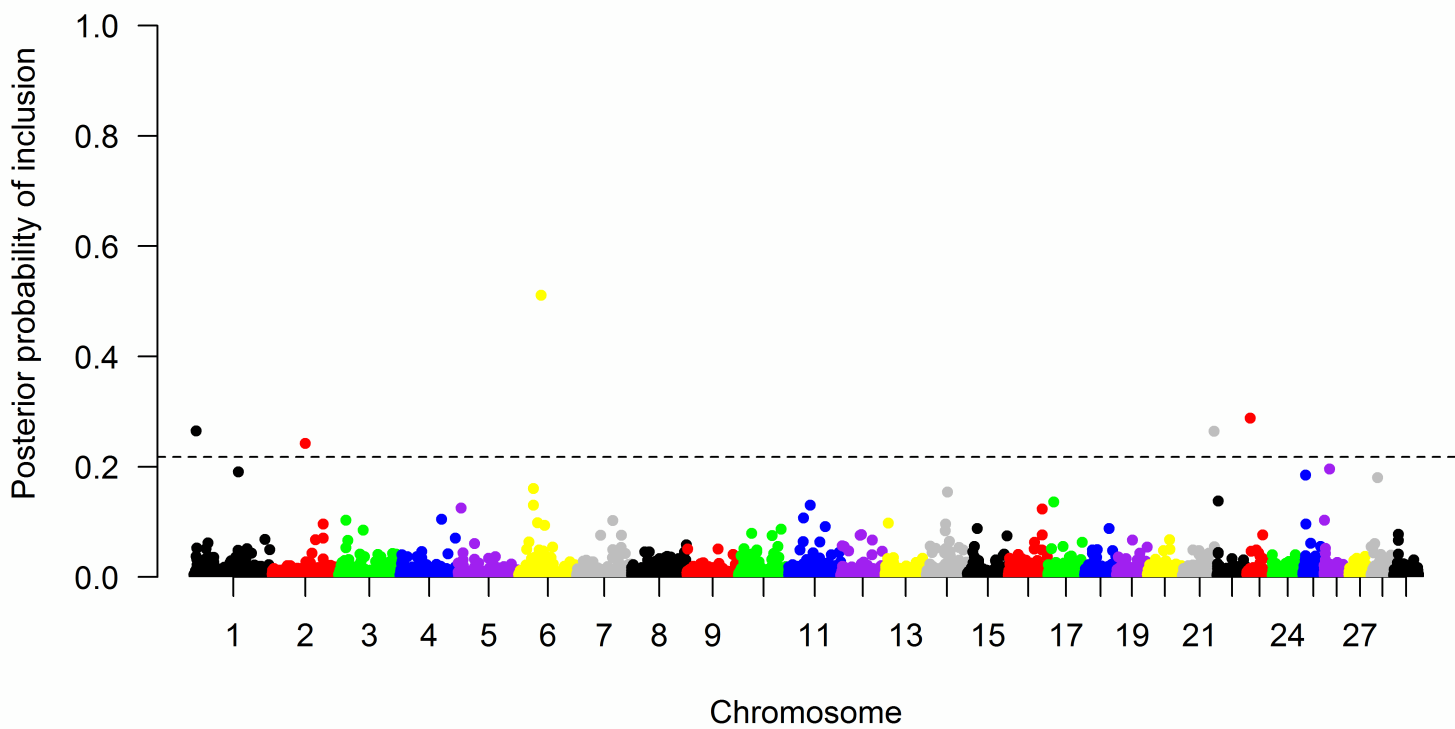

### sumtrans18:1 in LL

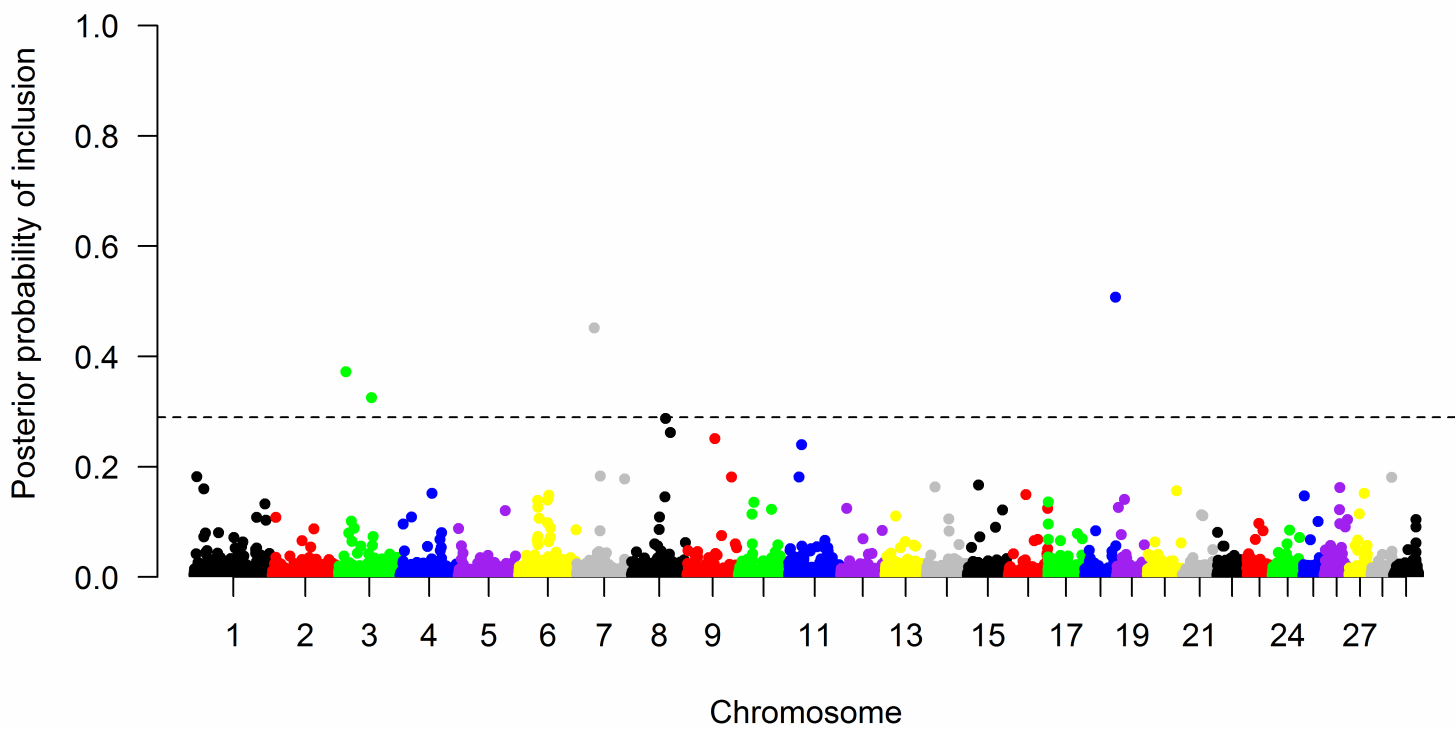

### sumtrans18:1 in SQ

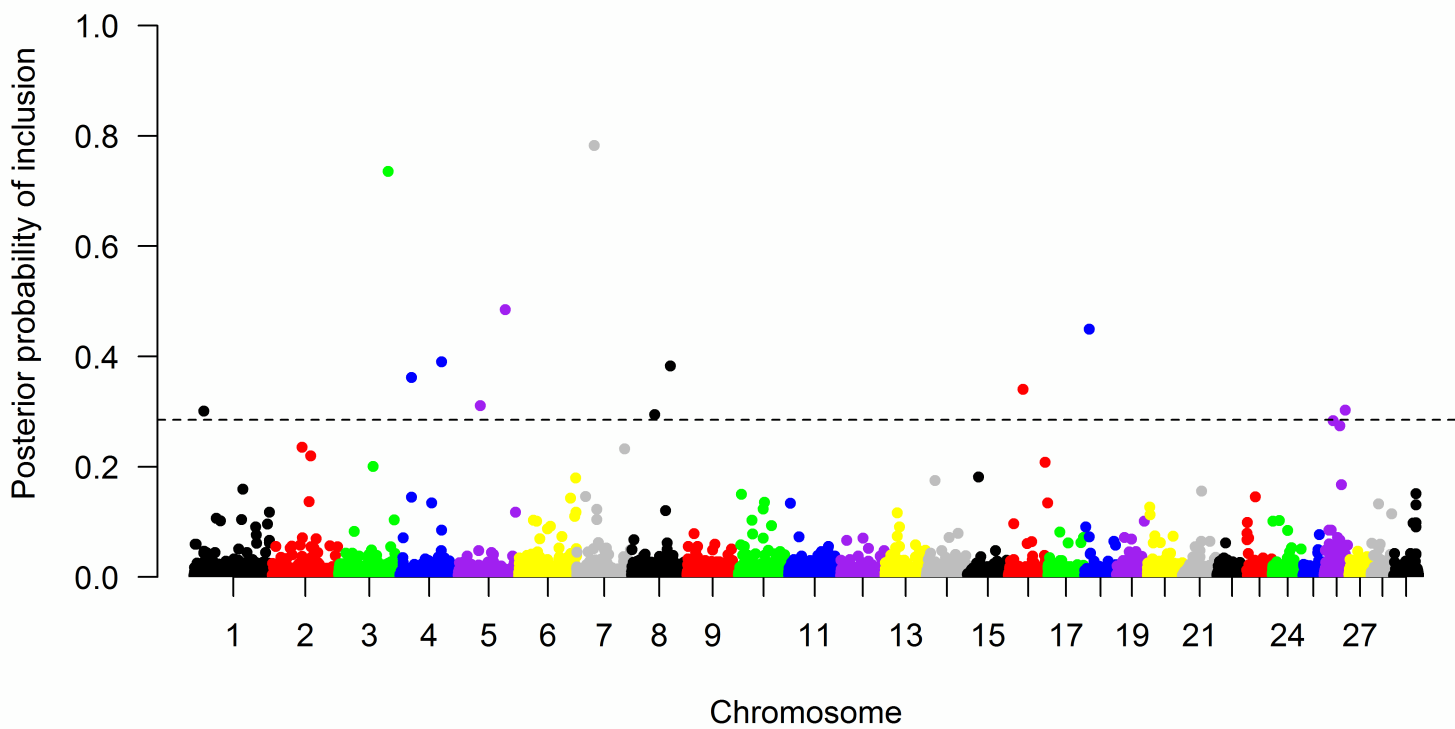

### 9c-20:1 in LL

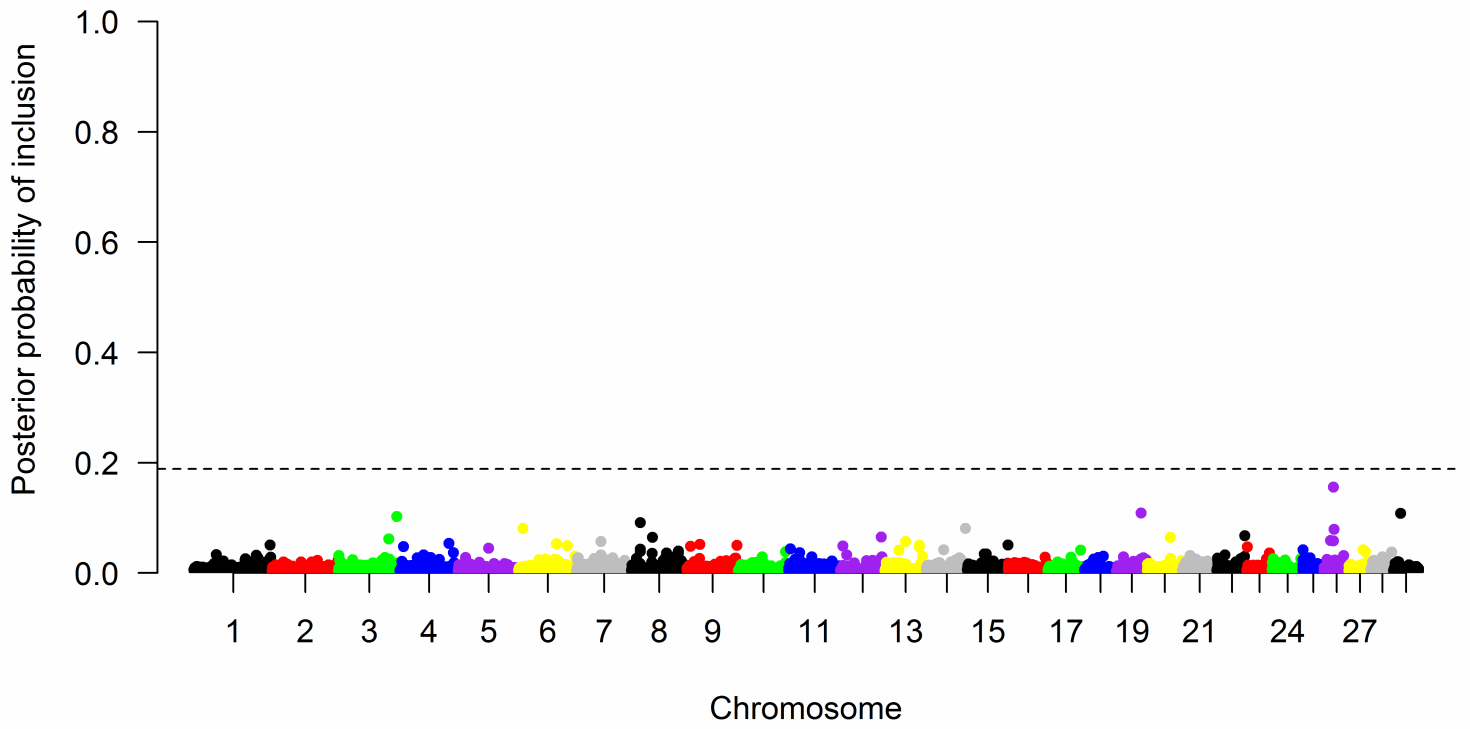

### 9c-20:1 in SQ

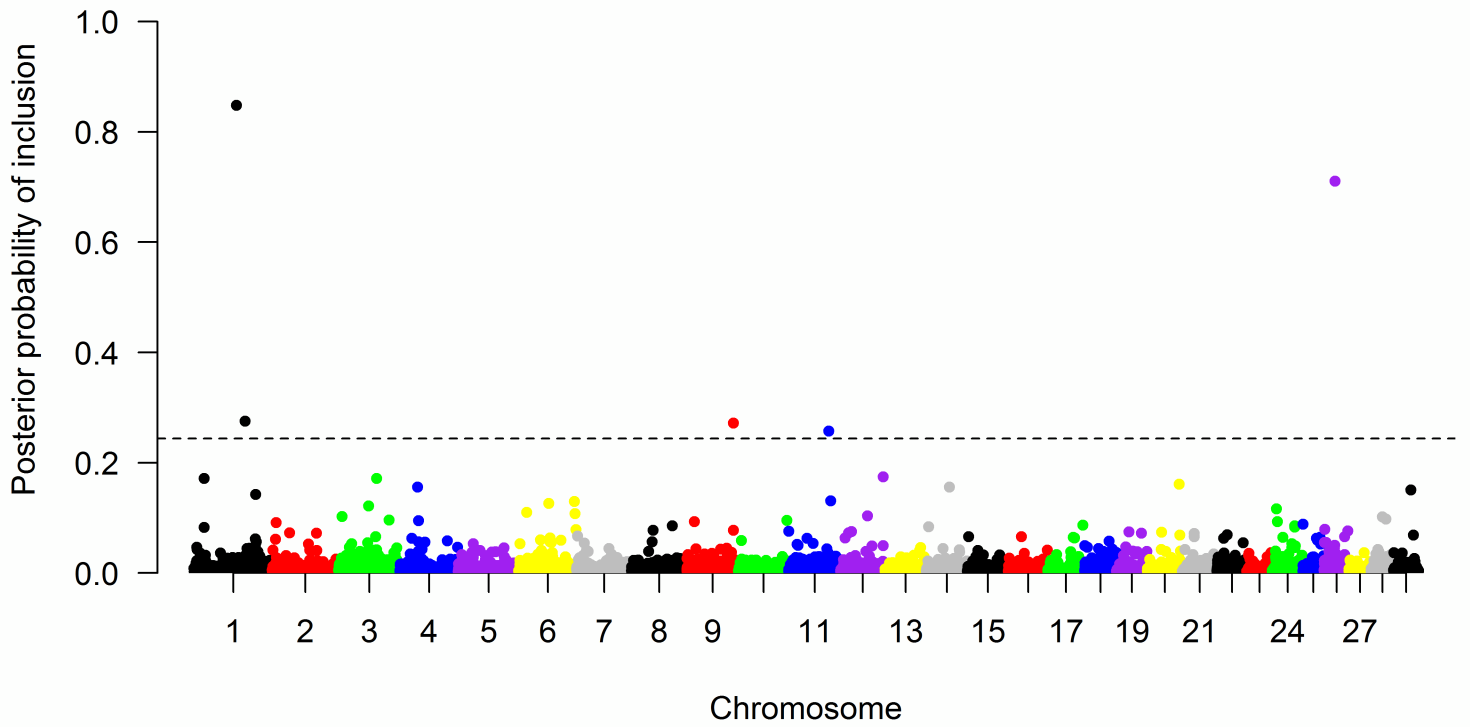

### 11c-20:1 in LL

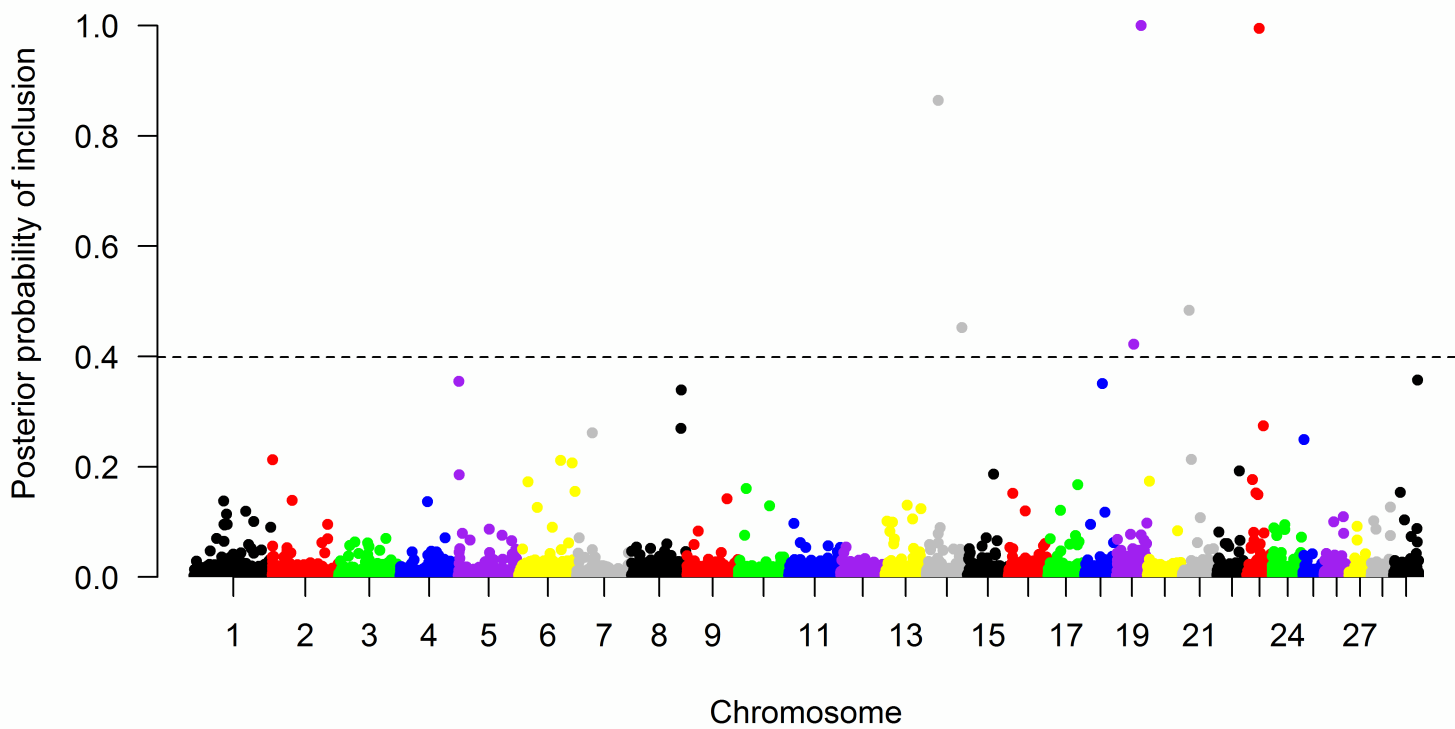

### 11c-20:1 in SQ

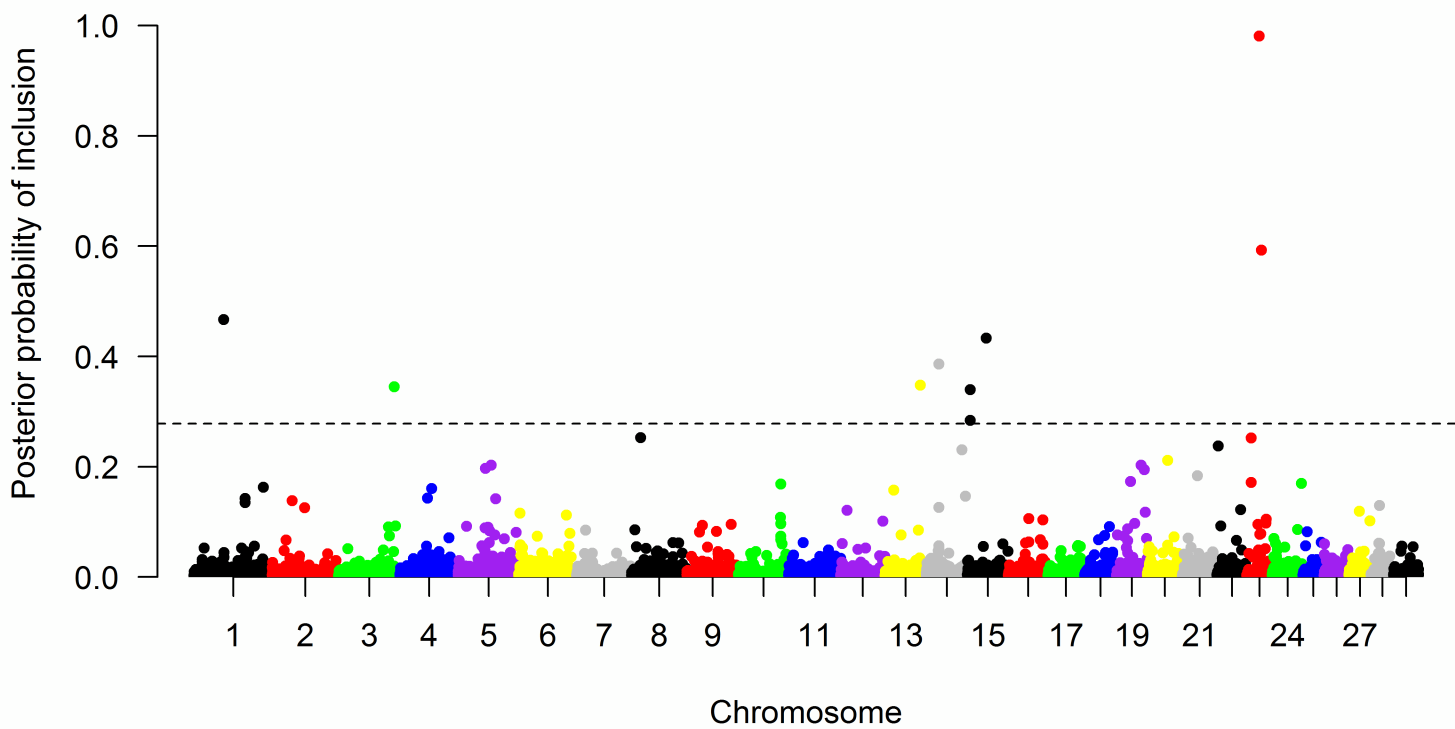

### MUFA in LL

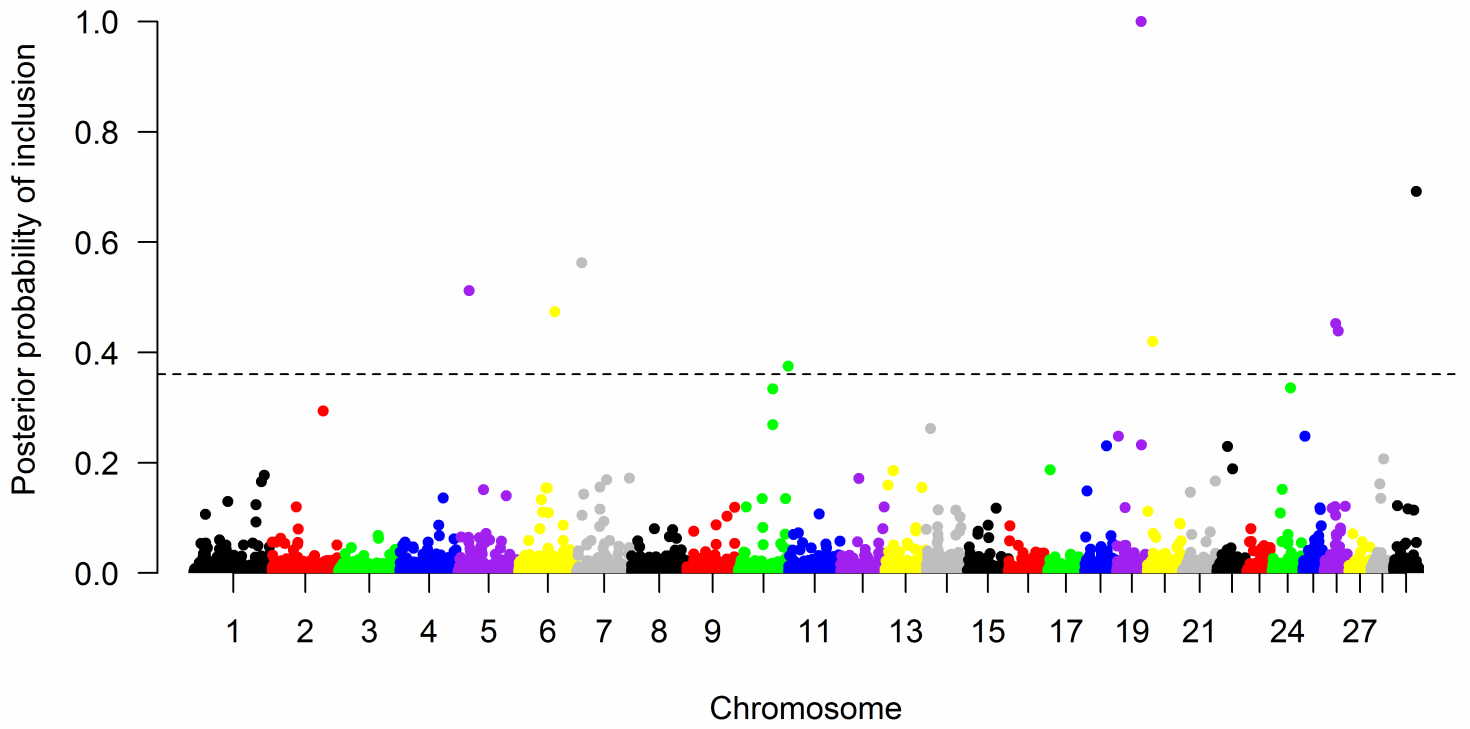

### MUFA in SQ

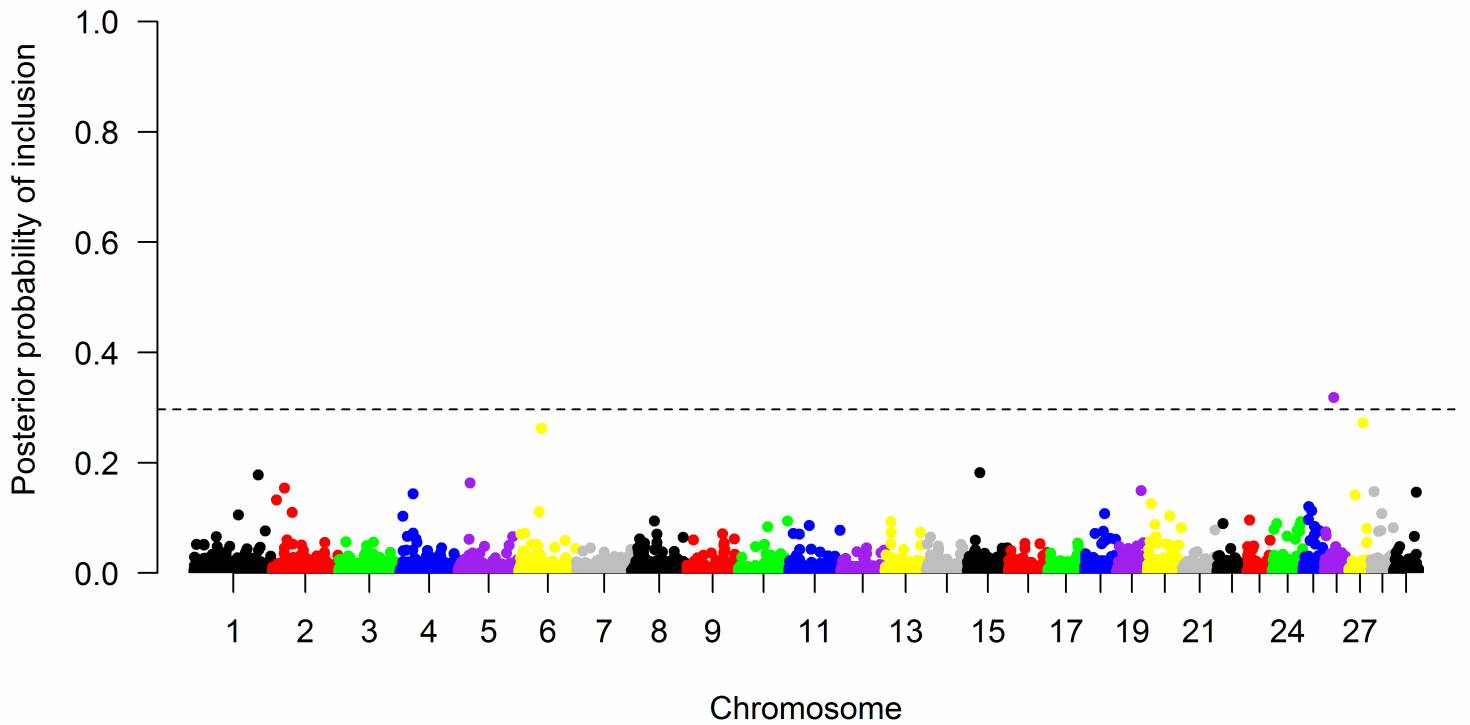

### 9c,13t/8t,12c-18:2 in LL

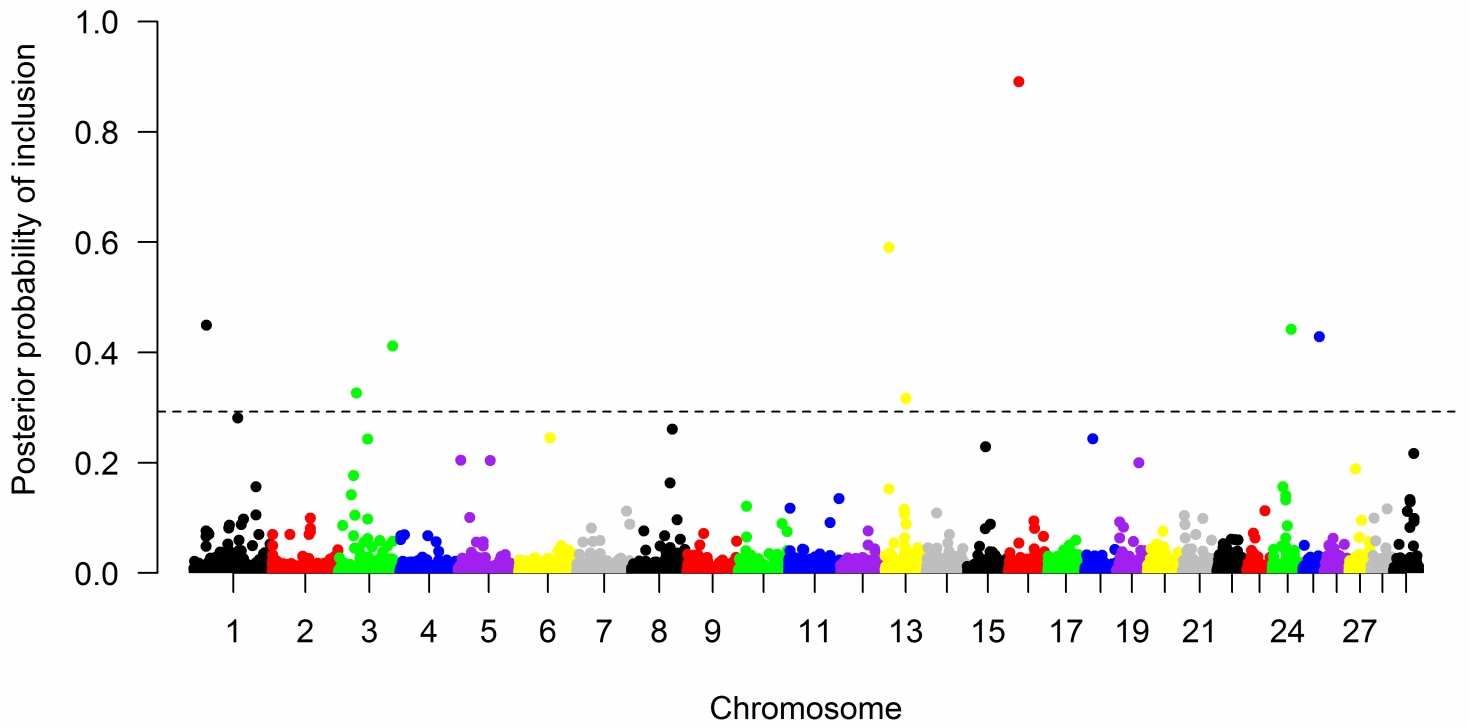

### 9c,13t/8t,12c-18:2 in SQ

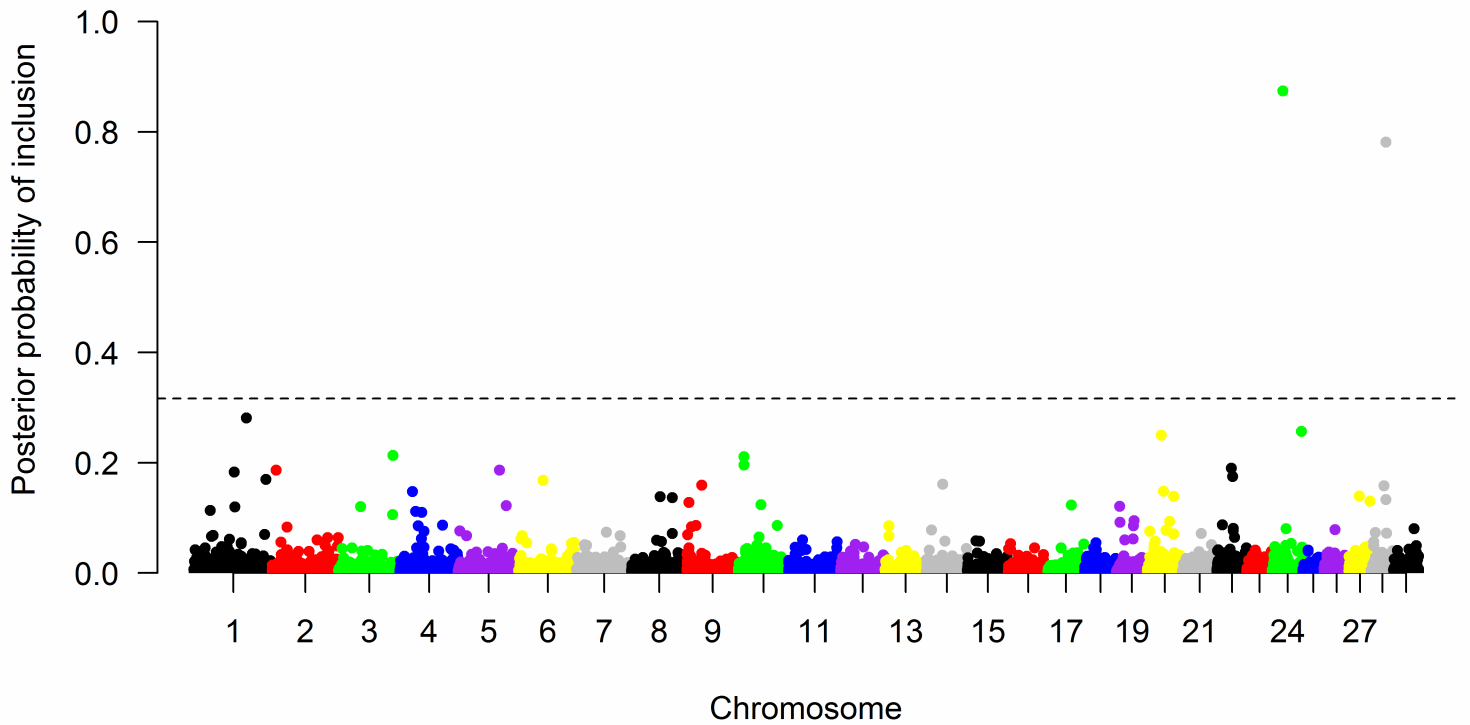



### 9c,15c-18:2 in LL

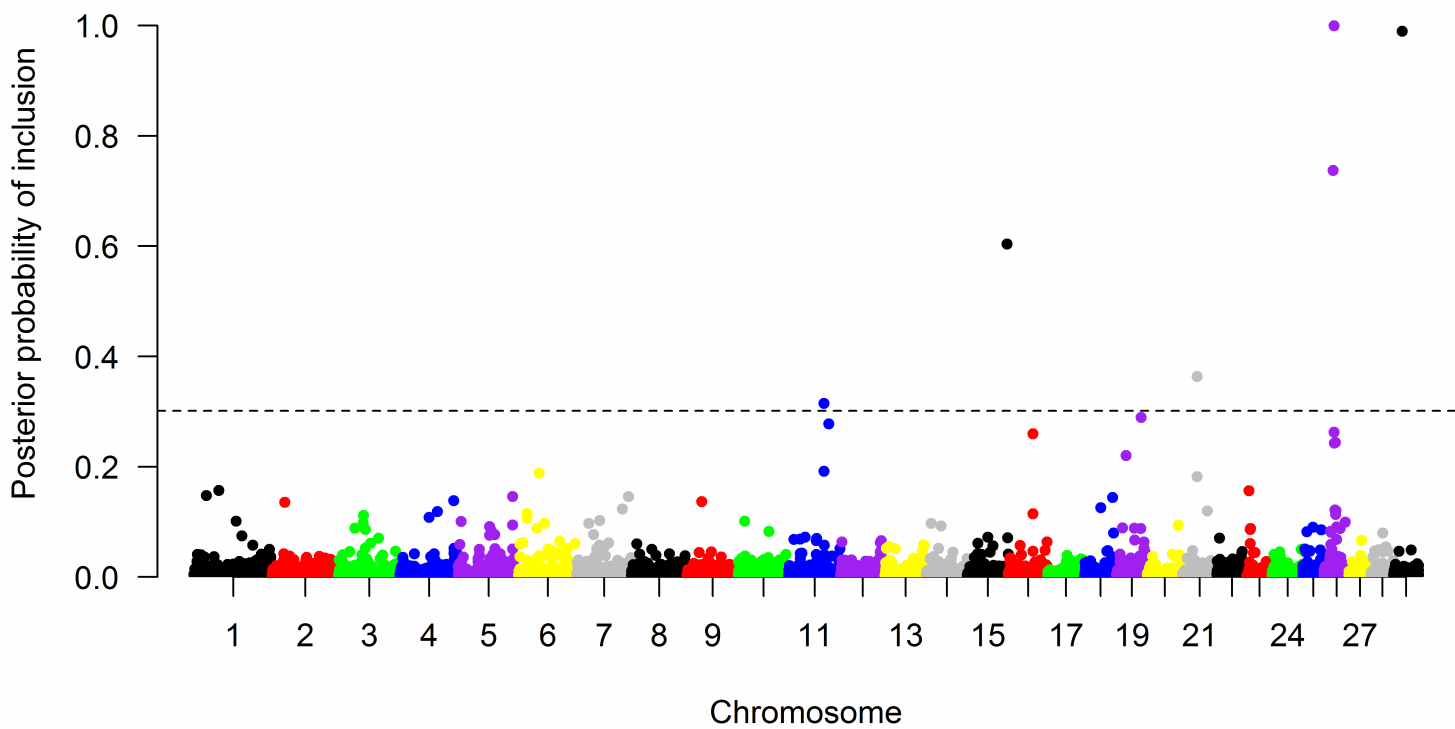

### 8t,13c-18:2 in LL

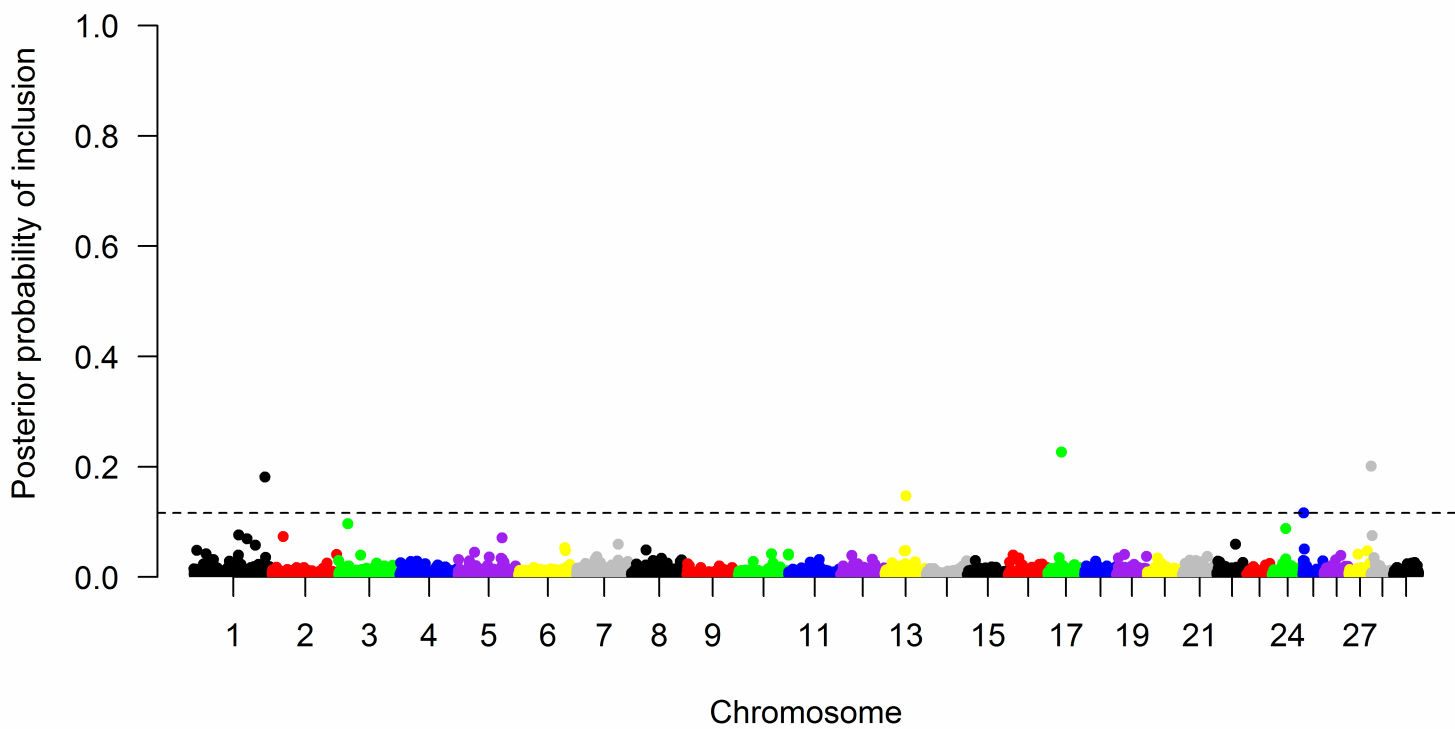

### 8t,13c-18:2 in SQ

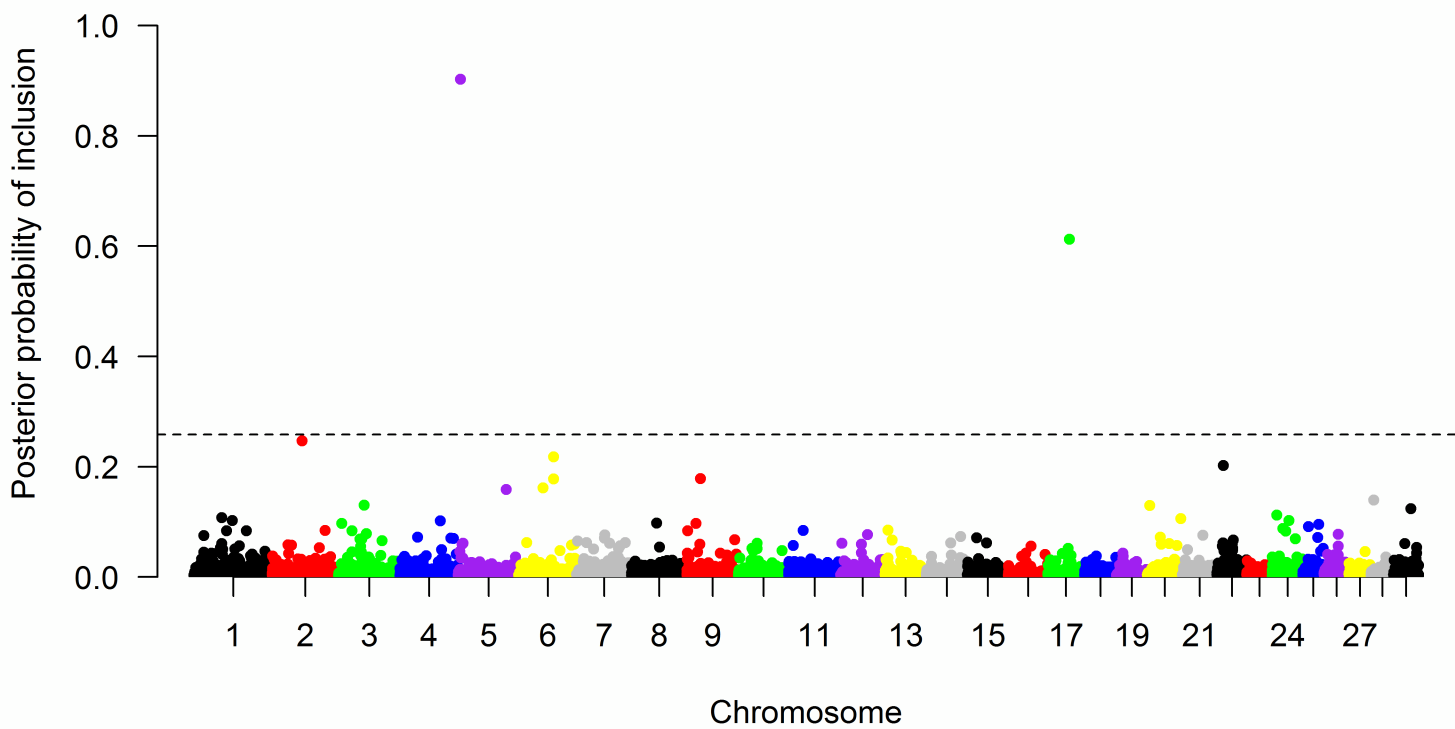

### 11t,15c-18:2 in LL

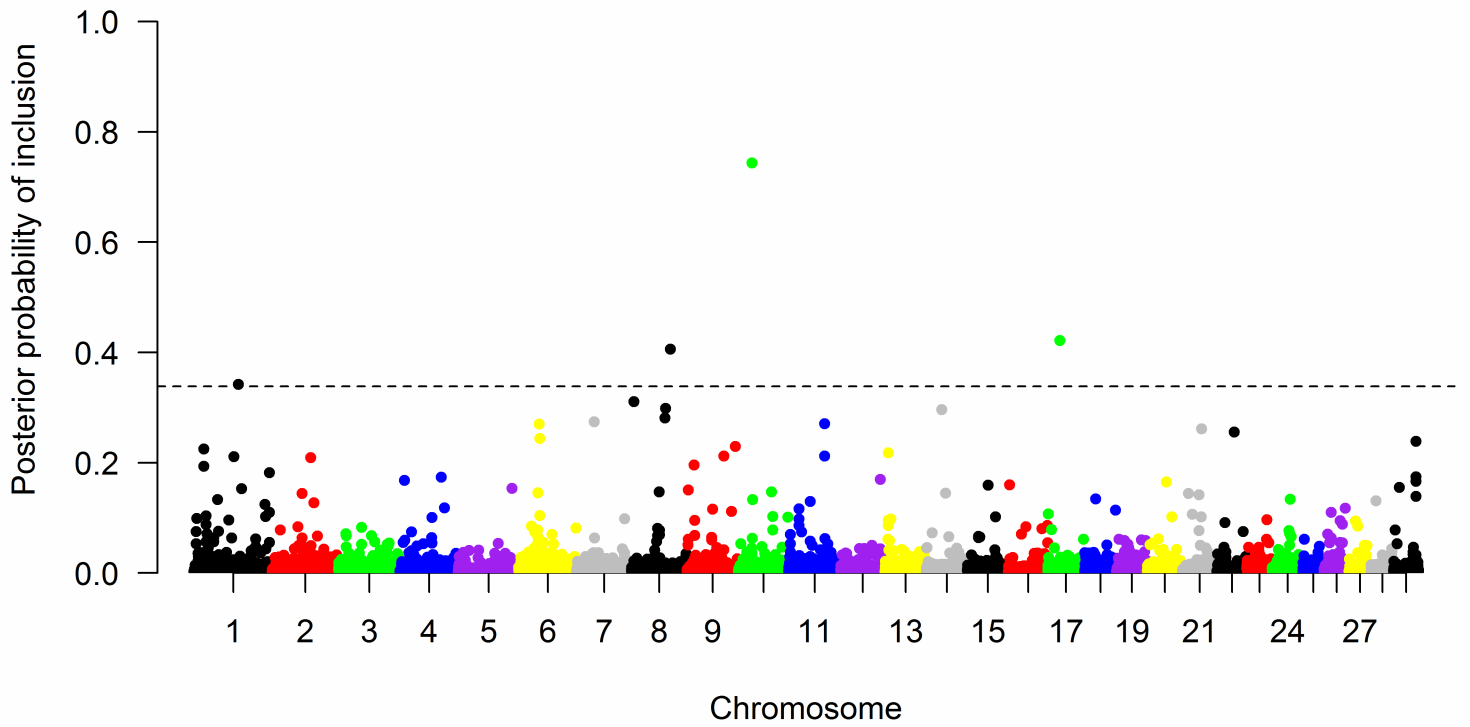

### 11t,15c-18:2 in SQ

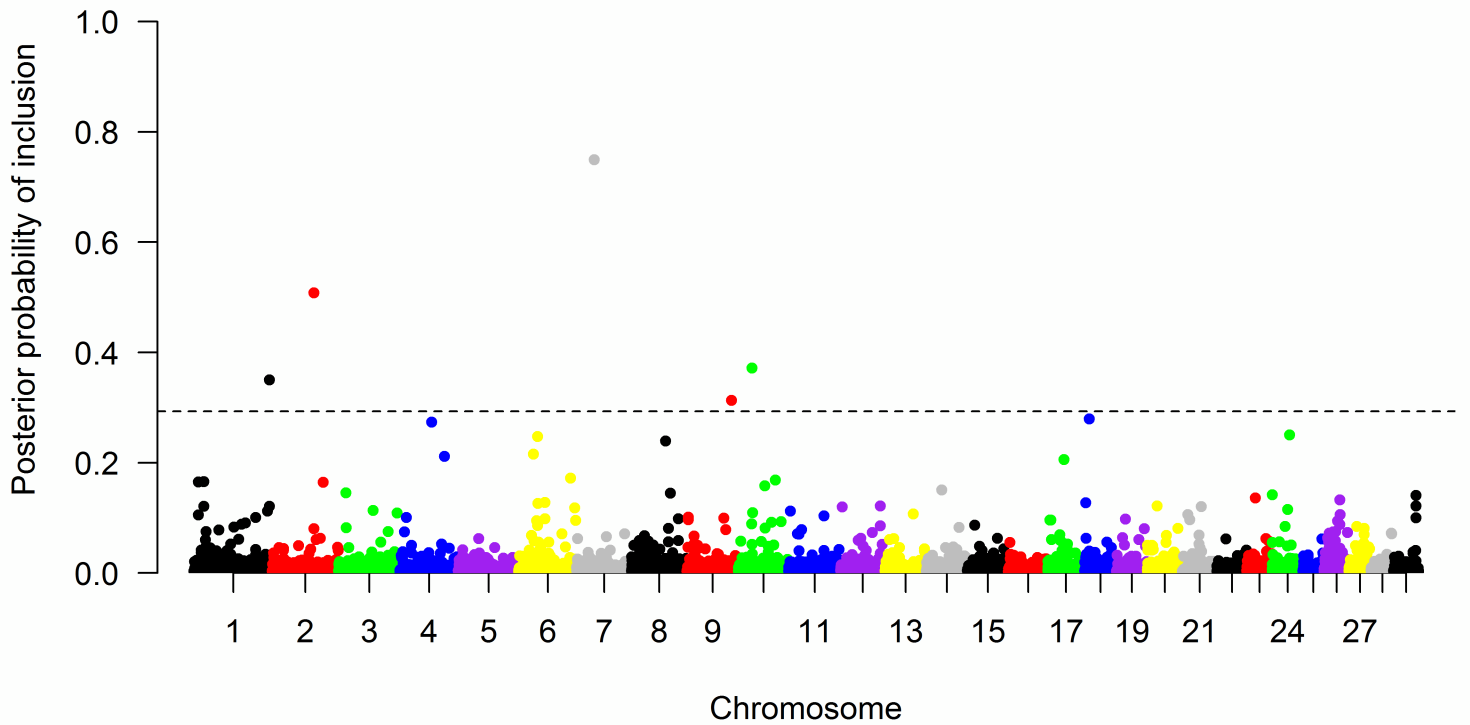



### 6t,8t-18:2 in LL

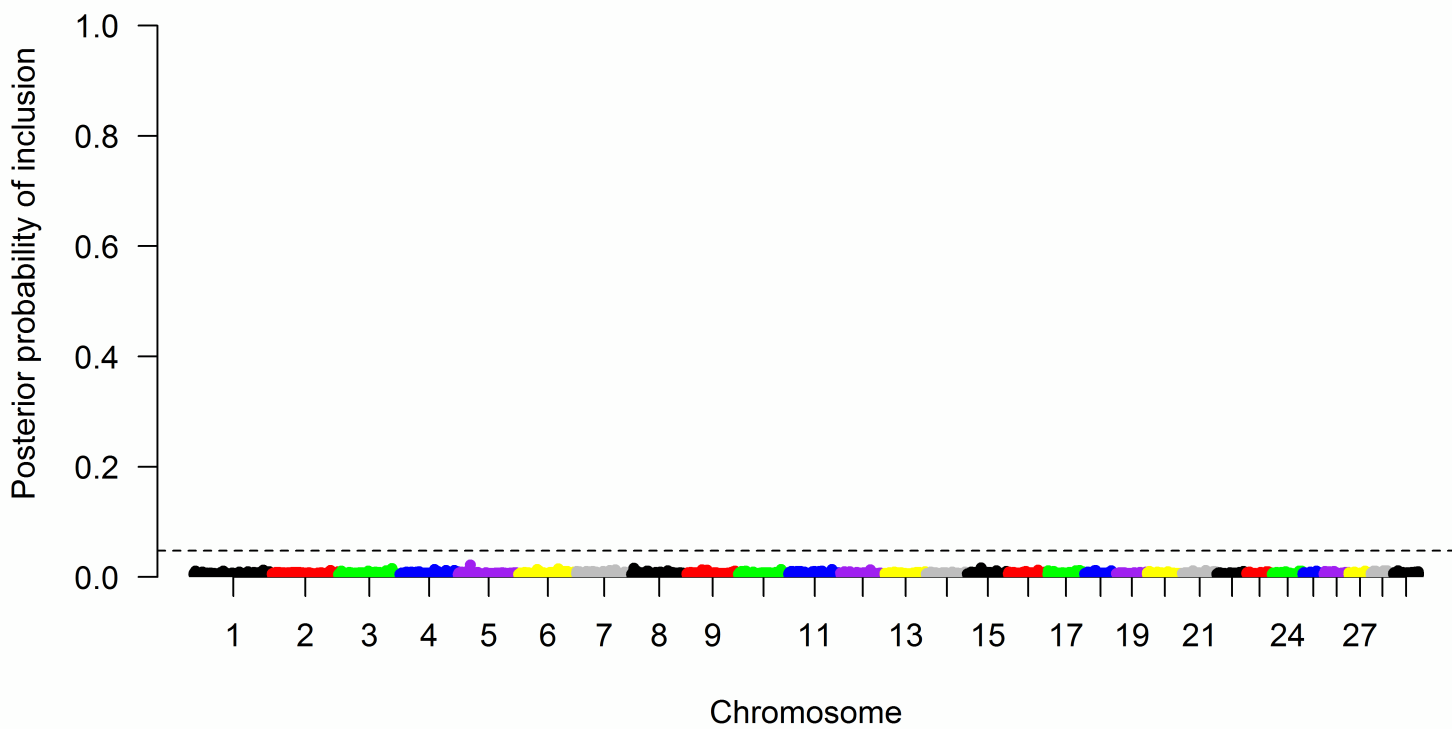

### 6t,8t-18:2 in SQ

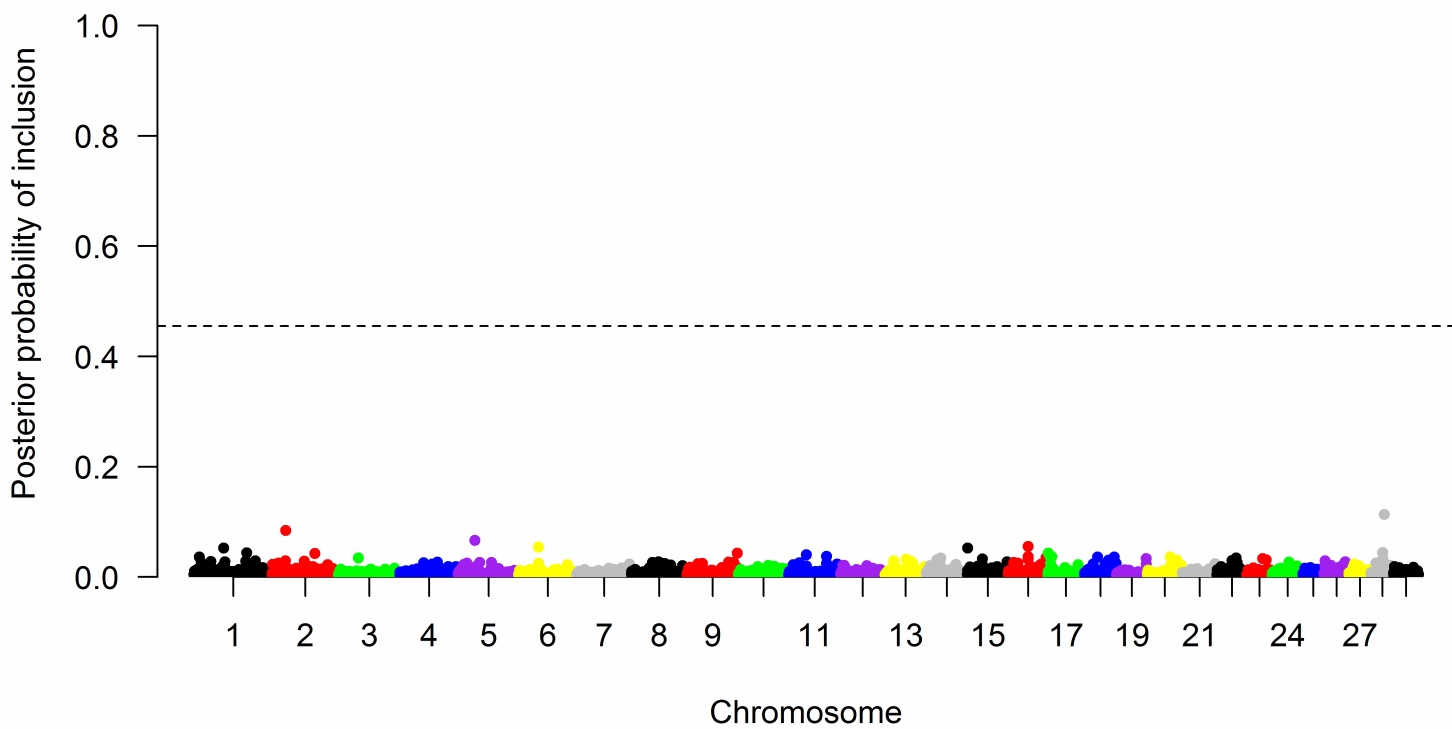

### 7t,9c-18:2 in LL

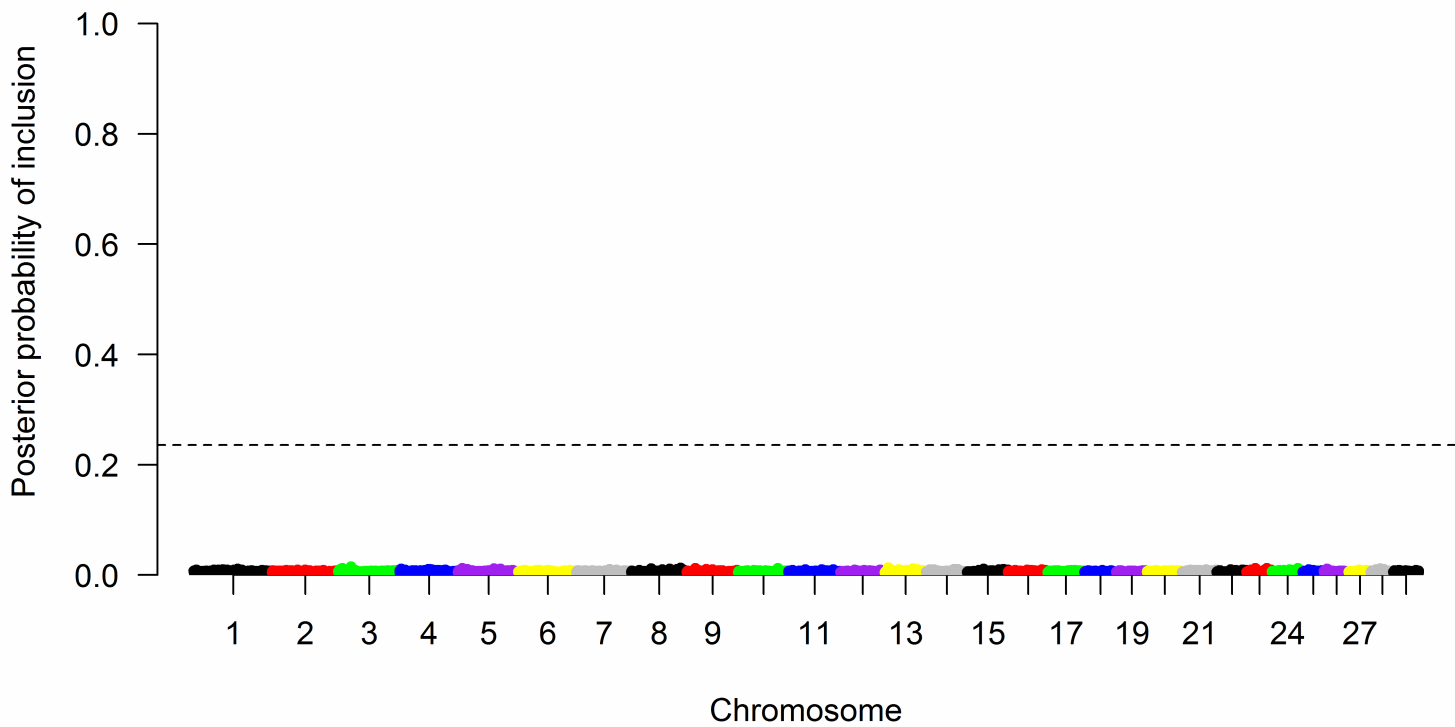

### 7t,9c-18:2 in SQ

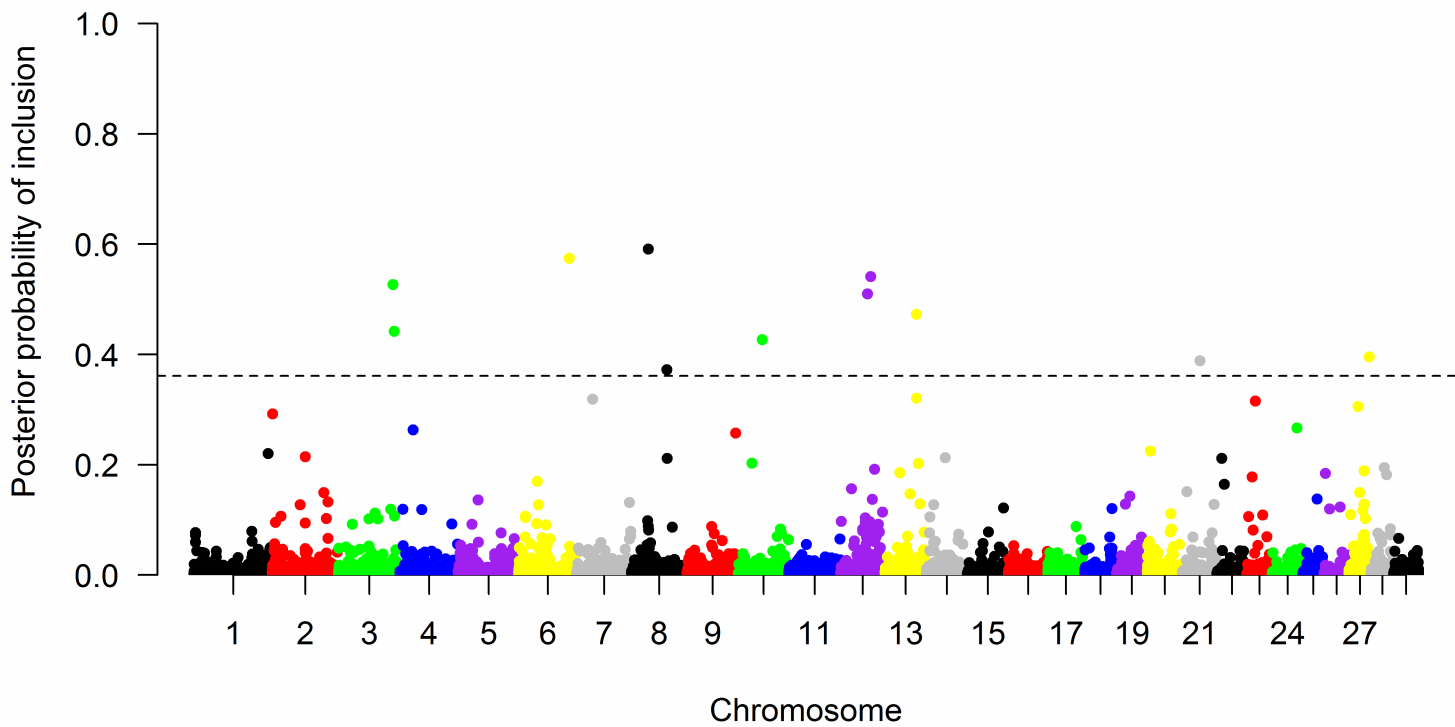

### 12t,14t-18:2 in LL

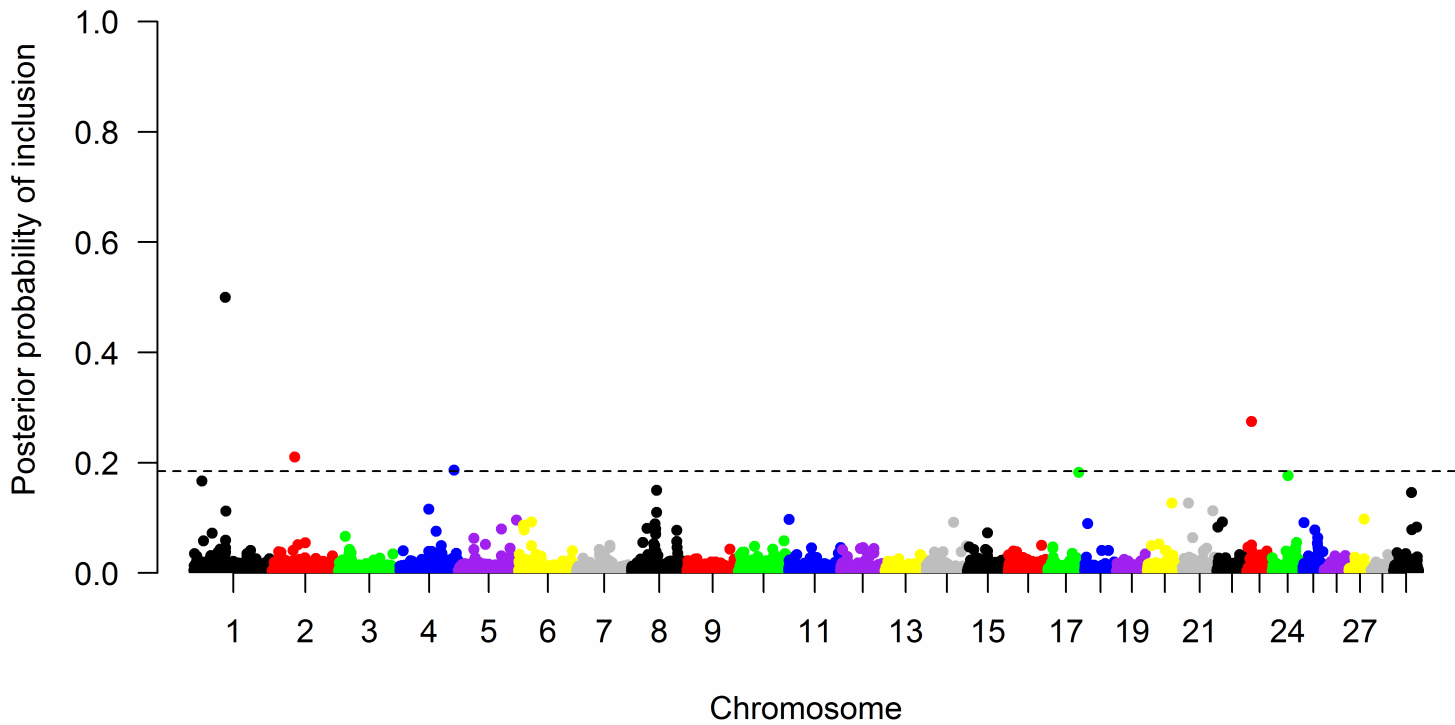

### 12t,14t-18:2 in SQ

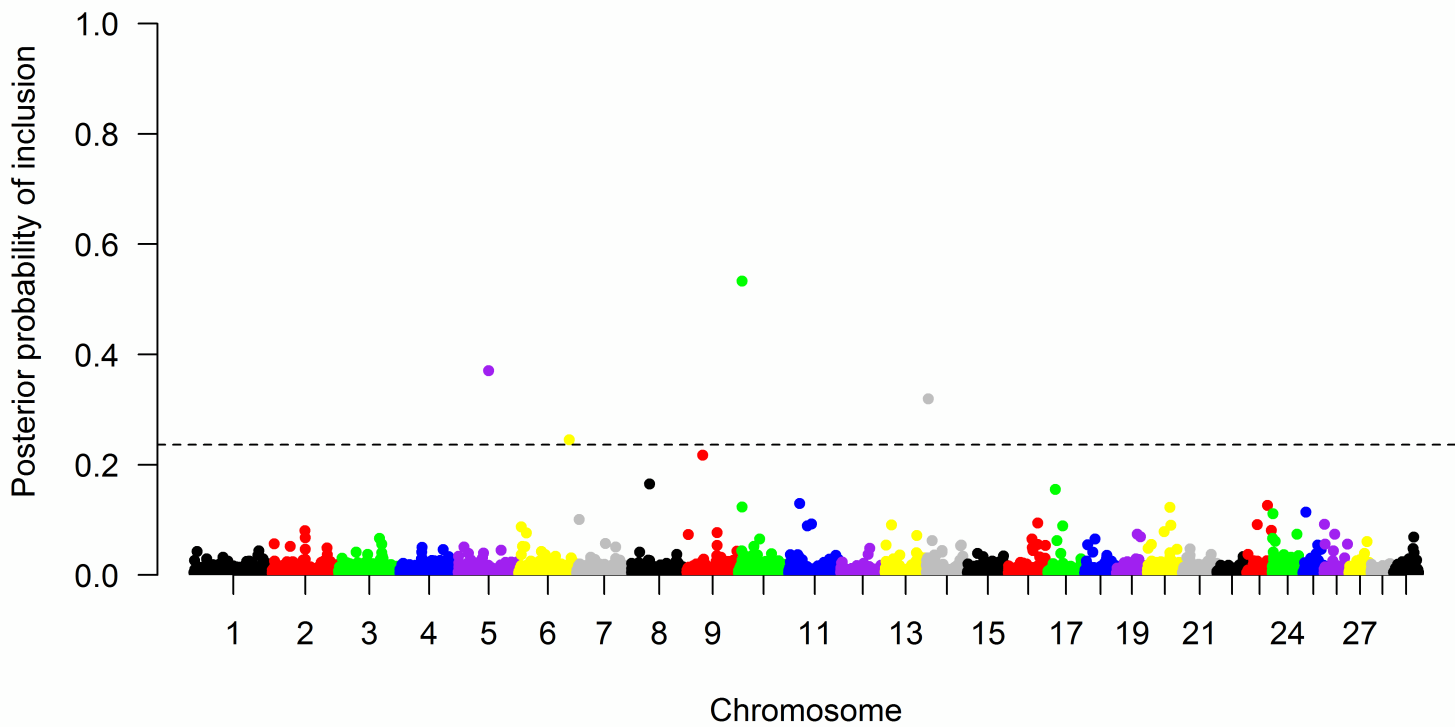

### 11t,13t-18:2 in LL

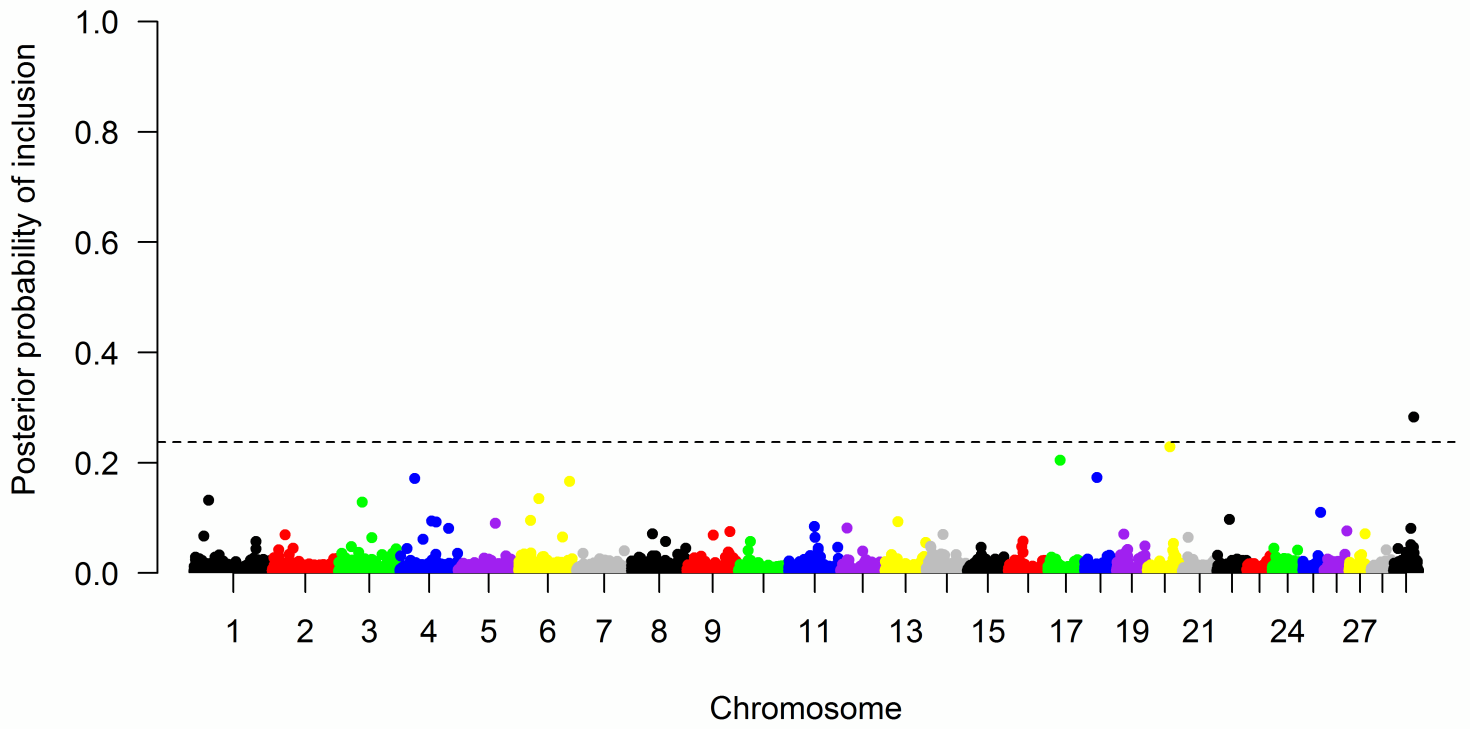

### 11t,13t-18:2 in SQ

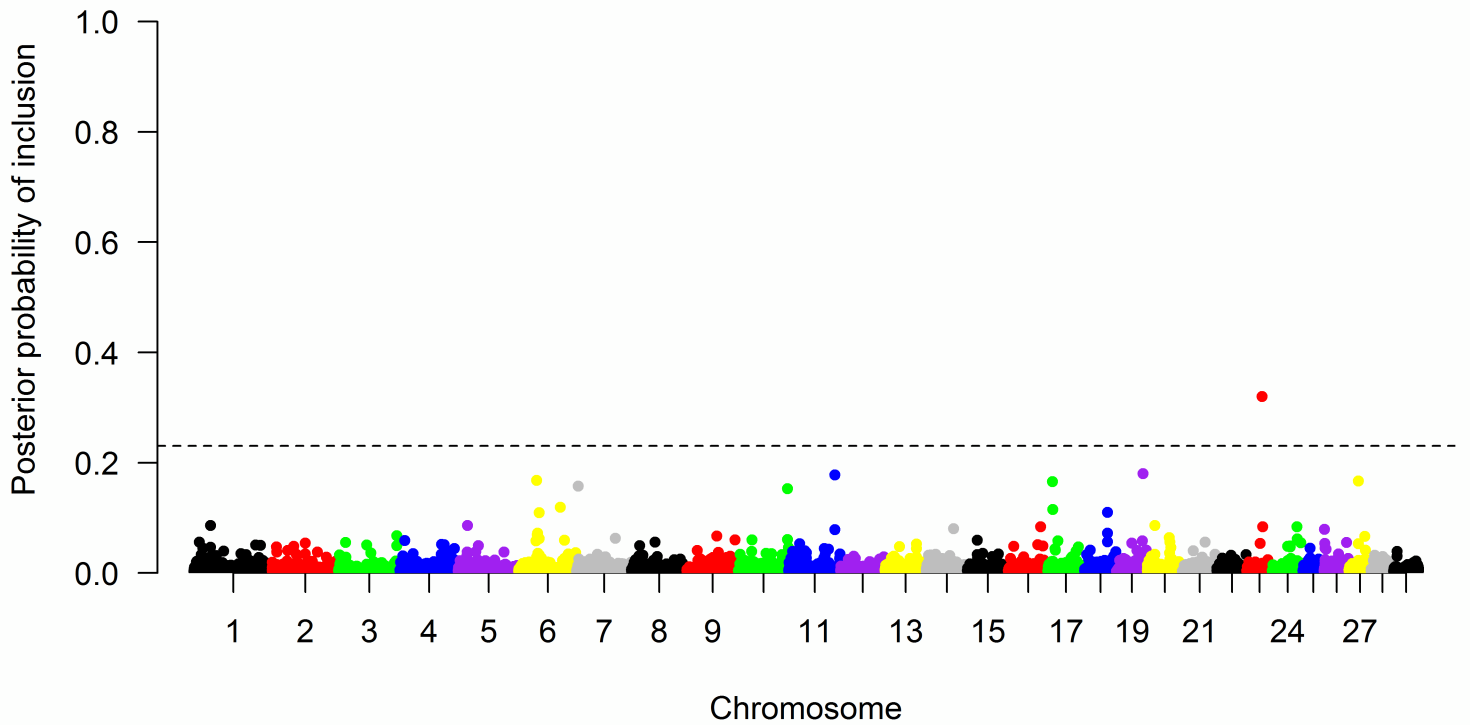



### 10t,12t-18:2 in LL

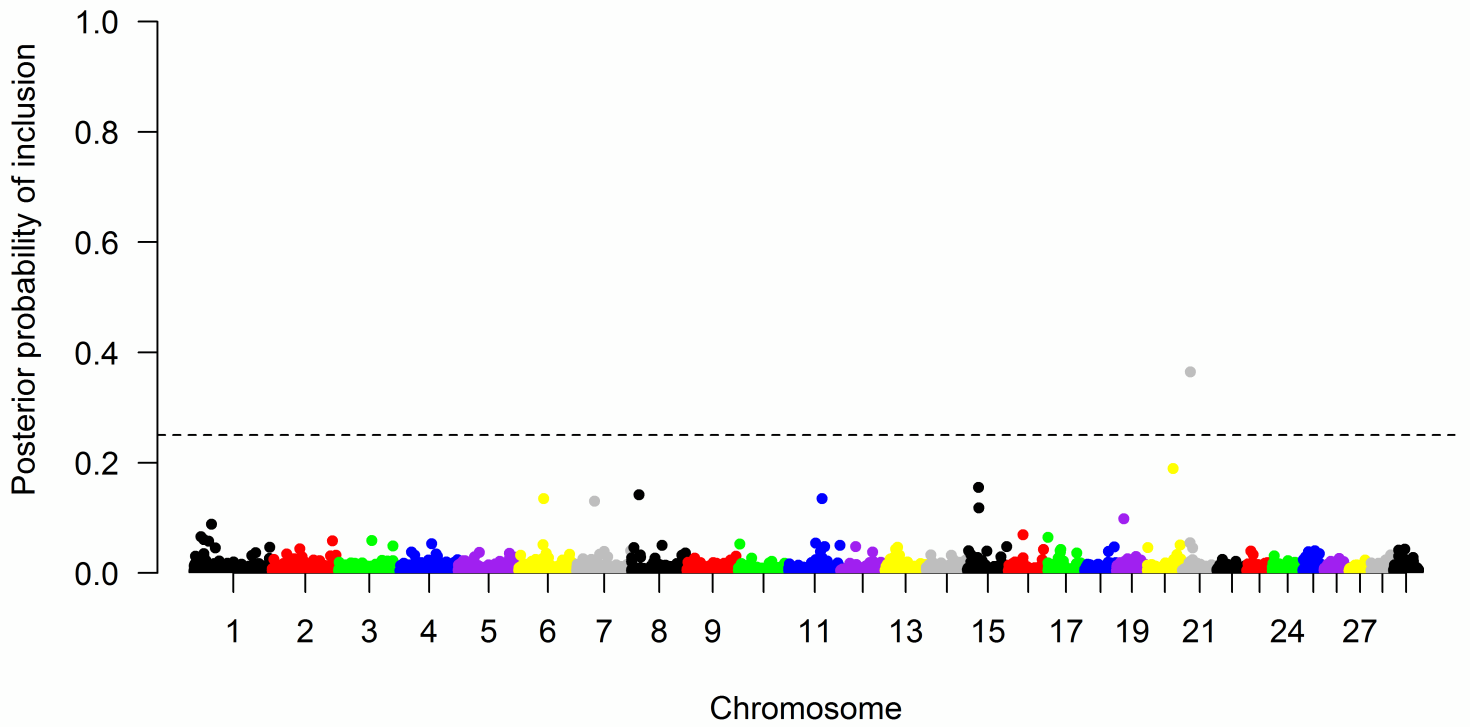

### 10t,12t-18:2 in SQ

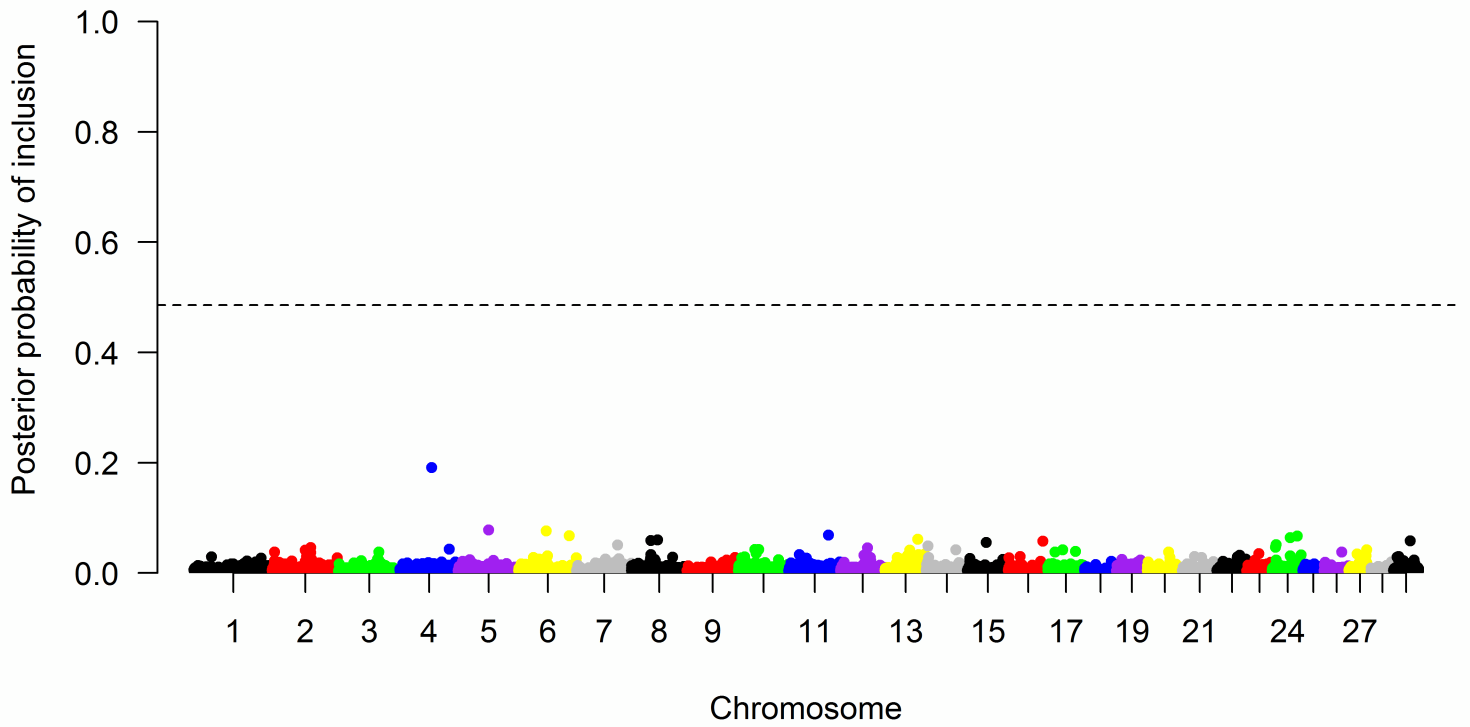

### 9t,11t-18:2 in LL

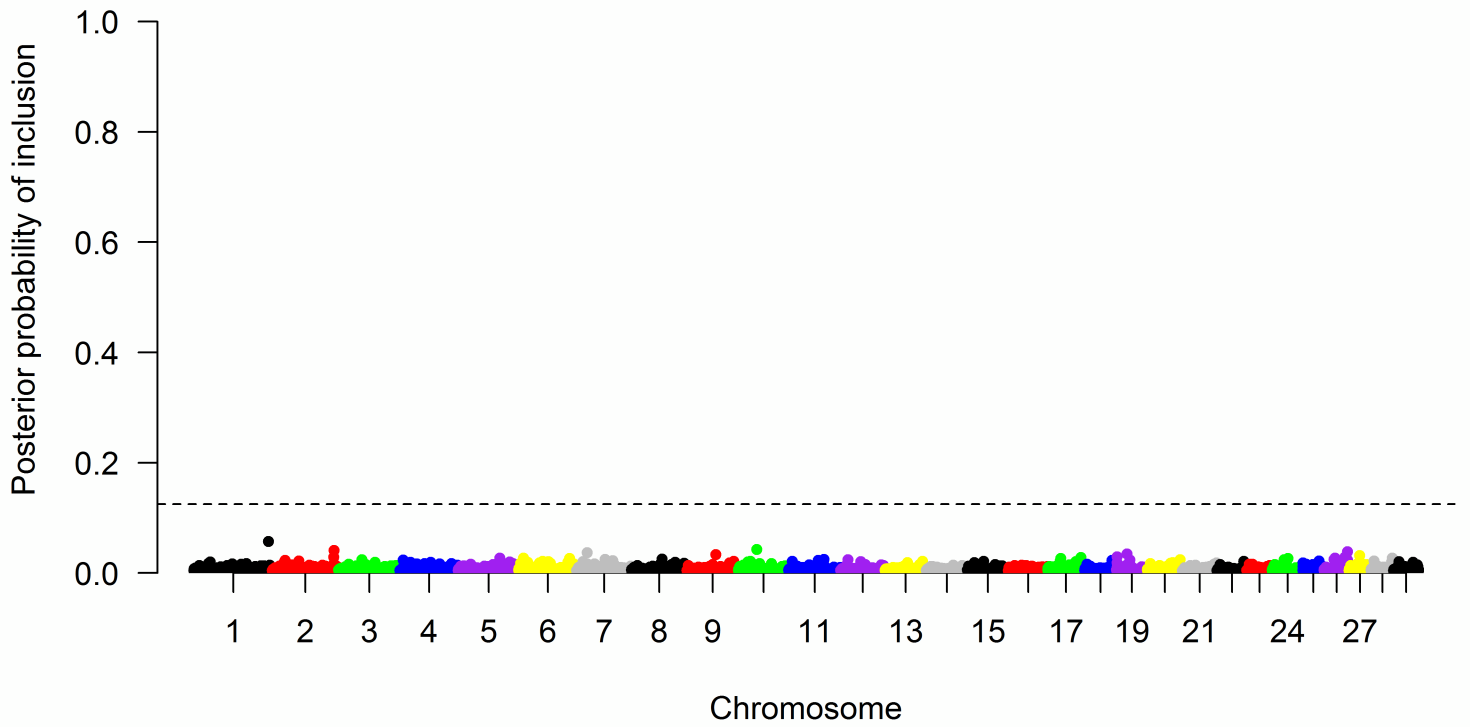

### 9t,11t-18:2 in SQ

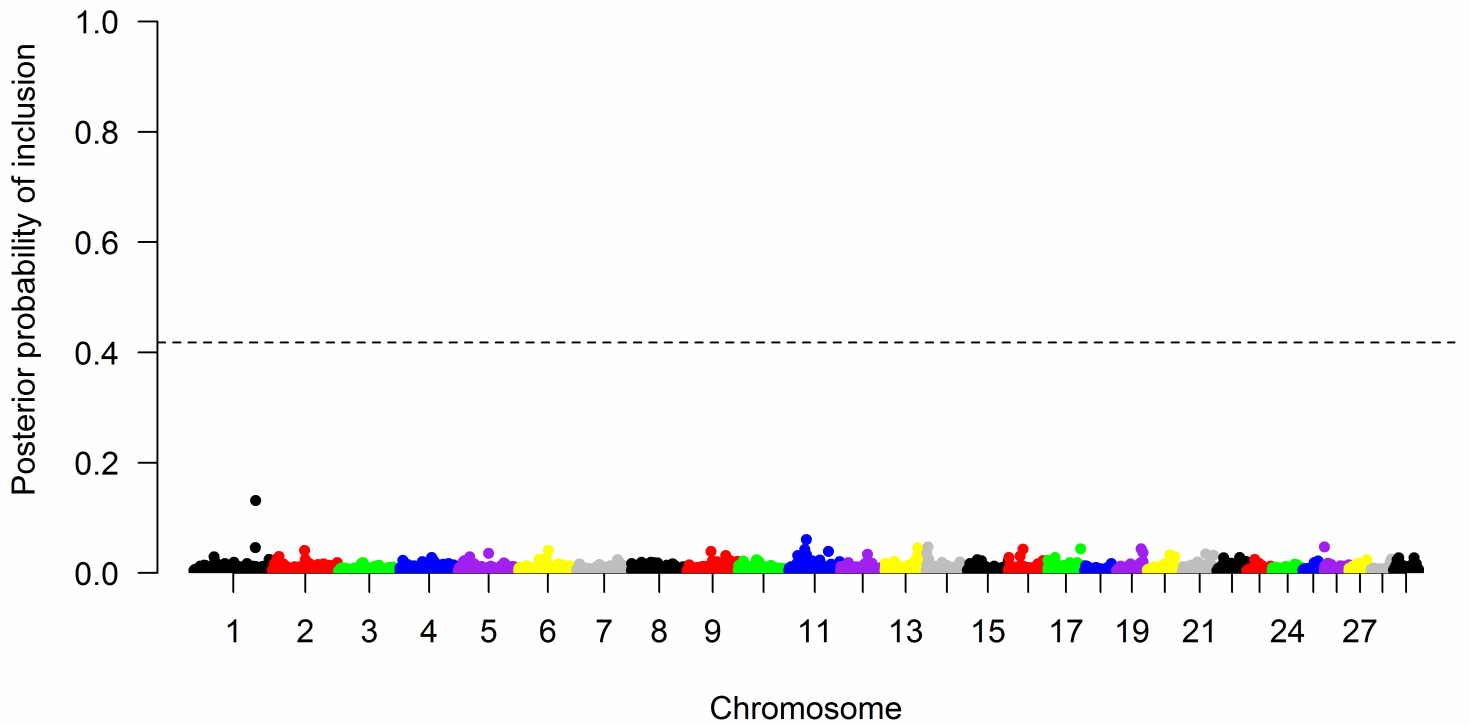

### 8t,10t-18:2 in LL

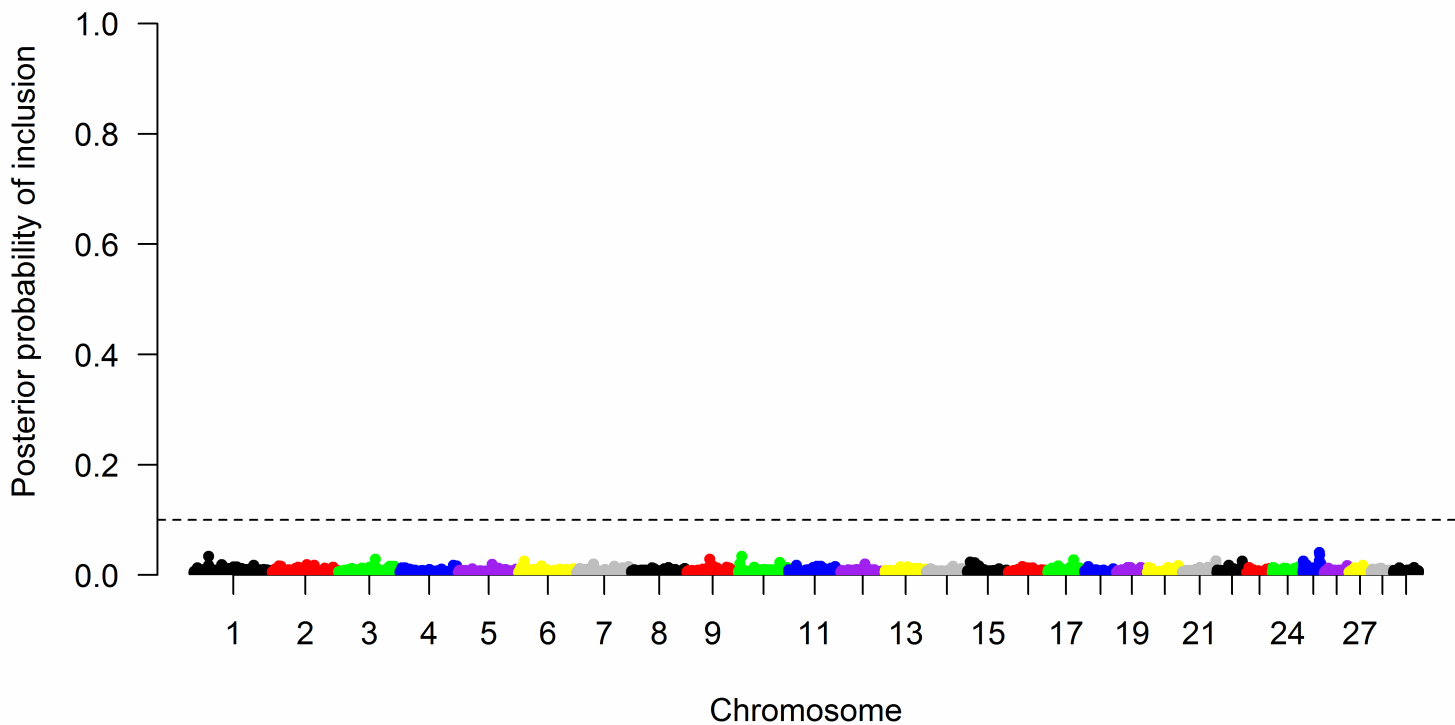

### 8t,10t-18:2 in SQ

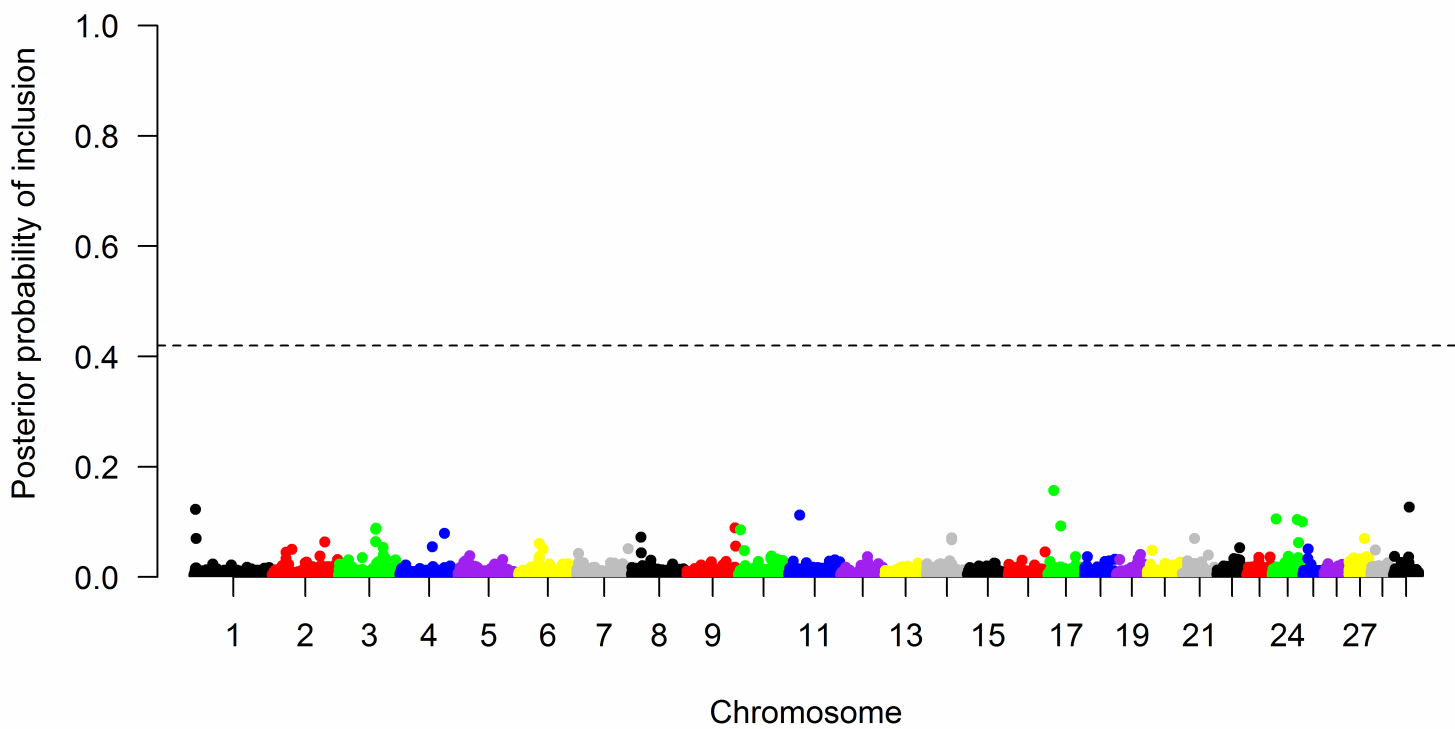

### 7t,9t-18:2 in LL

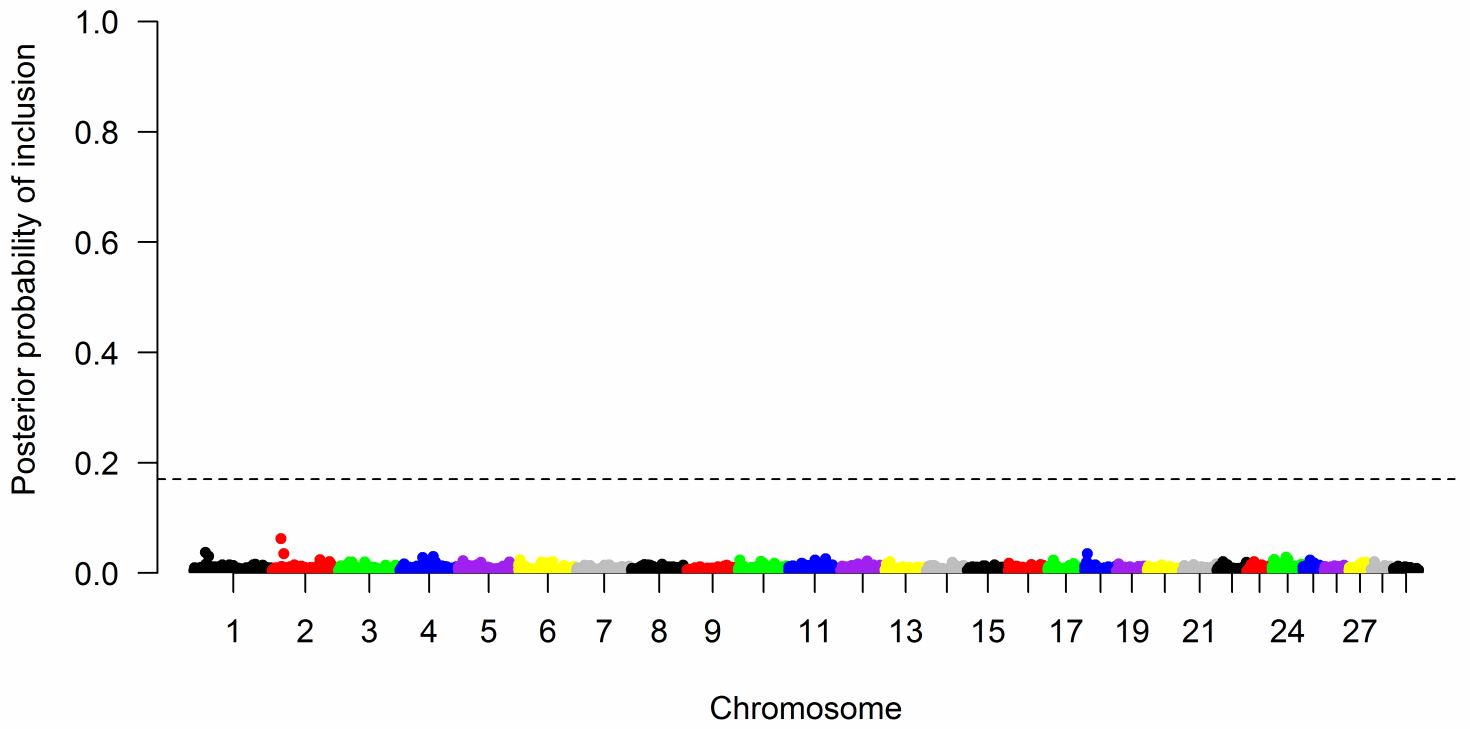

### 7t,9t-18:2 in SQ

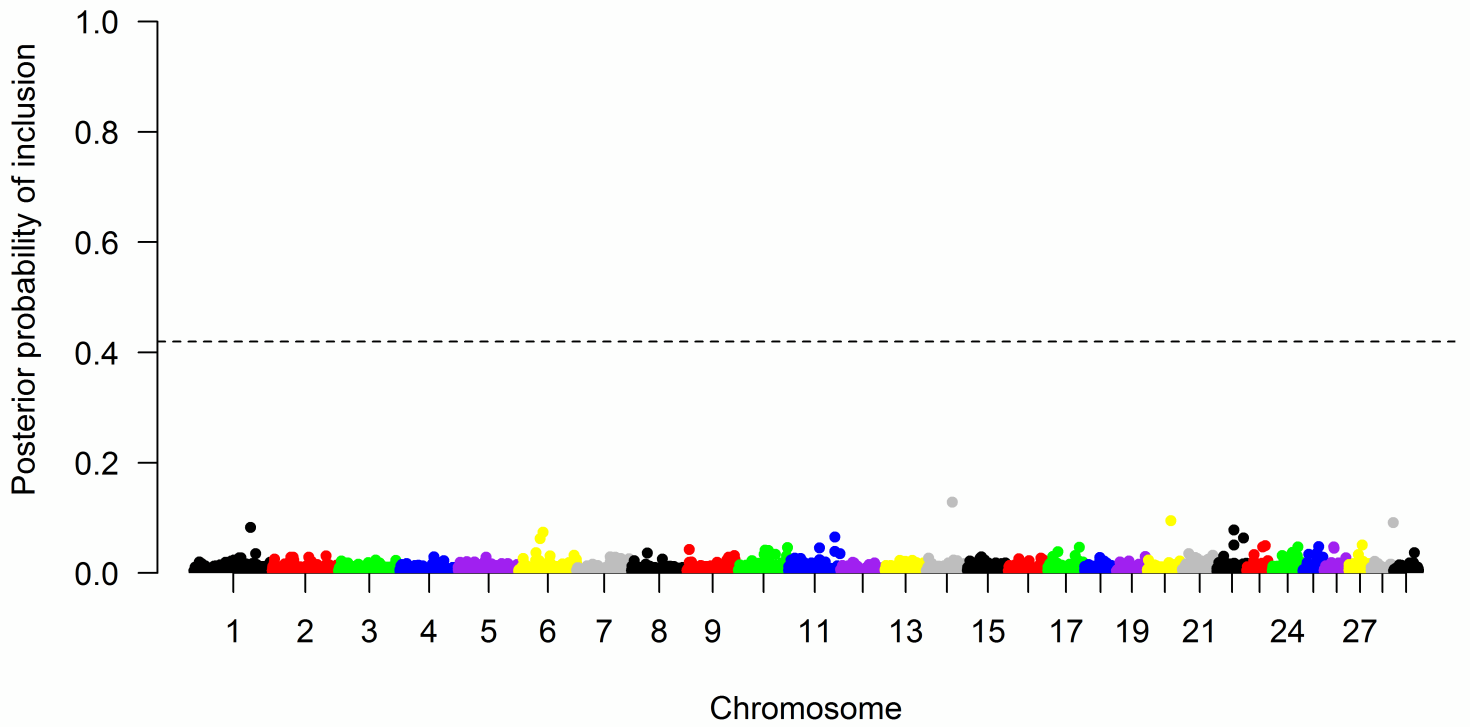

### 12t,14c/12c,14t-18:2 in LL

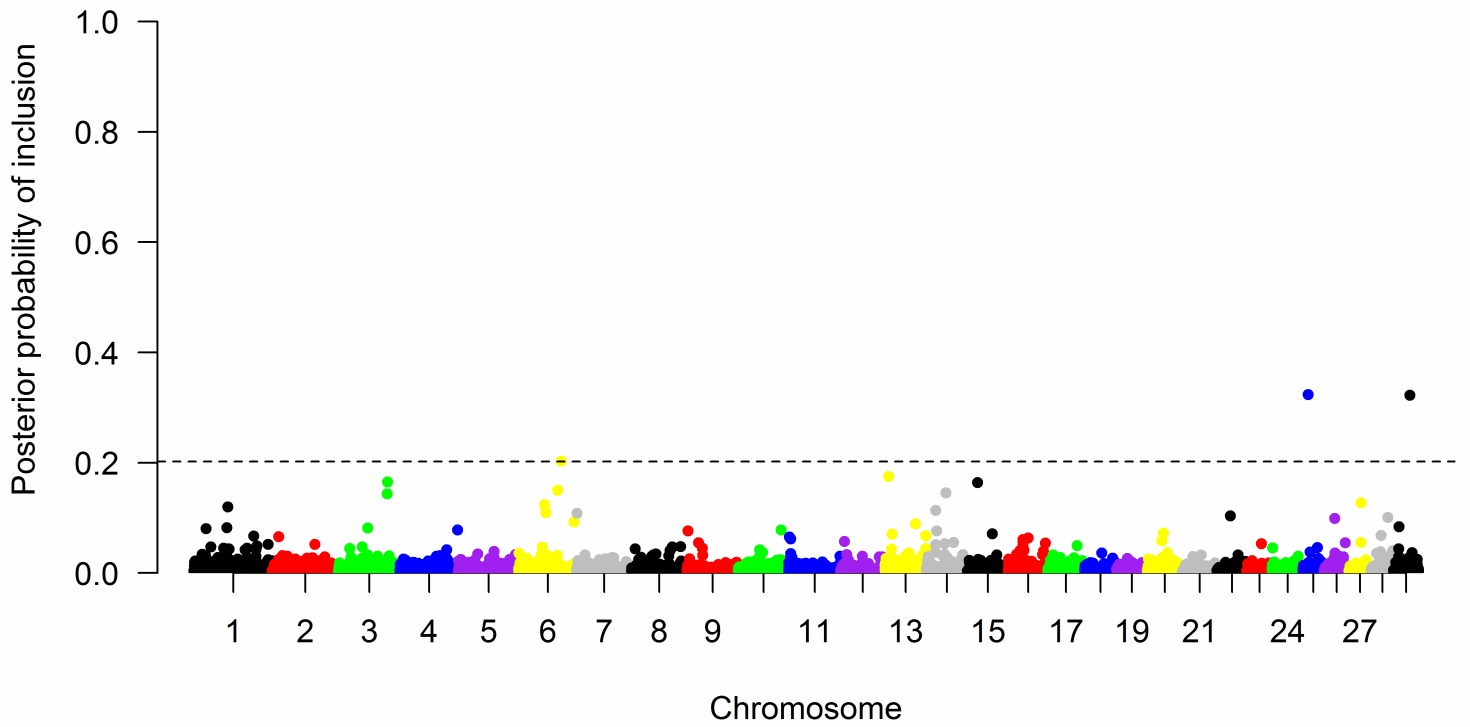

### 12t,14c/12c,14t-18:2 in SQ

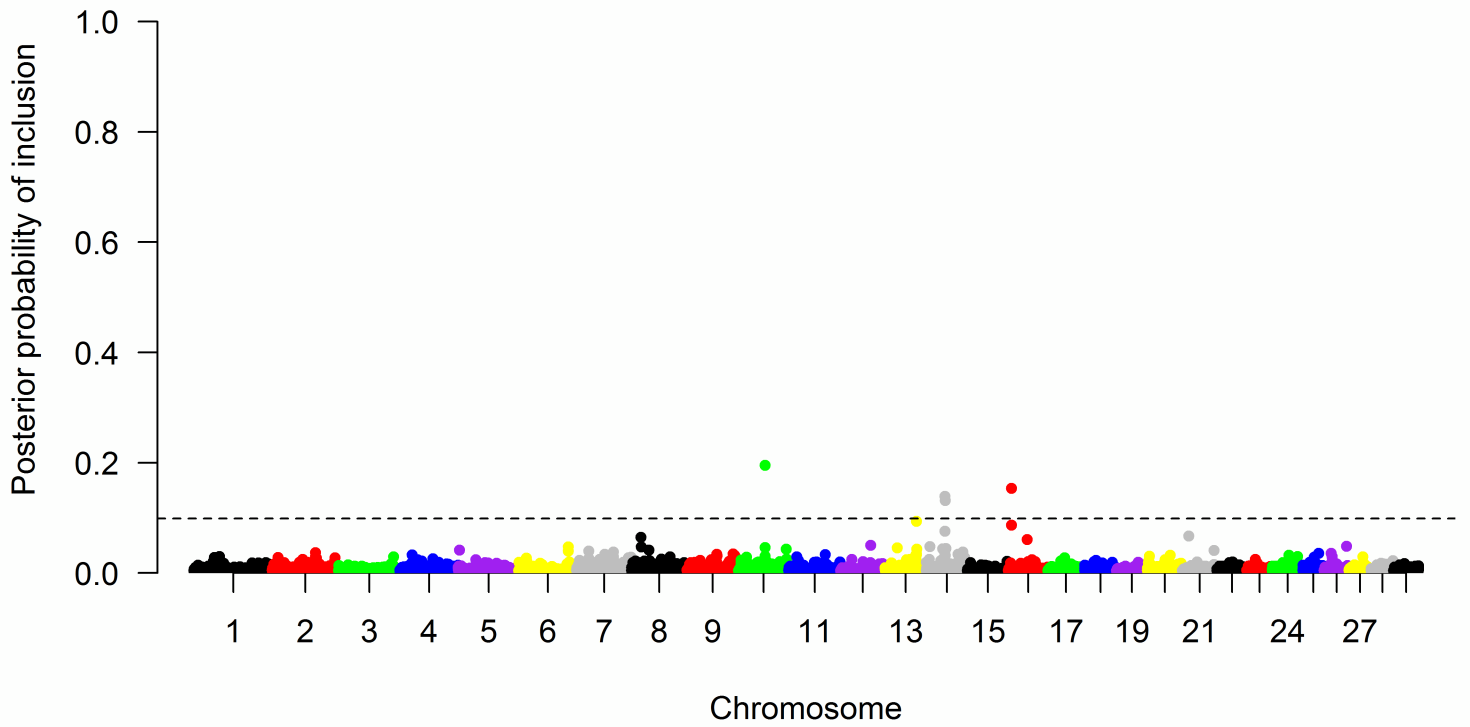

### 11t,13c/11c,13t-18:2 in LL

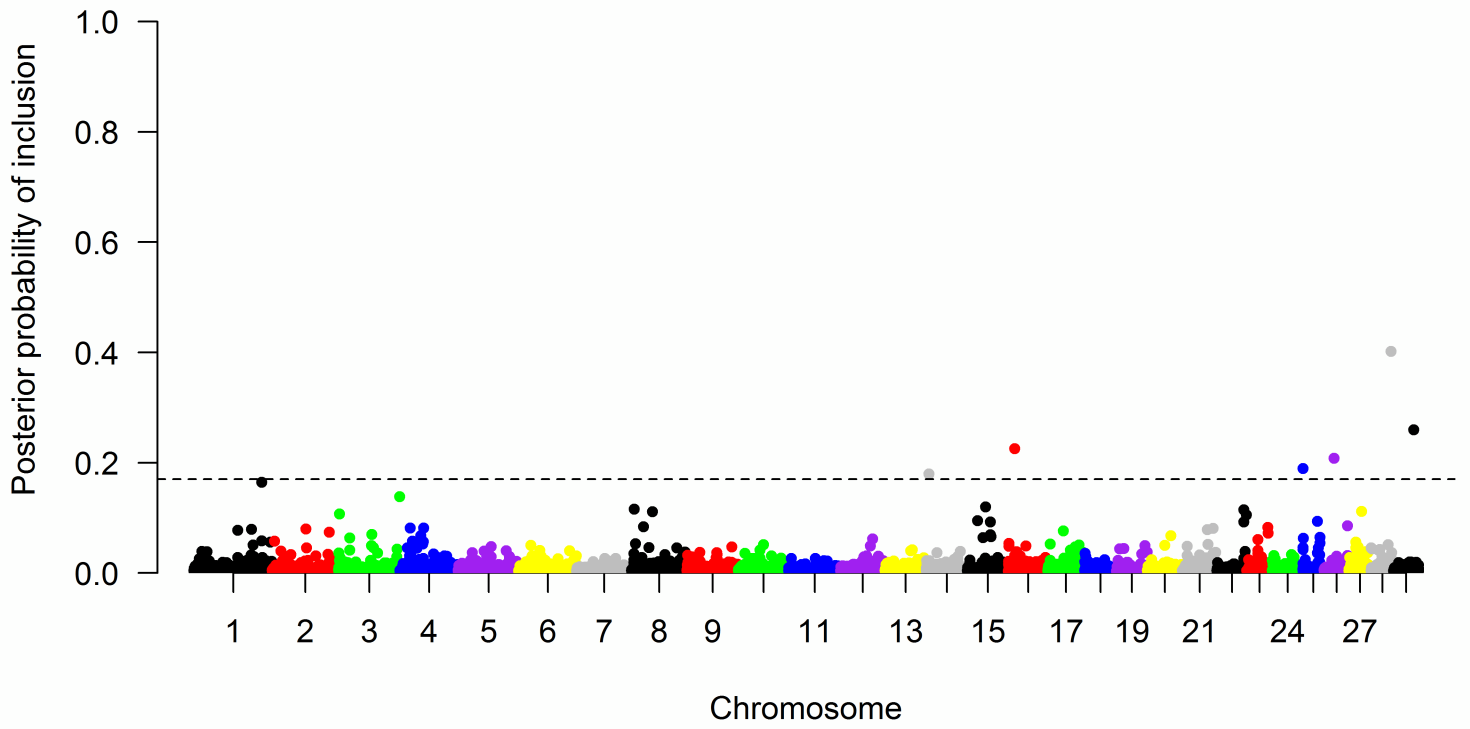

### 11t,13c/11c,13t-18:2 in SQ

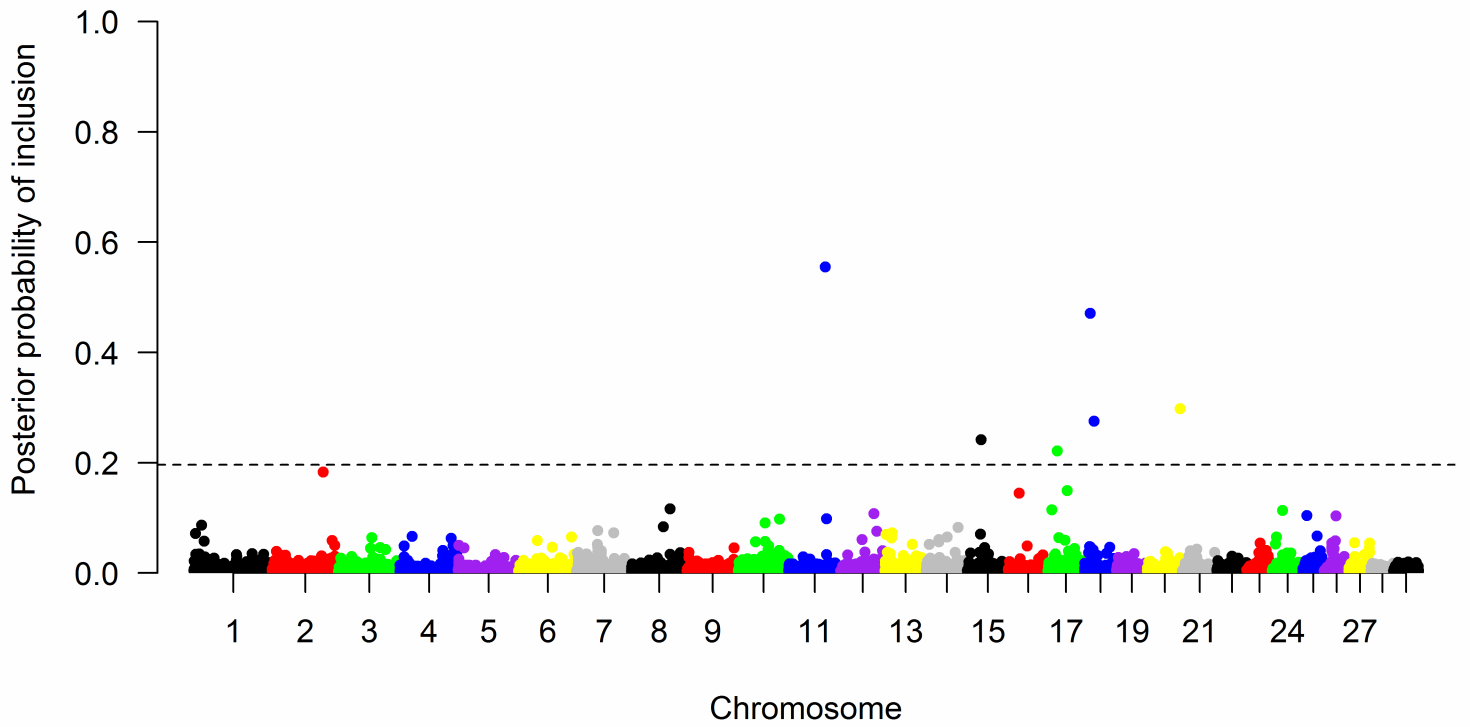

### 10t,12c-18:2 in LL

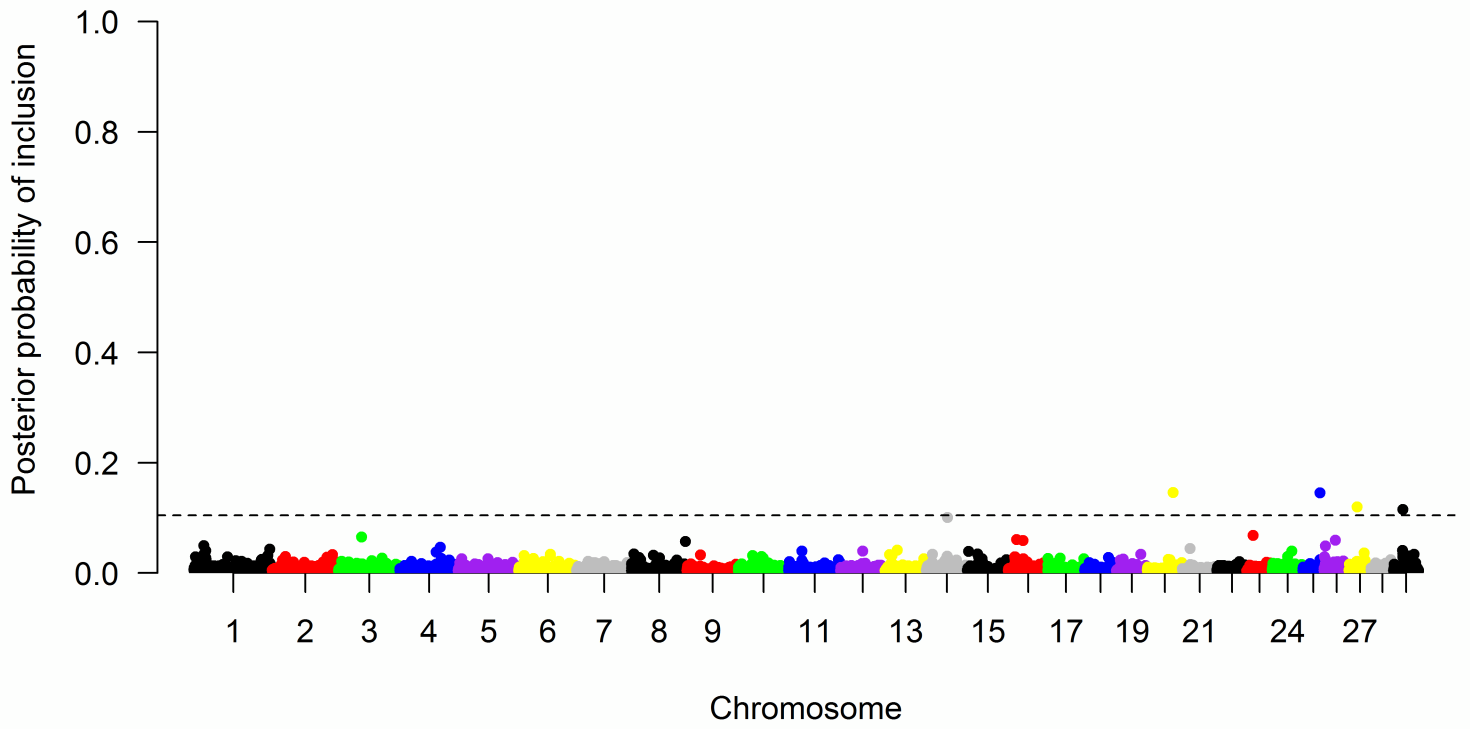

### 10t,12c-18:2 in SQ

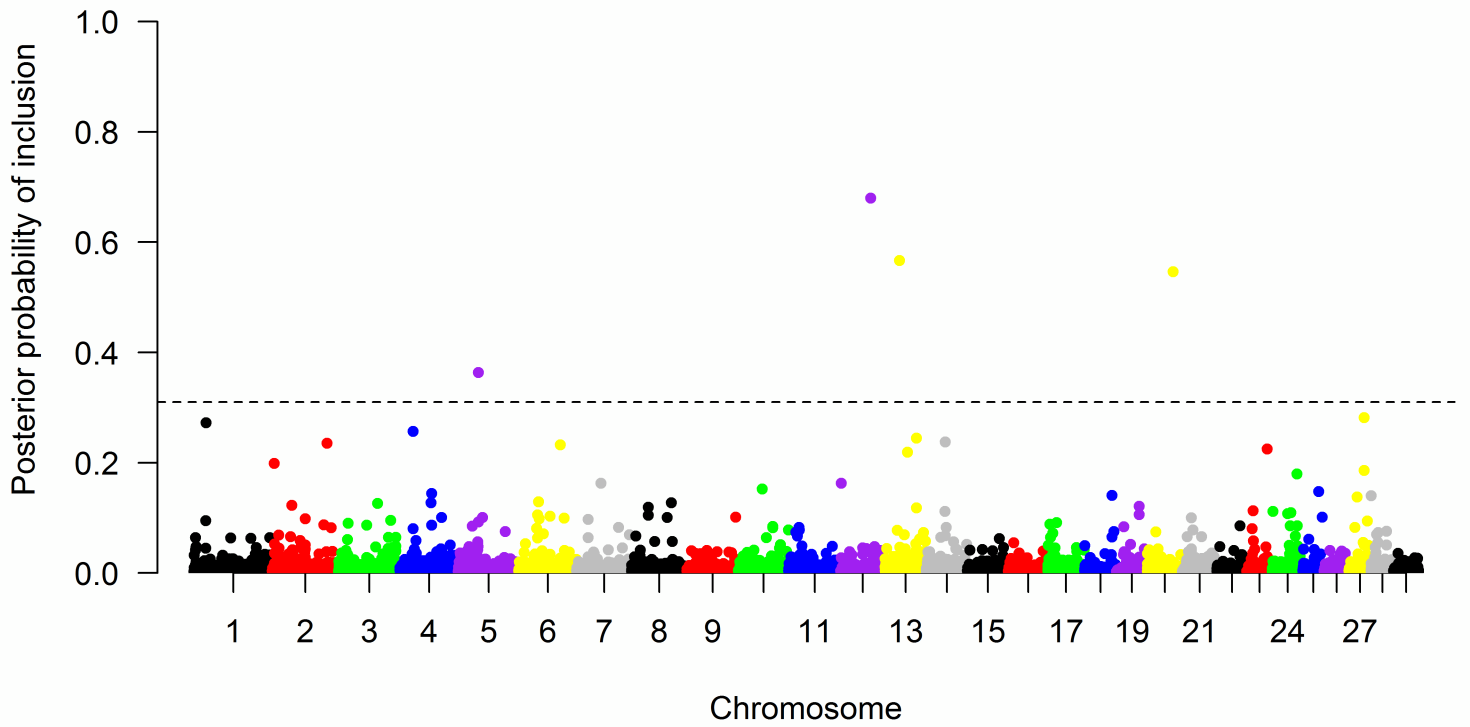

### 8t,10c-18:2 in LL

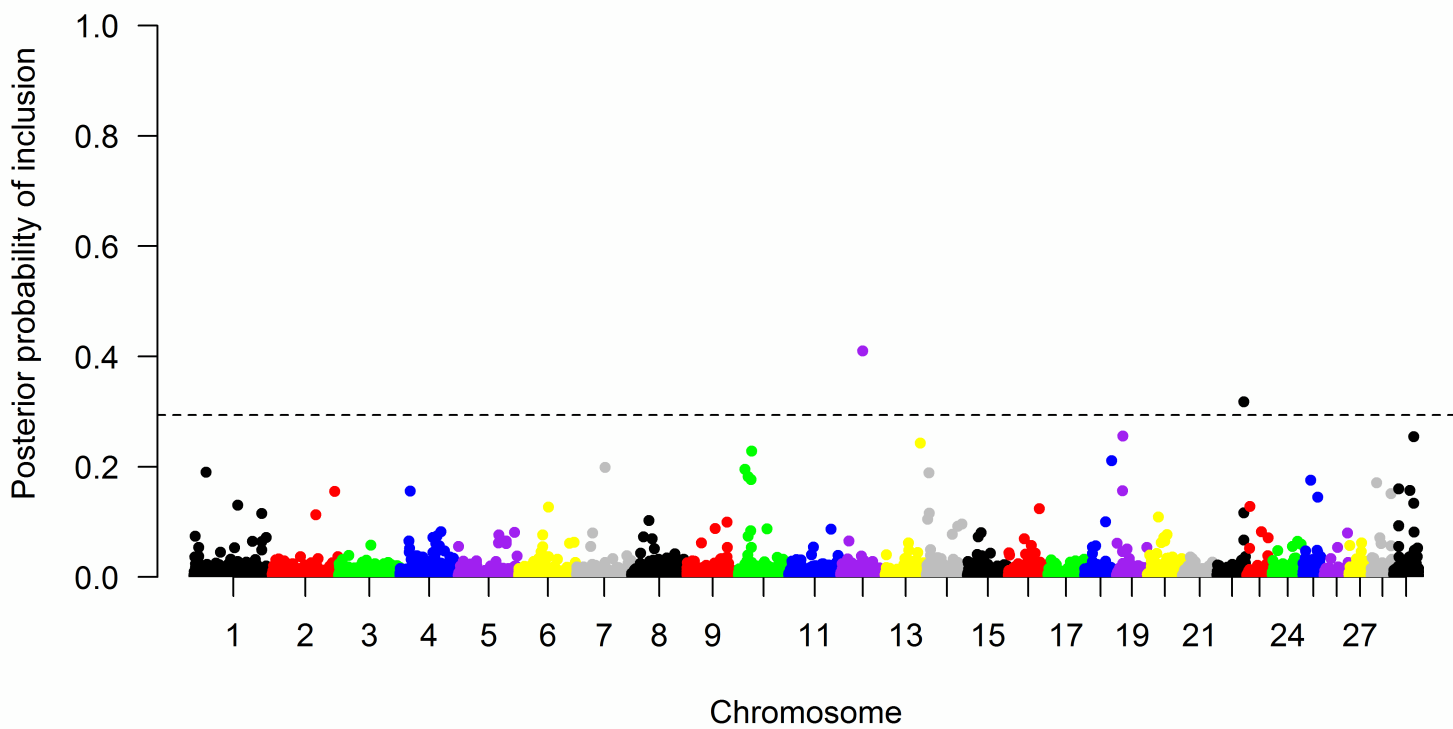



### TotalCLA in LL

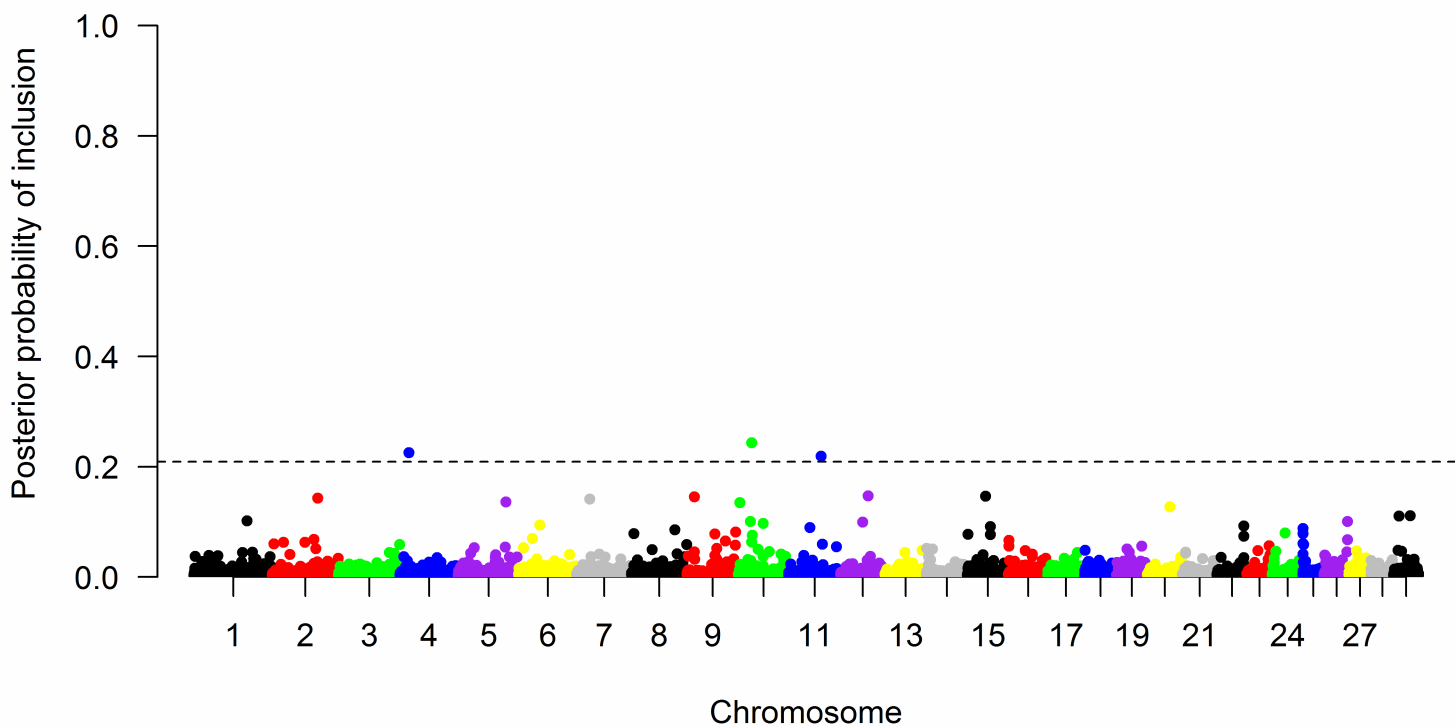

### TotalCLA in SQ

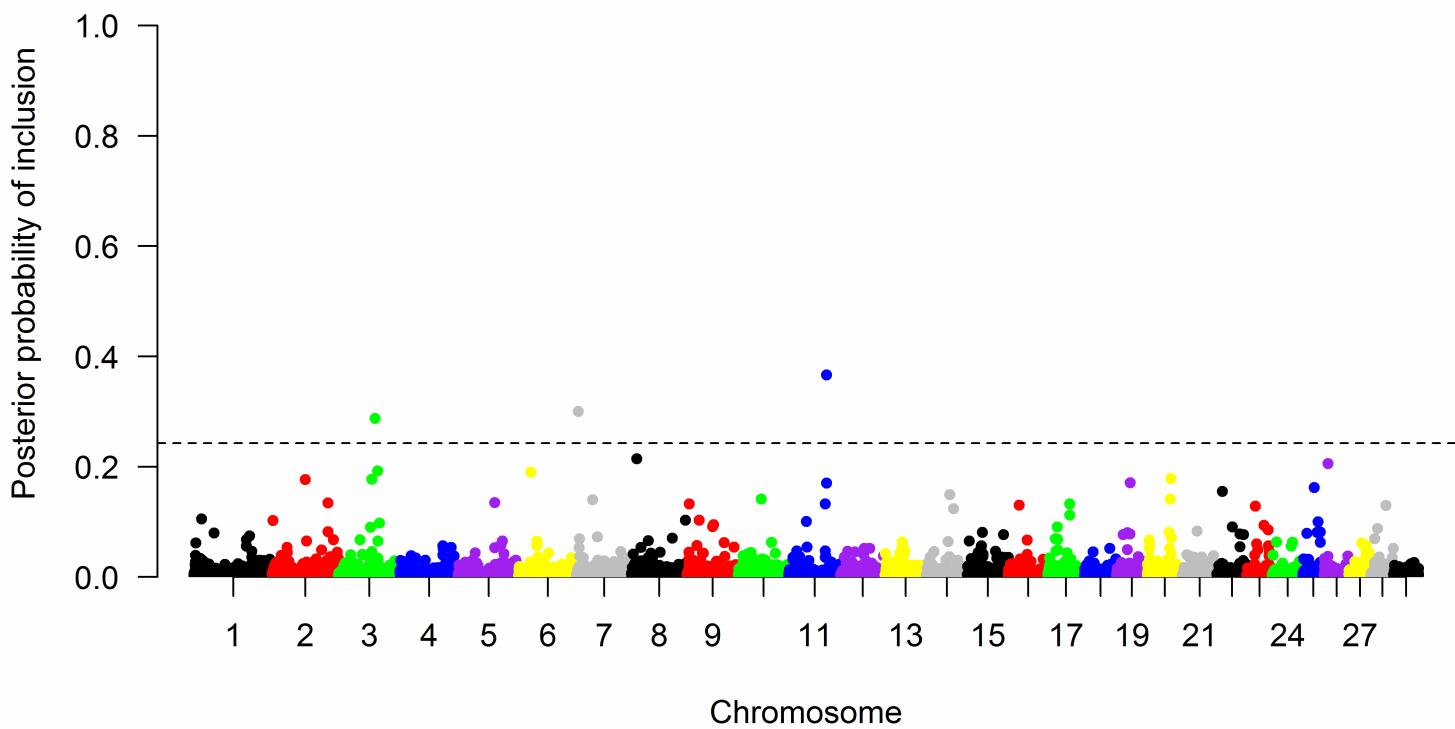

### 18:2n-6 in LL

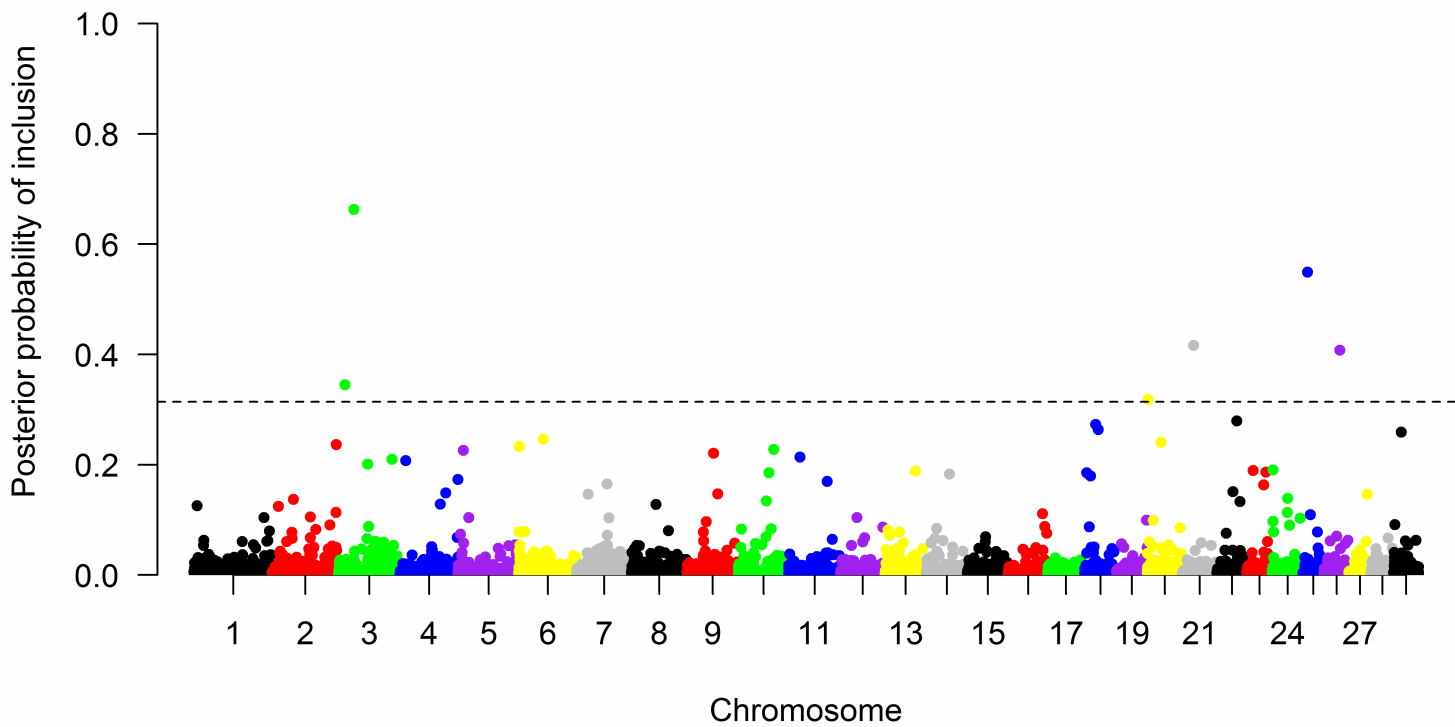

### 18:2n-6 in SQ

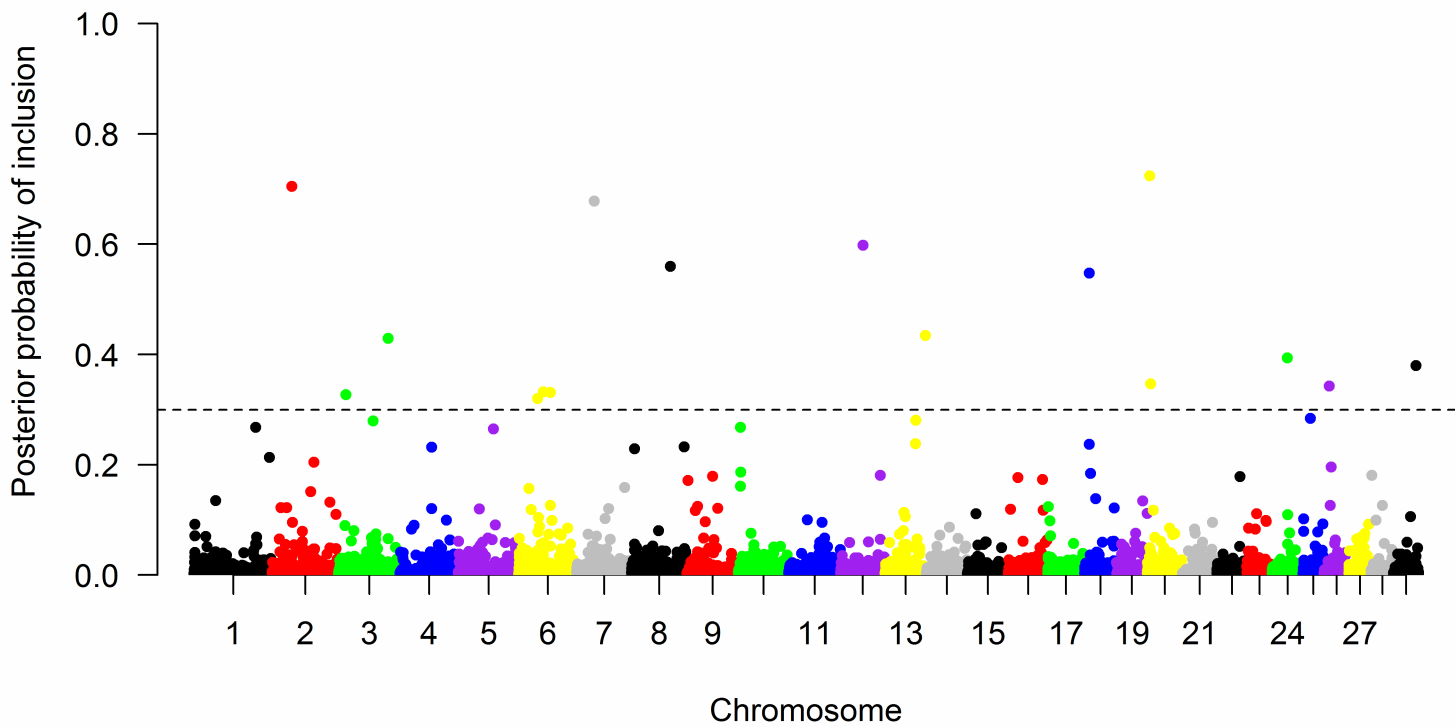

### 18:3n-3 in LL

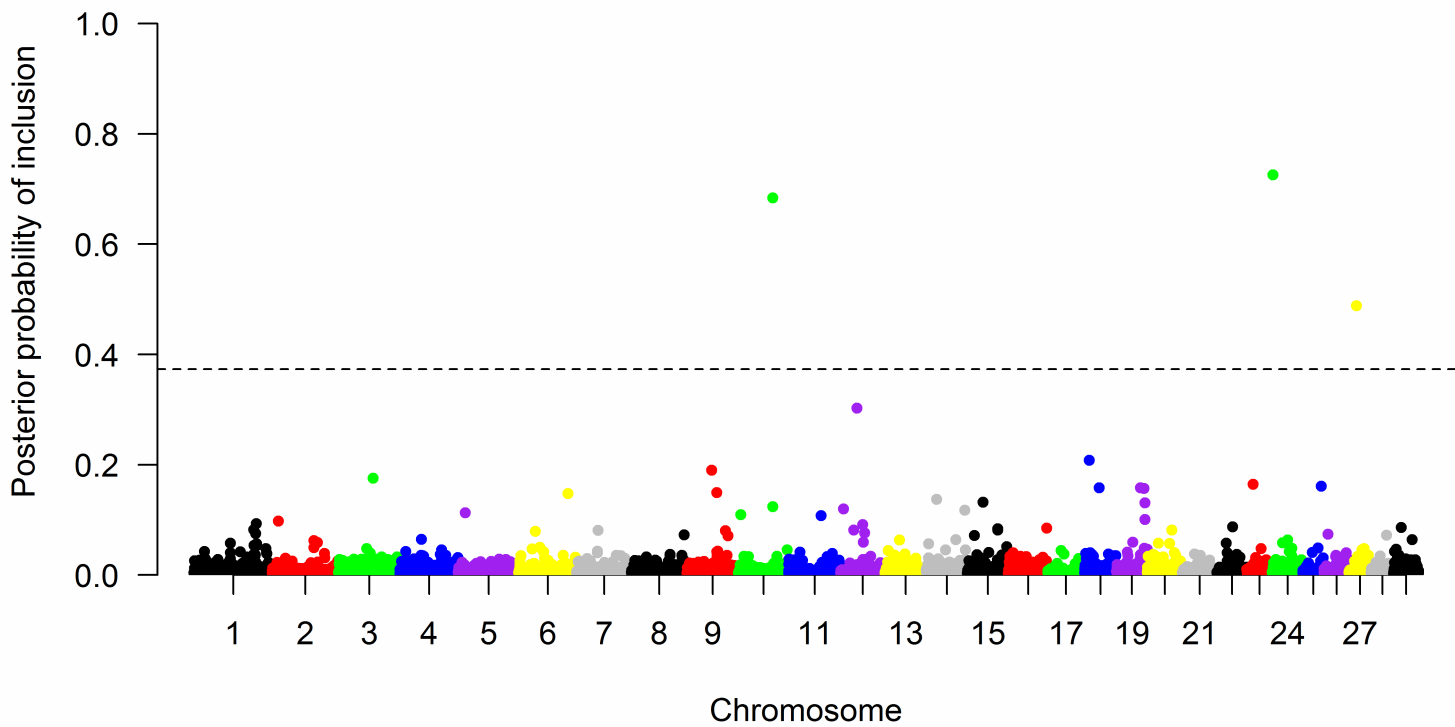

### 18:3n-3 in SQ

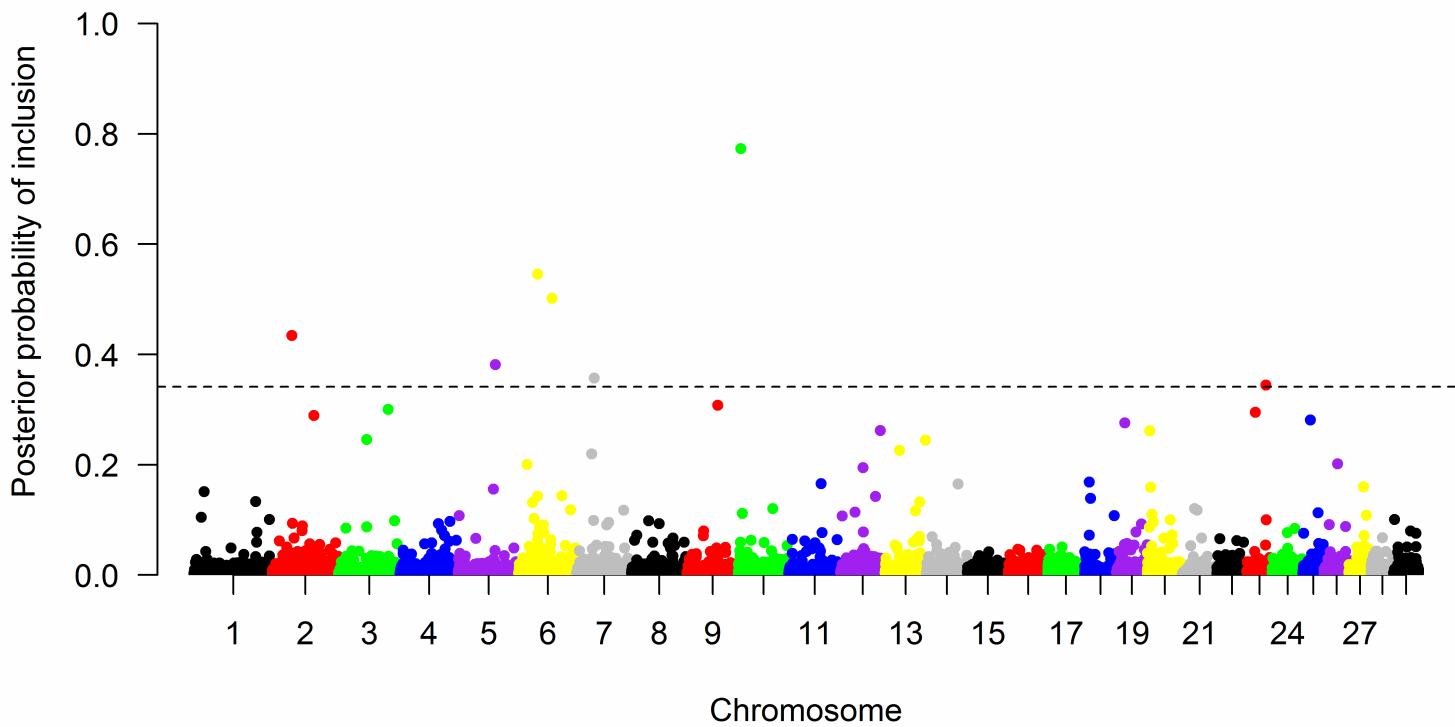

### 18:3n-6 in LL

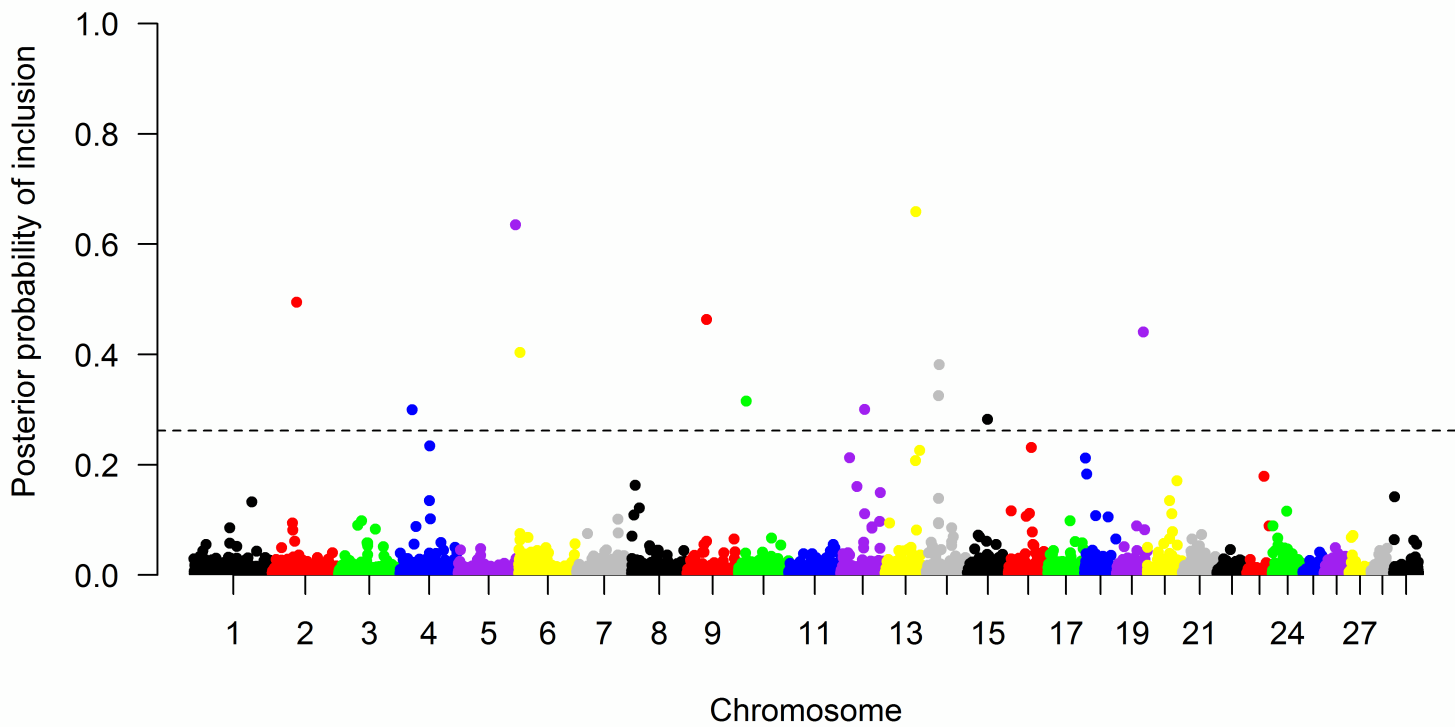

### 18:3n-6 in SQ

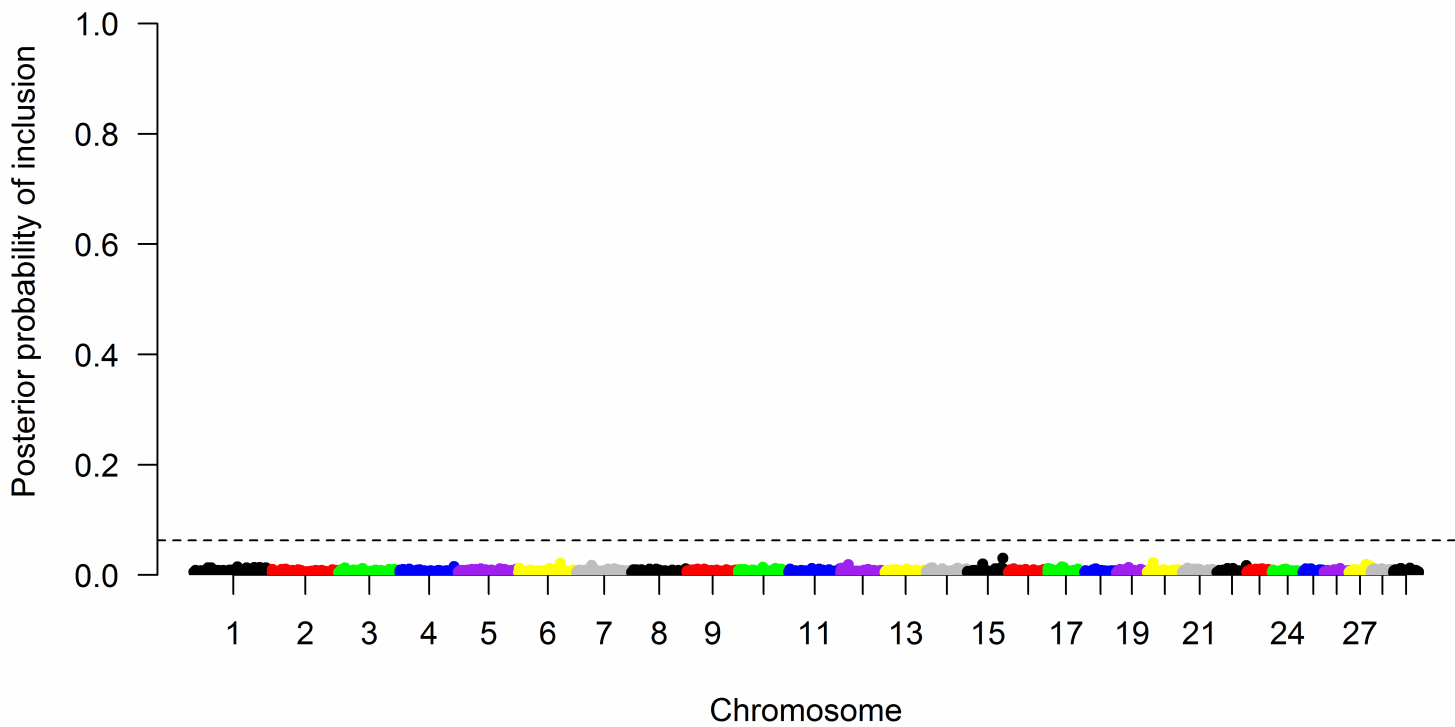

### 20:2n-6 in LL

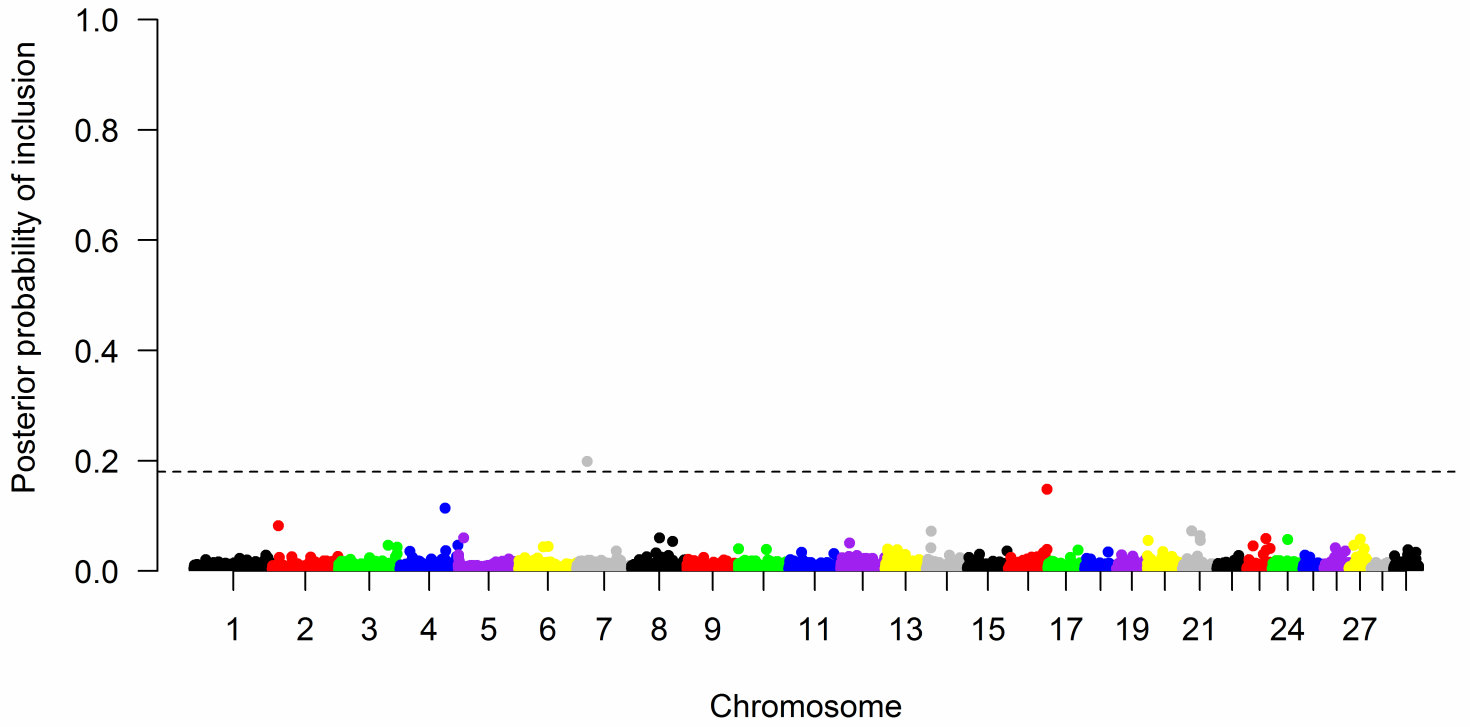

### 20:2n-6 in SQ

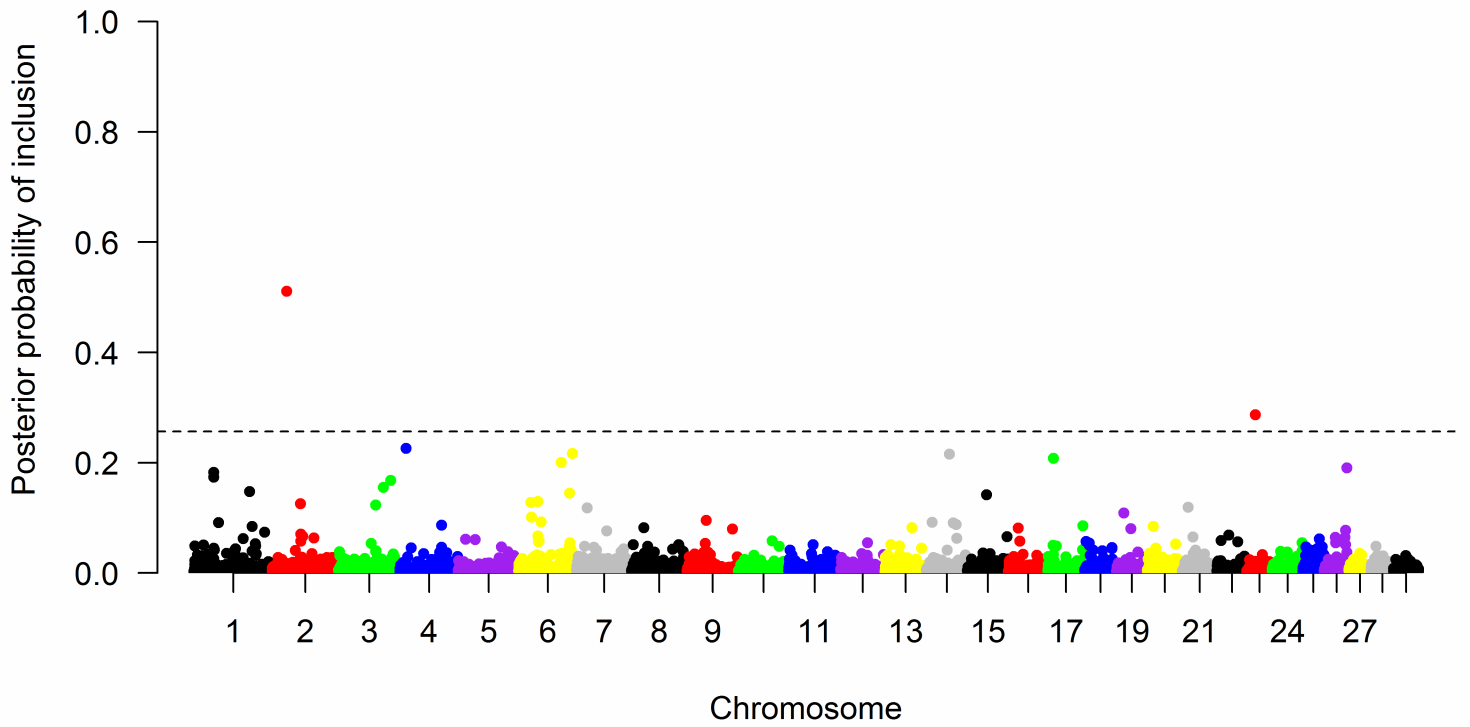

### 20:3n-6 in LL

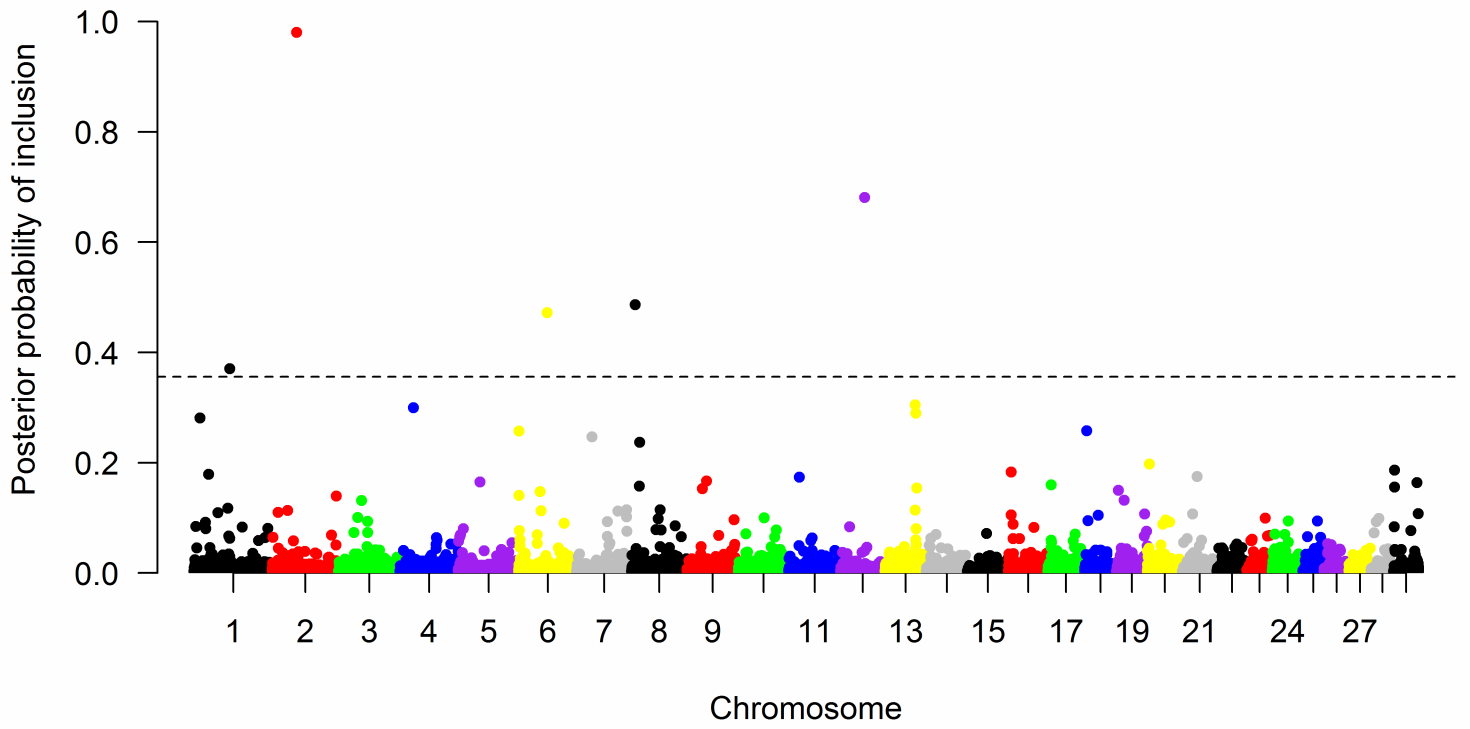

### 20:3n-6 in SQ

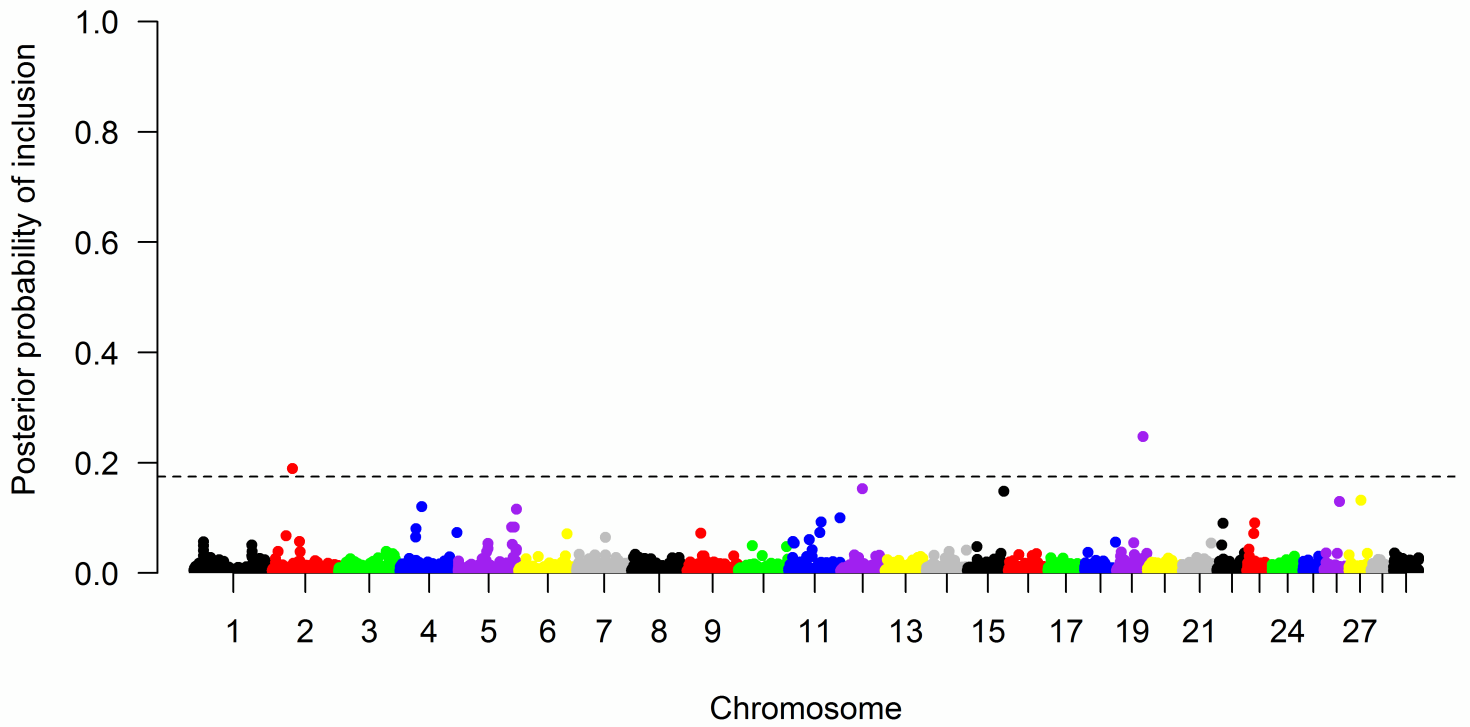

### 20:3n-9 in LL

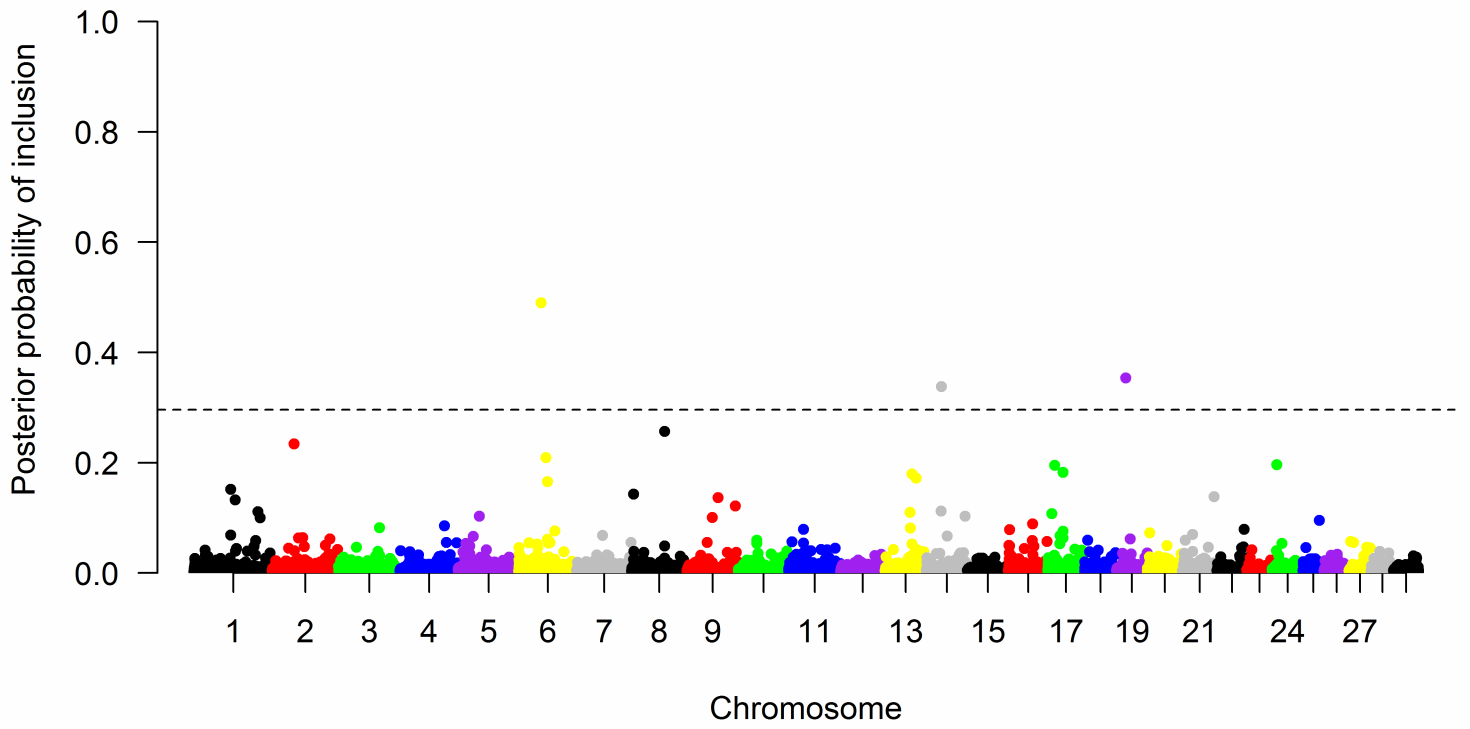

### 20:3n-9 in SQ

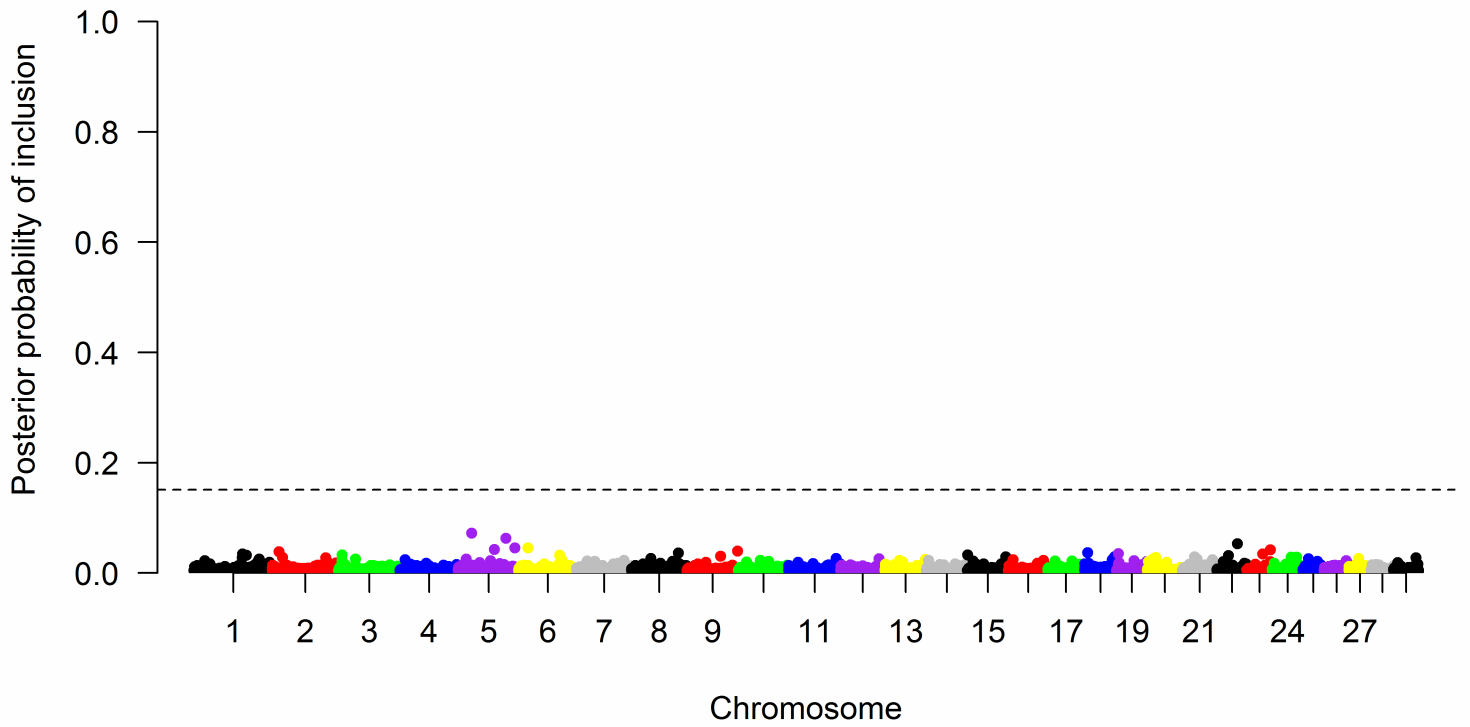





### 20:5n3 in LL

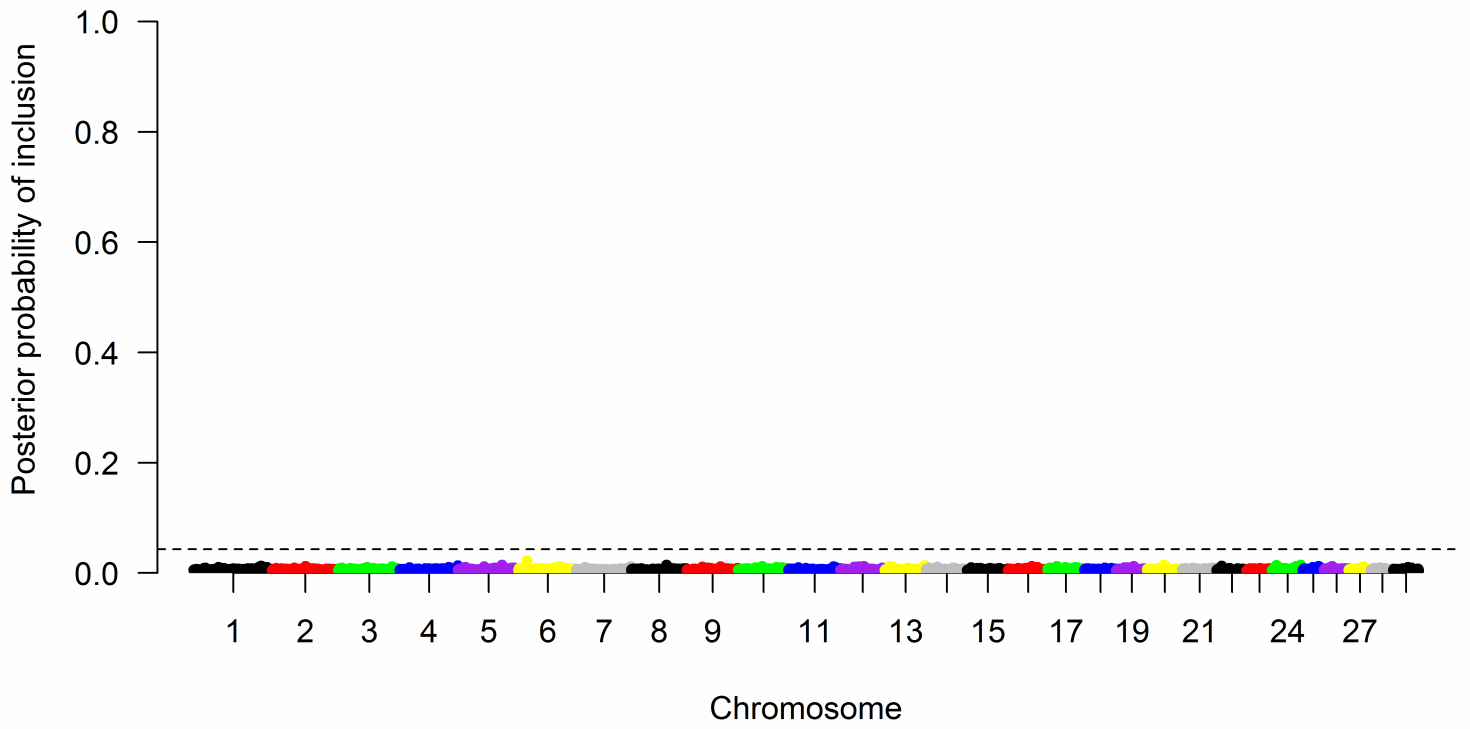

### 22:6n3 in LL

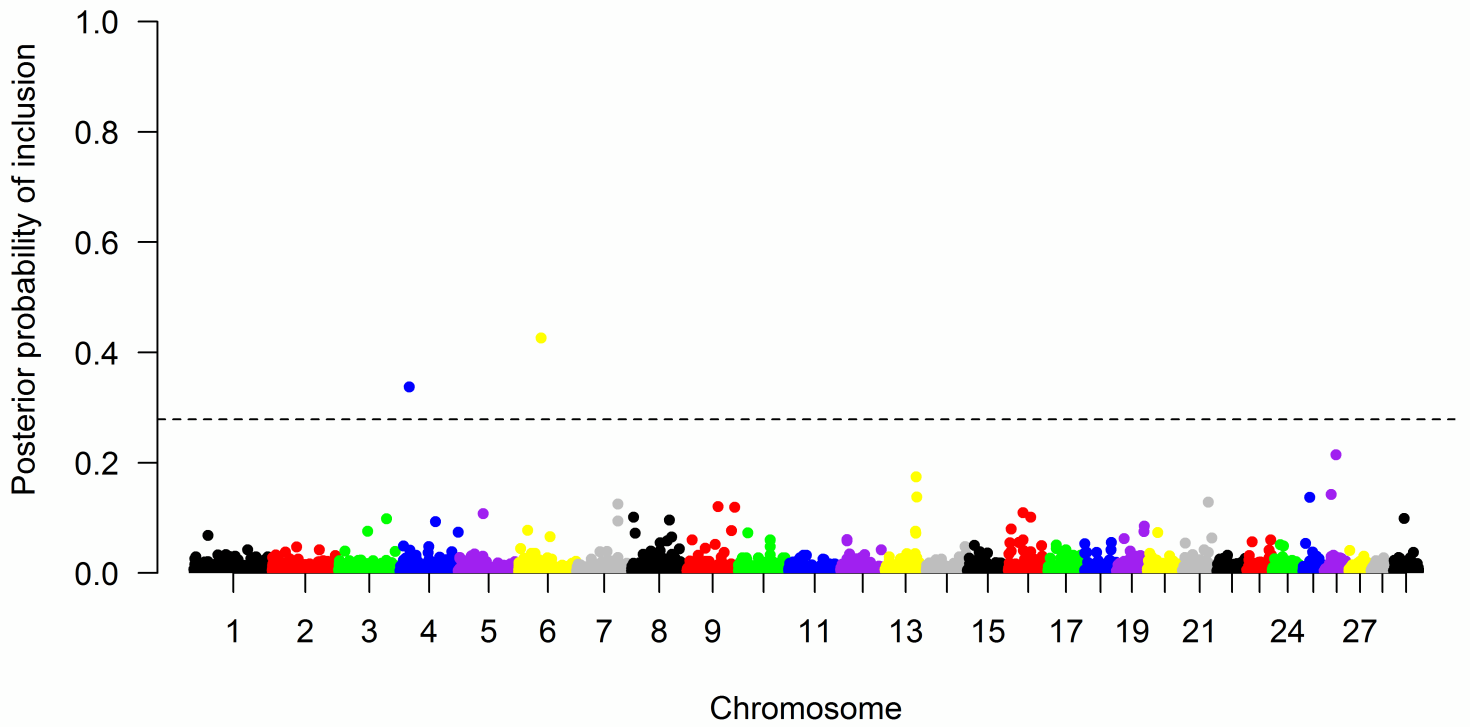

### 22:4n-6 in LL

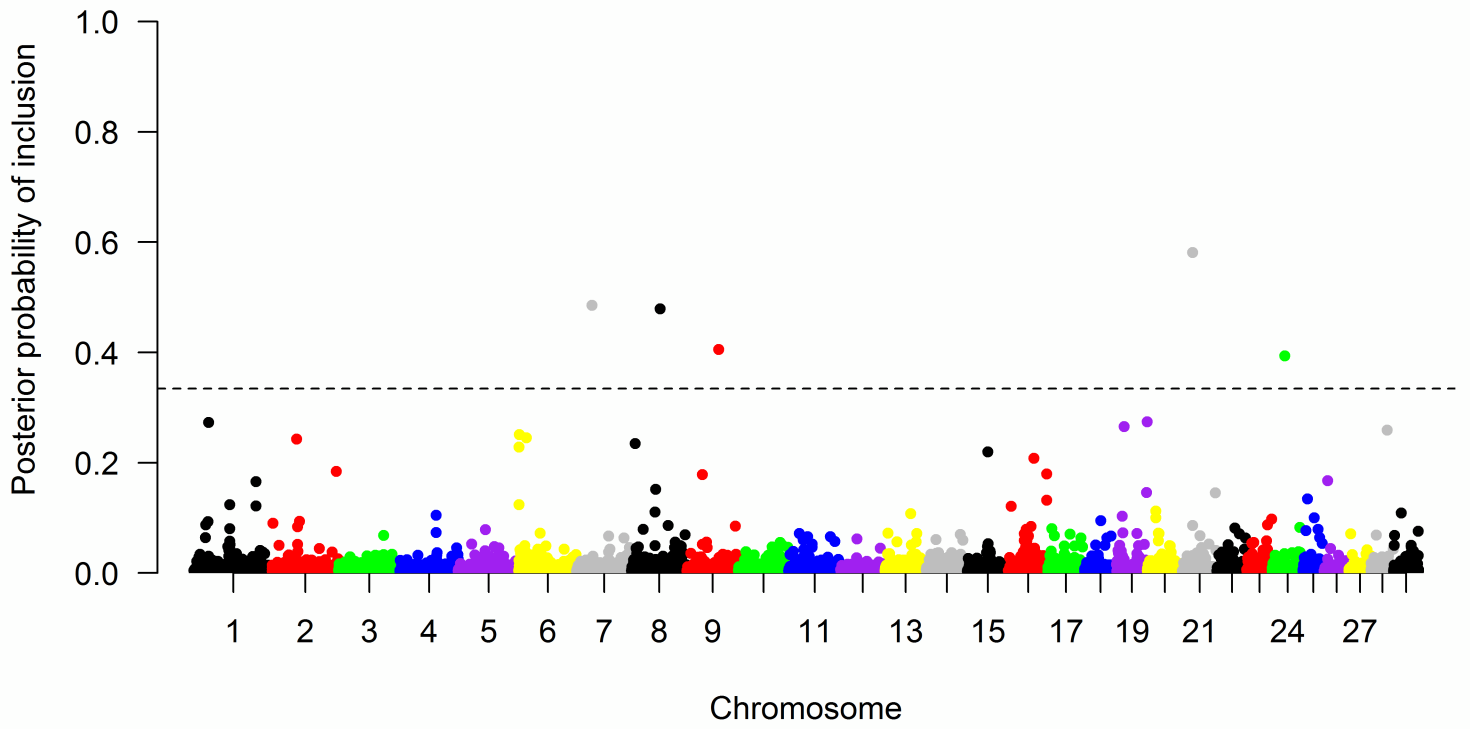

### 22:4n-6 in SQ

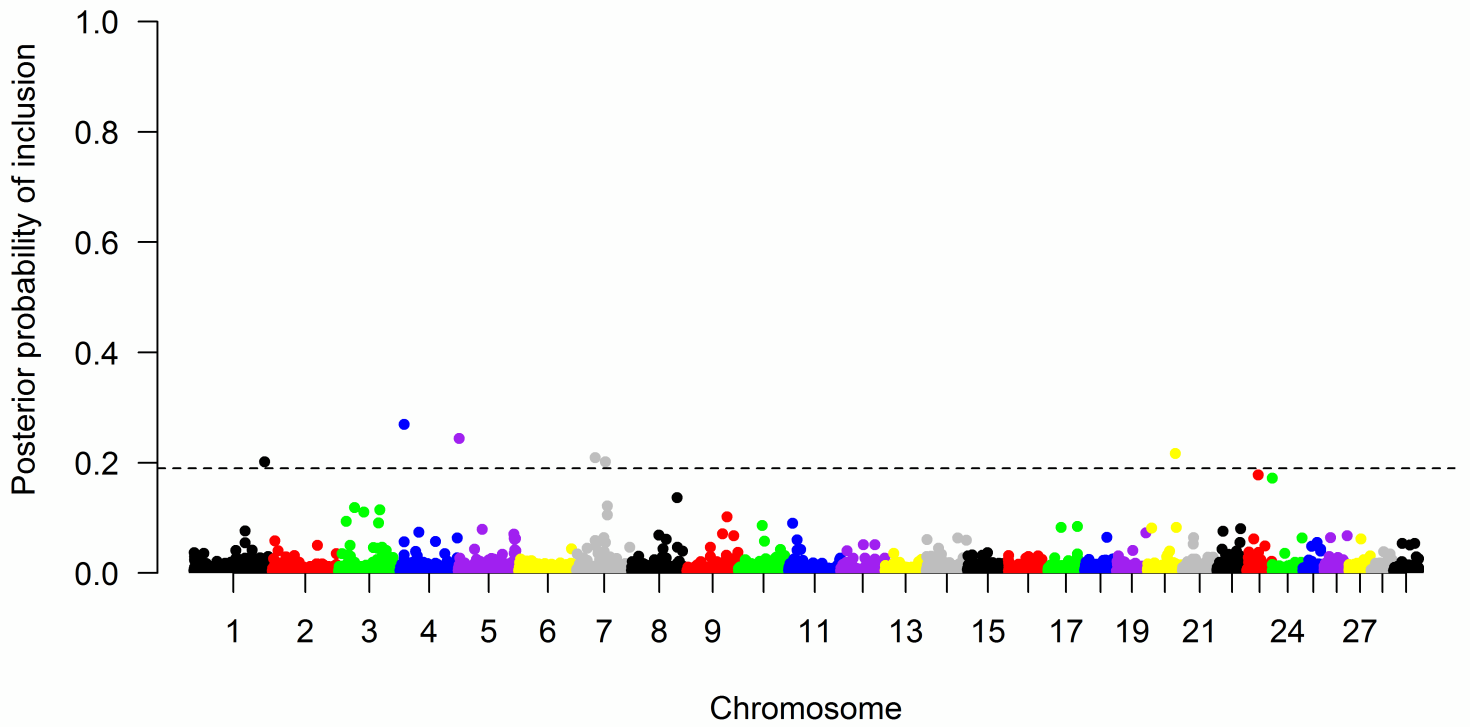

### 22:5n-3 in LL

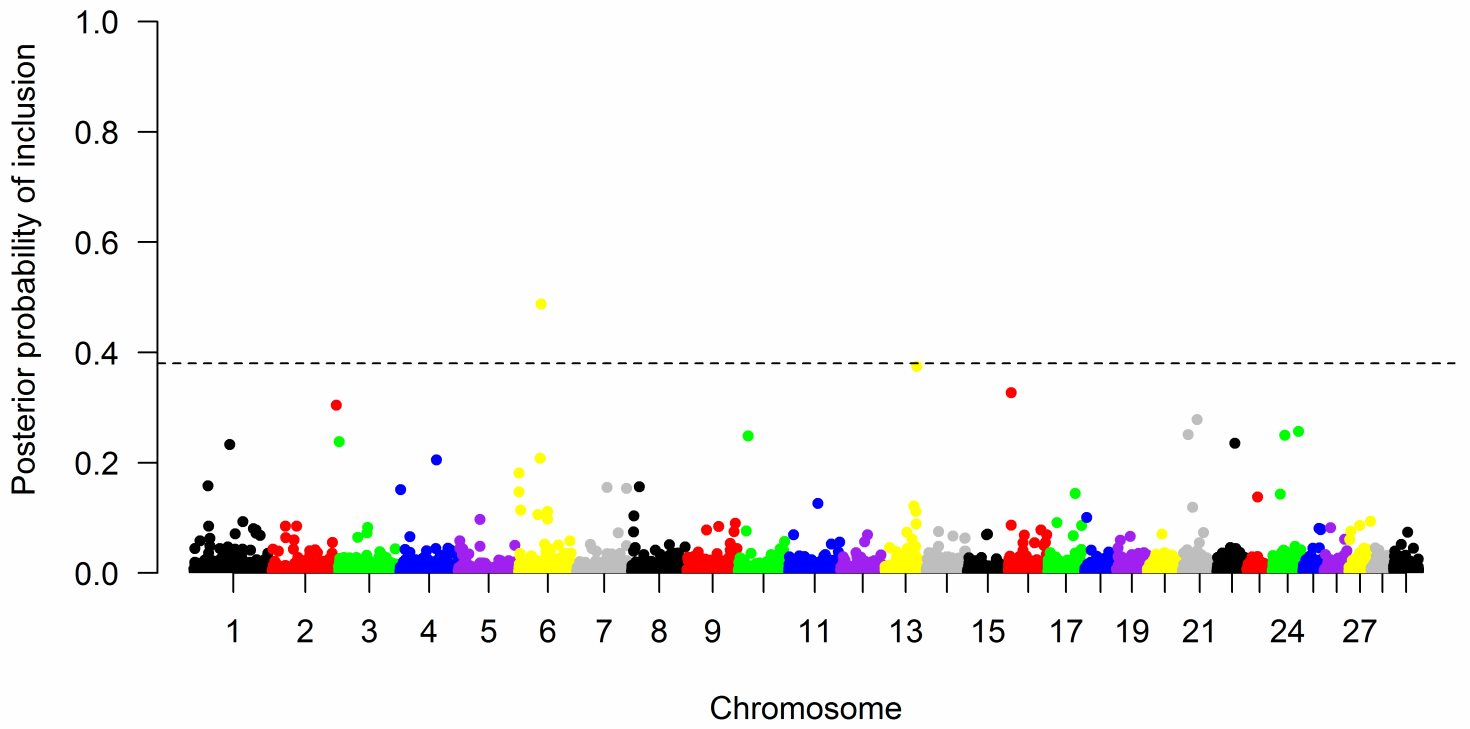

### 22:5n-3 in SQ

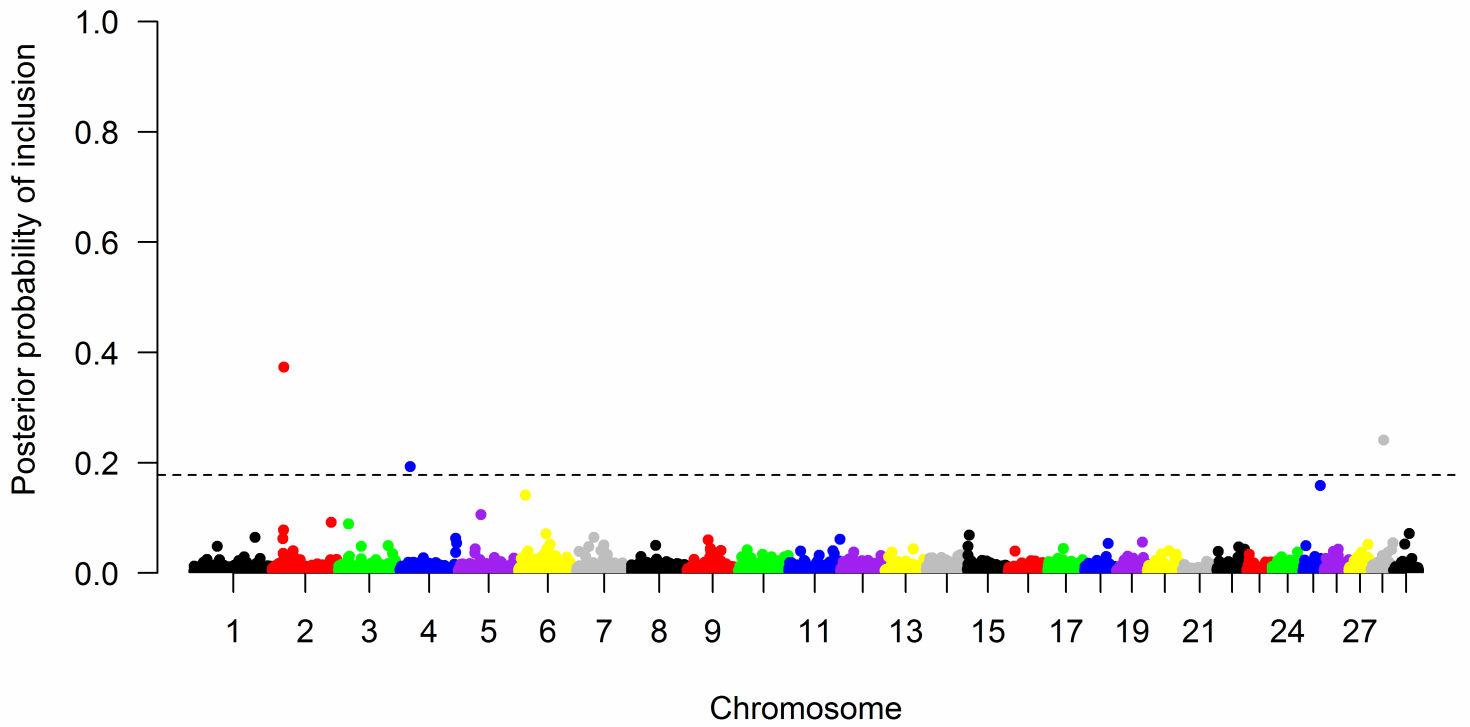

### PUFA in LL

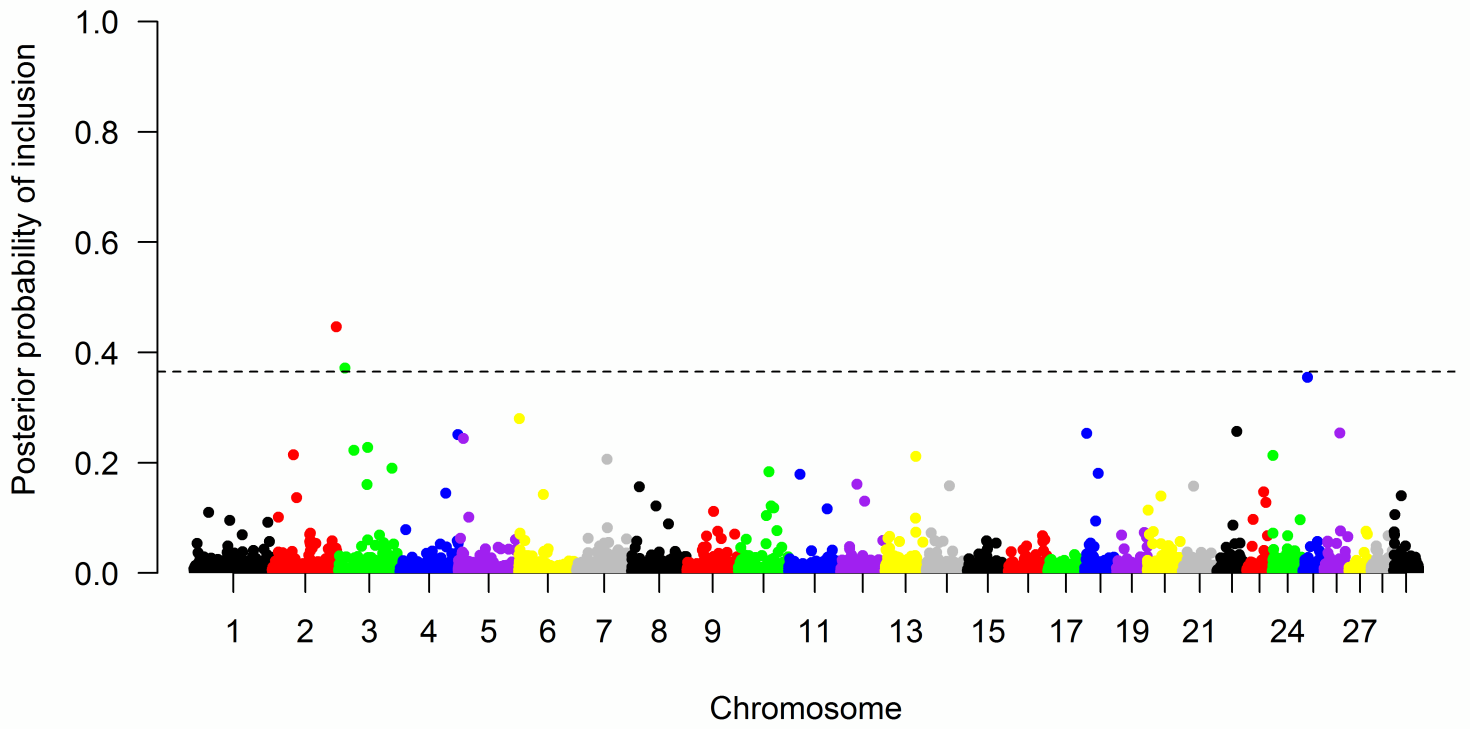

### PUFA in SQ

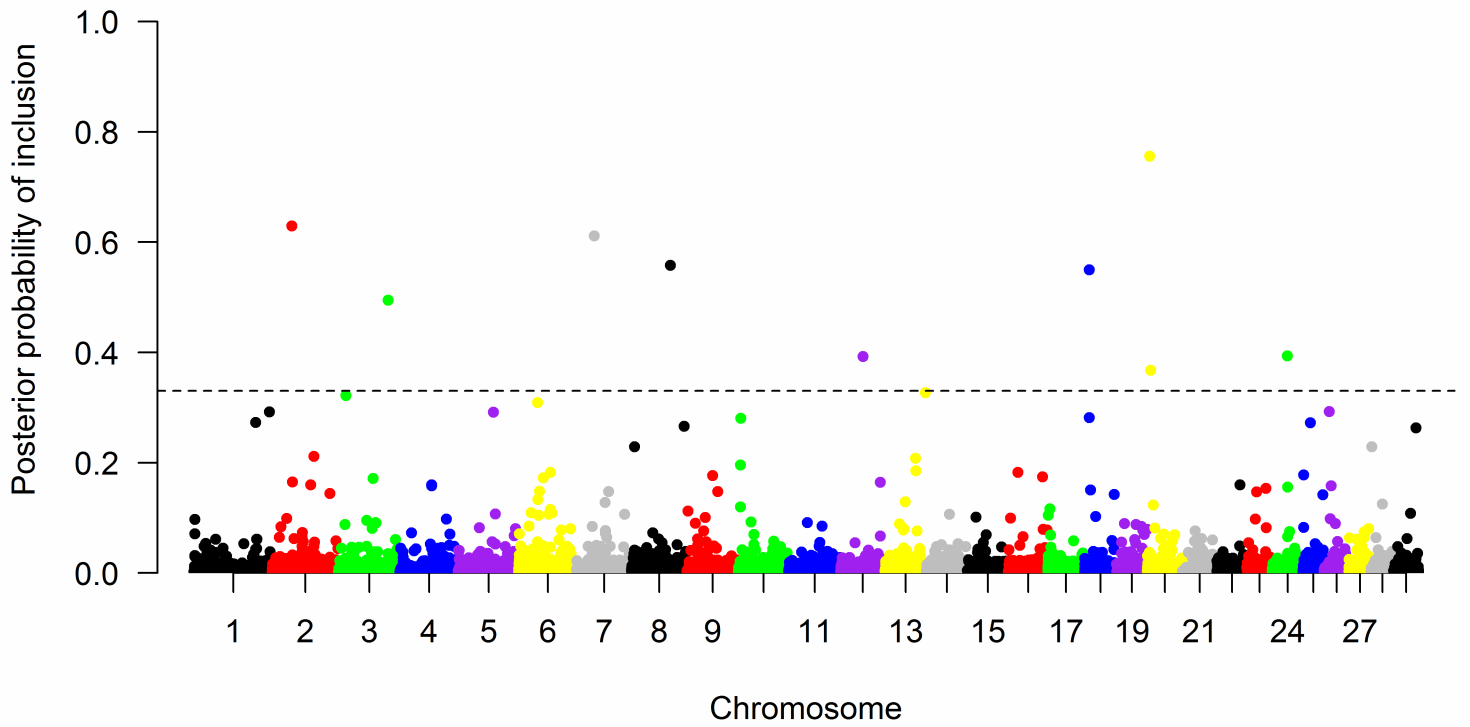

### n-3 in LL

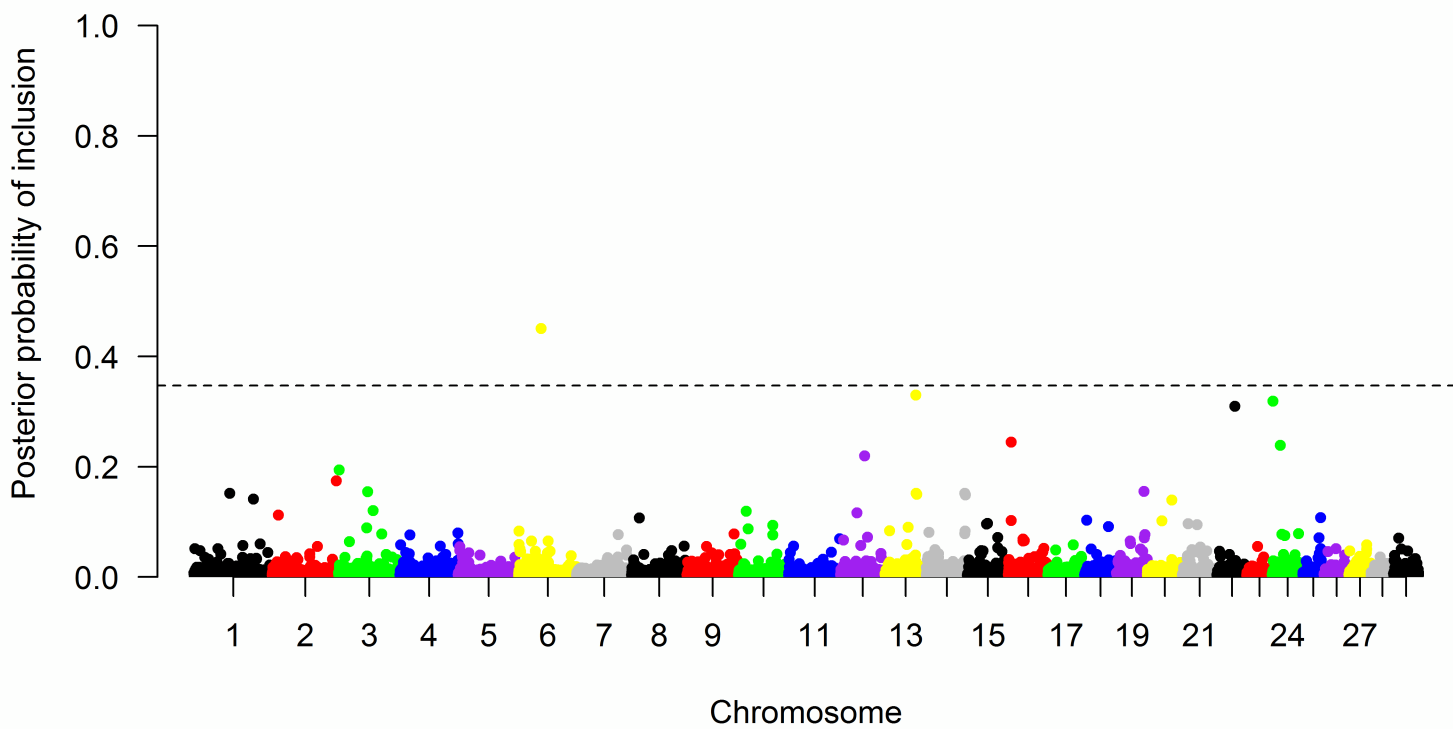

### n-3 in SQ

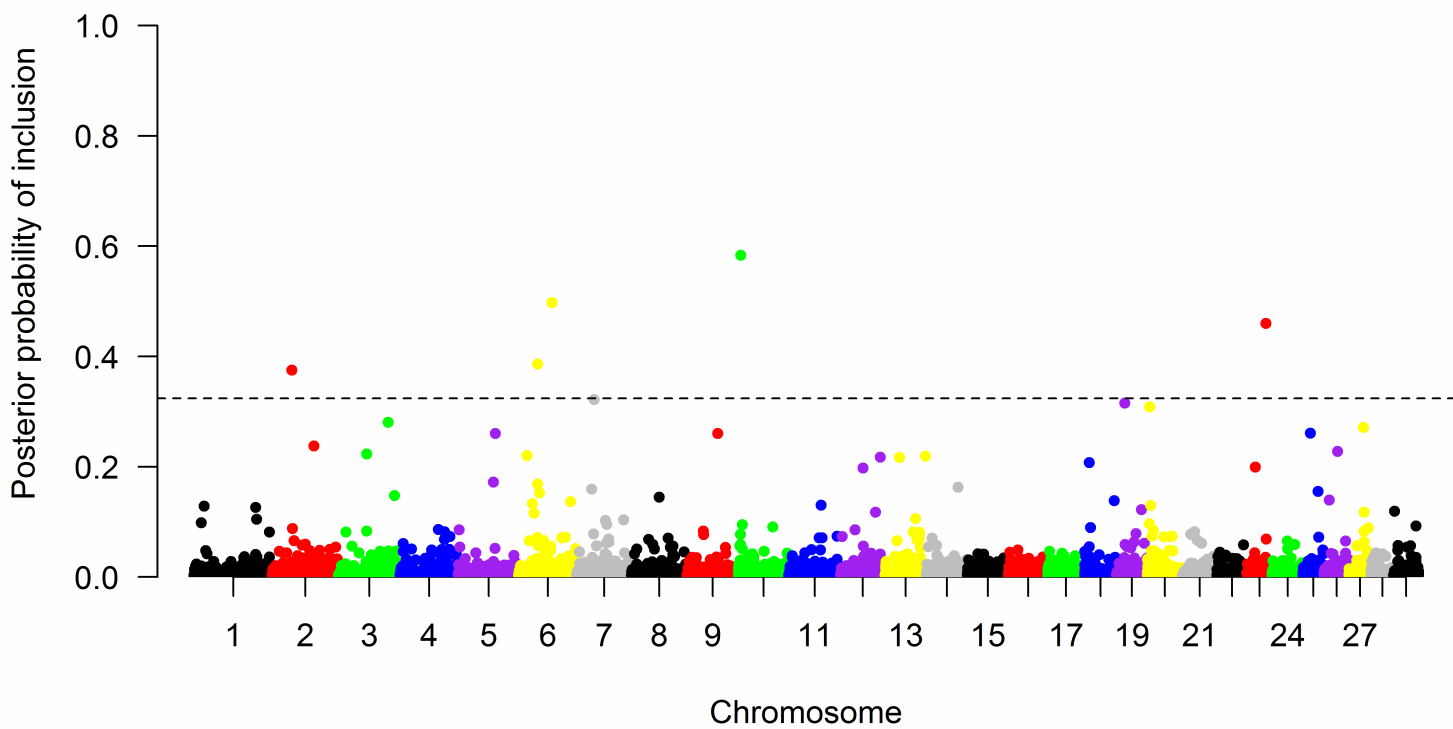

### n-6 in LL

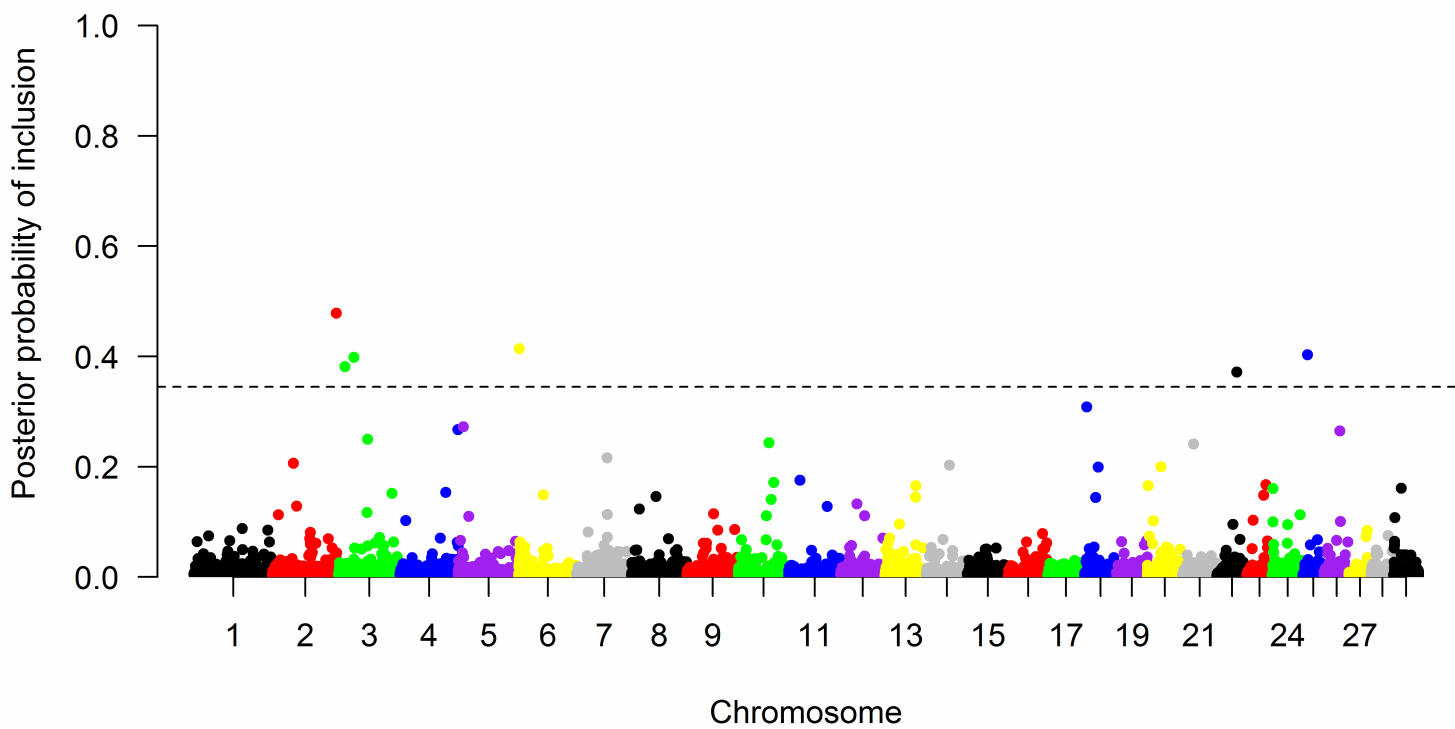

### n-6 in SQ

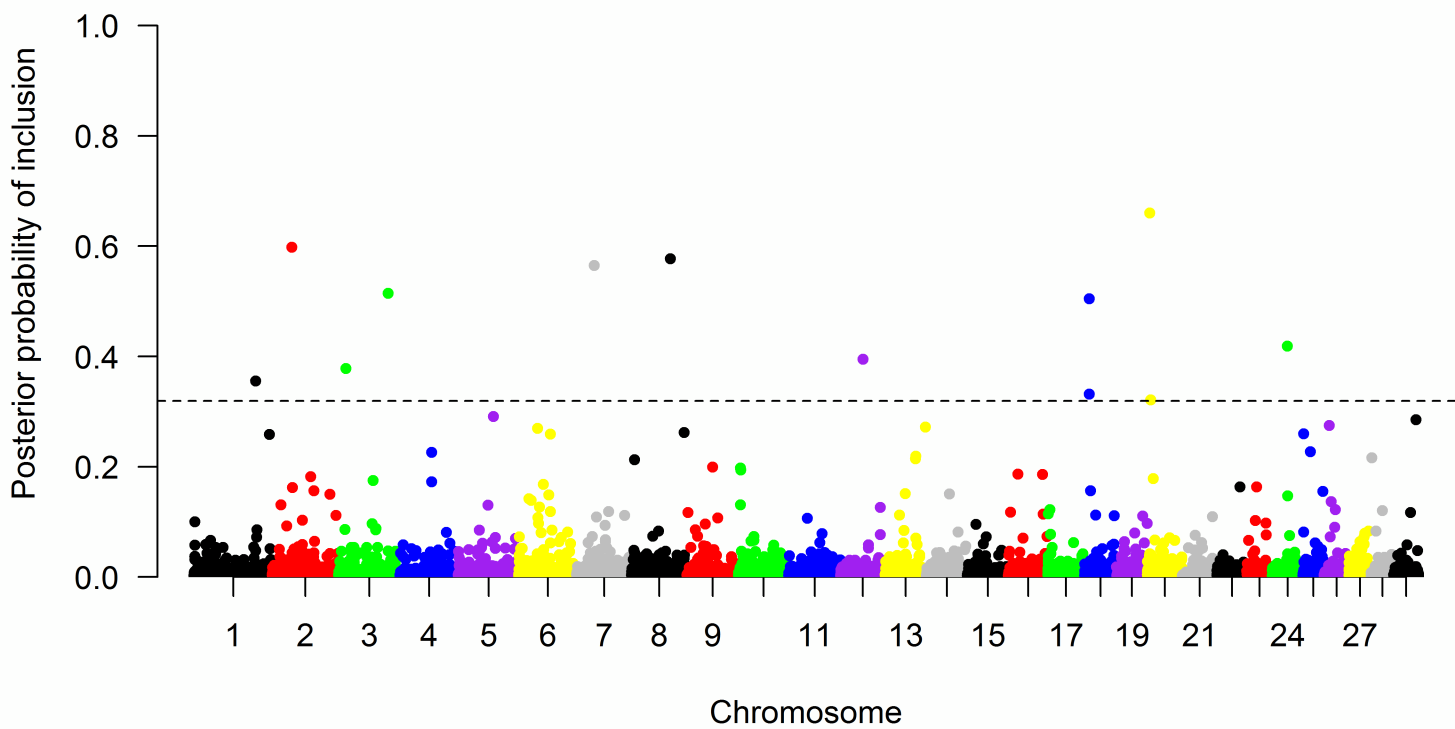

### n-6/n-3 in LL

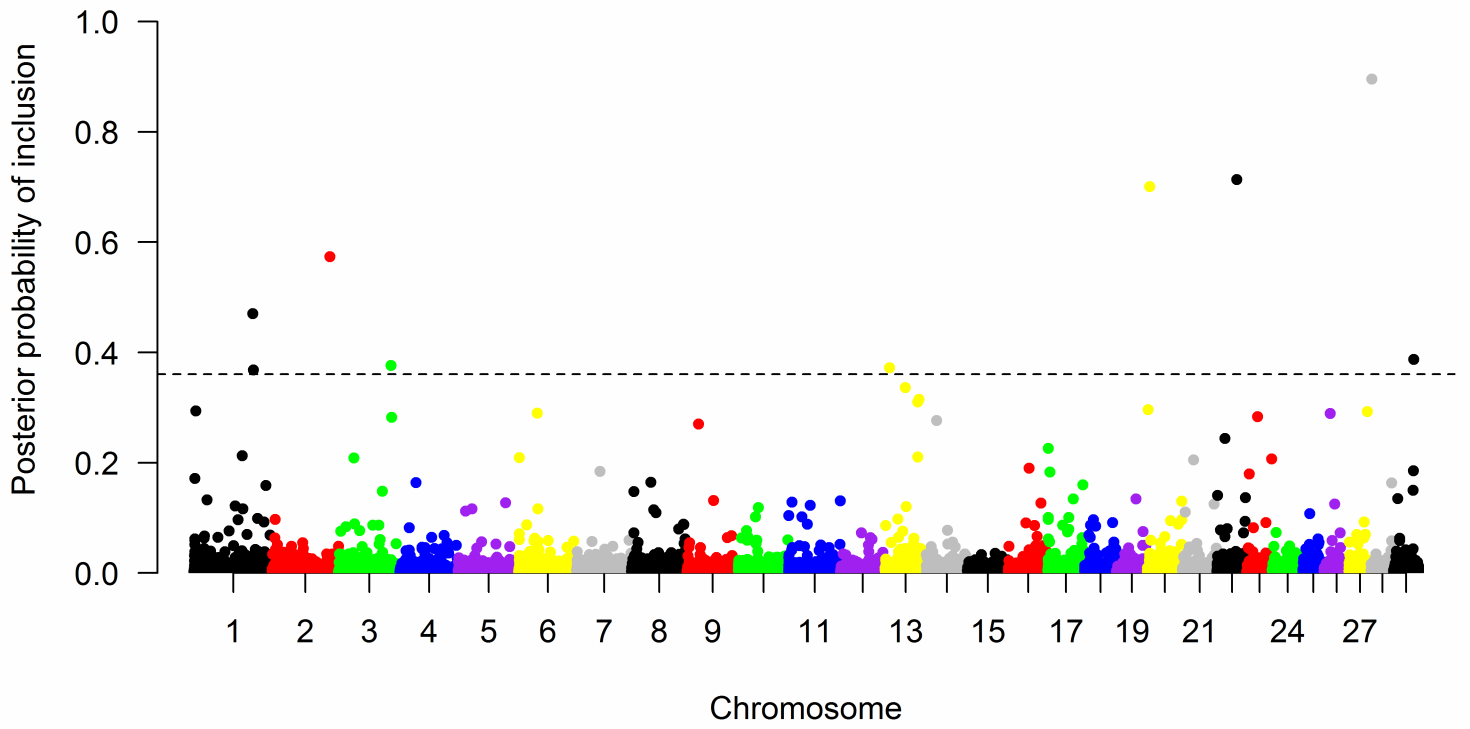

### n-6/n-3 in SQ

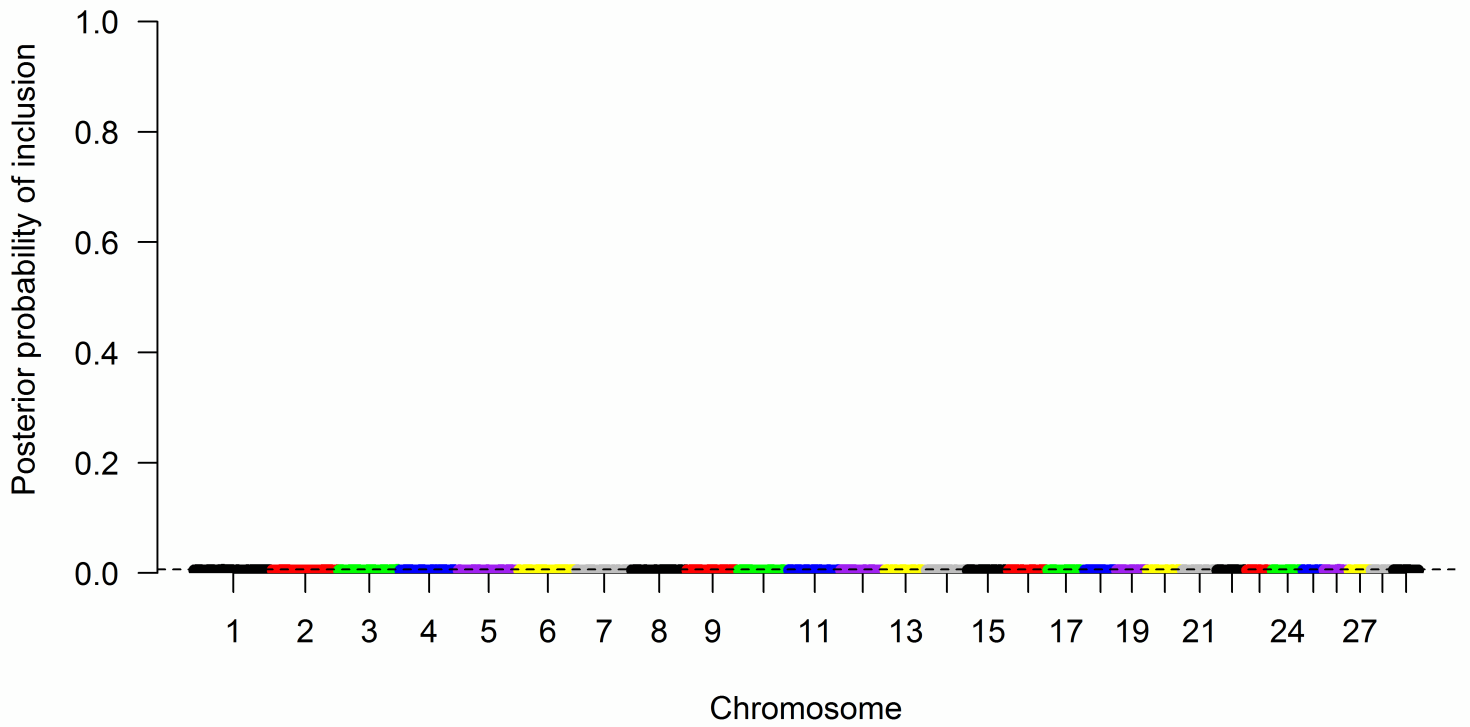

### P/S in LL

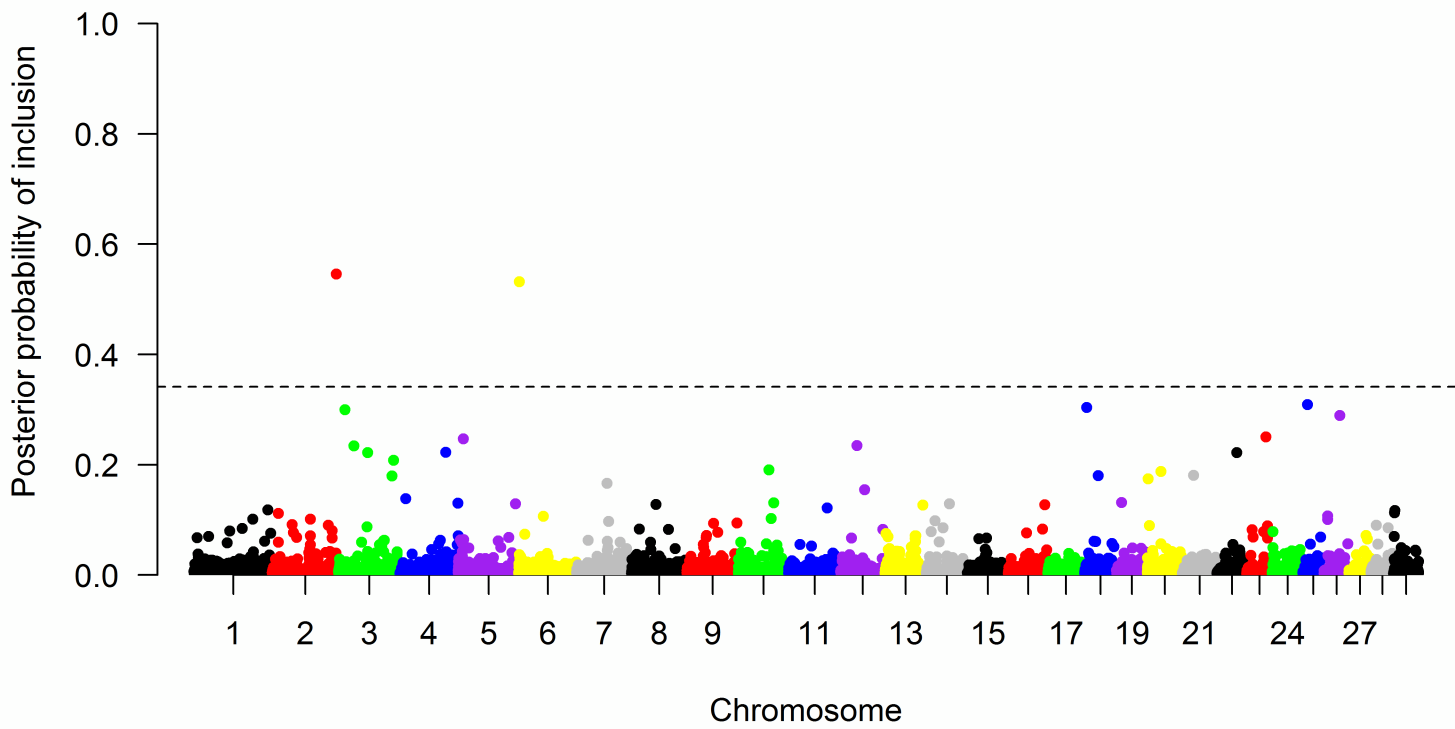

### P/S in SQ

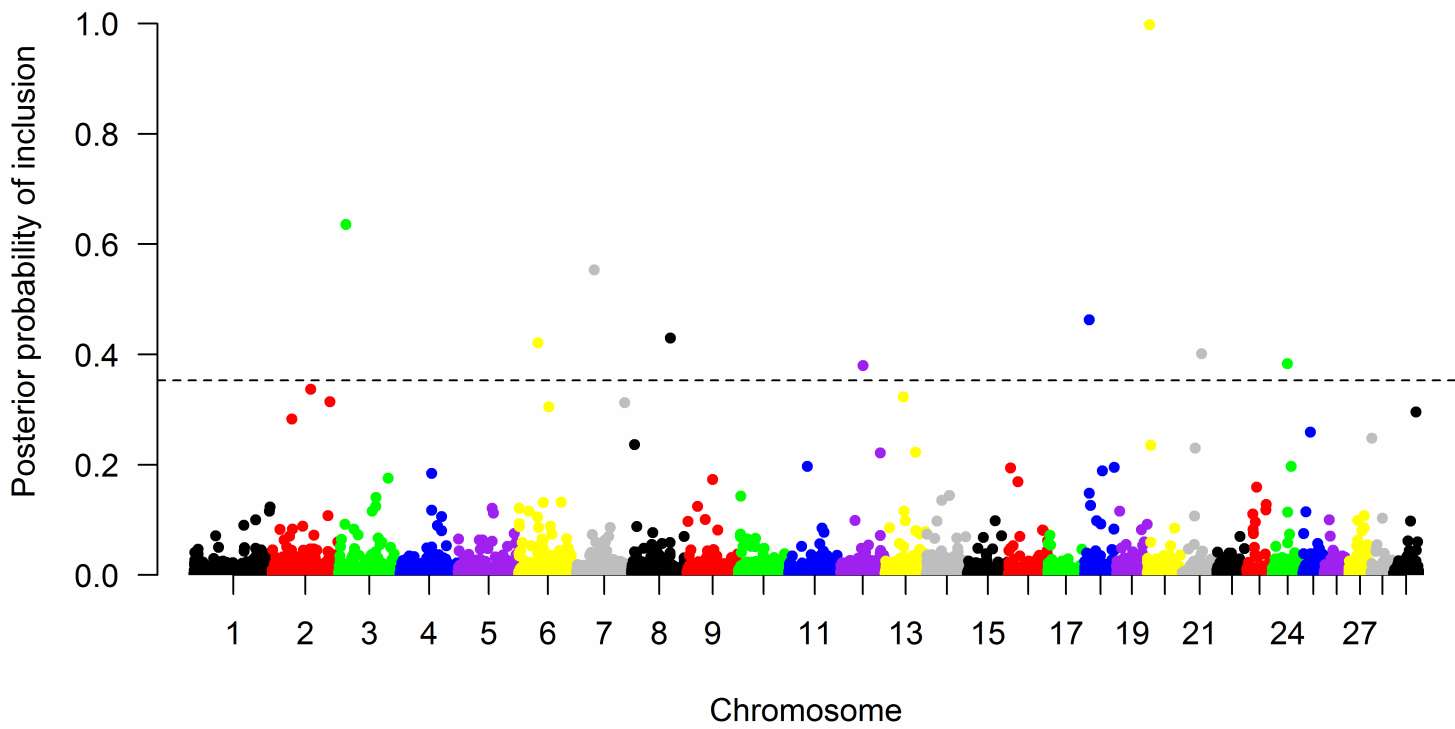



### P/(S+B) in LL

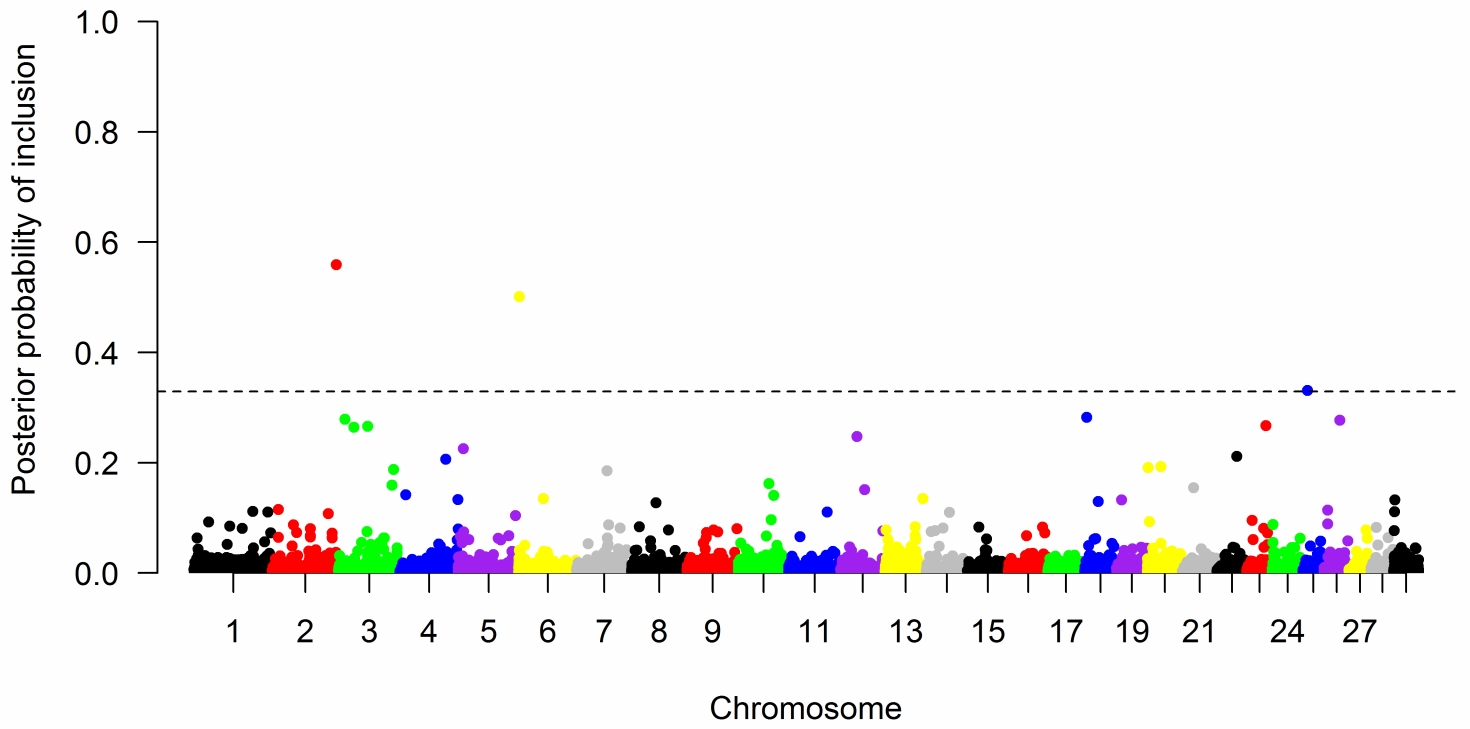

### P/(S+B) in SQ

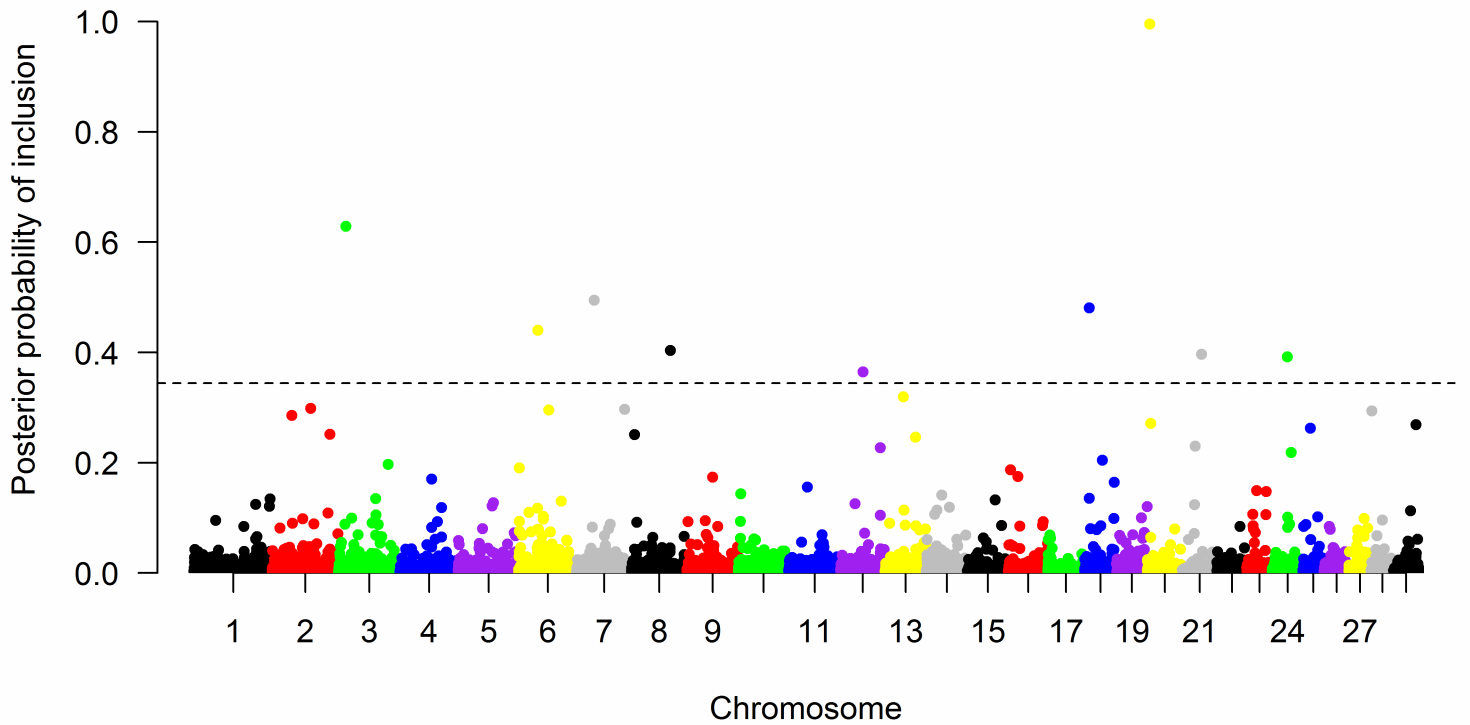

### Health index in LL

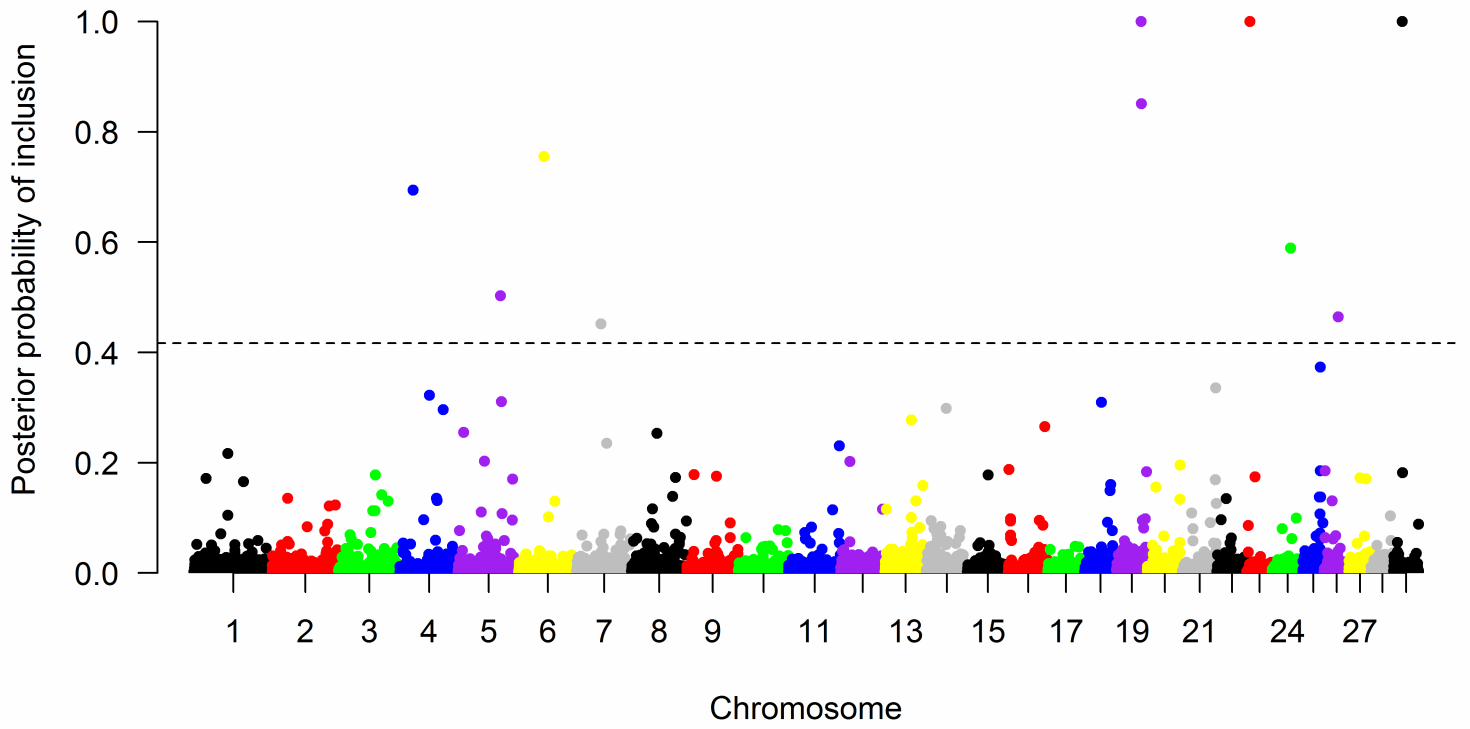

### Health index in SQ

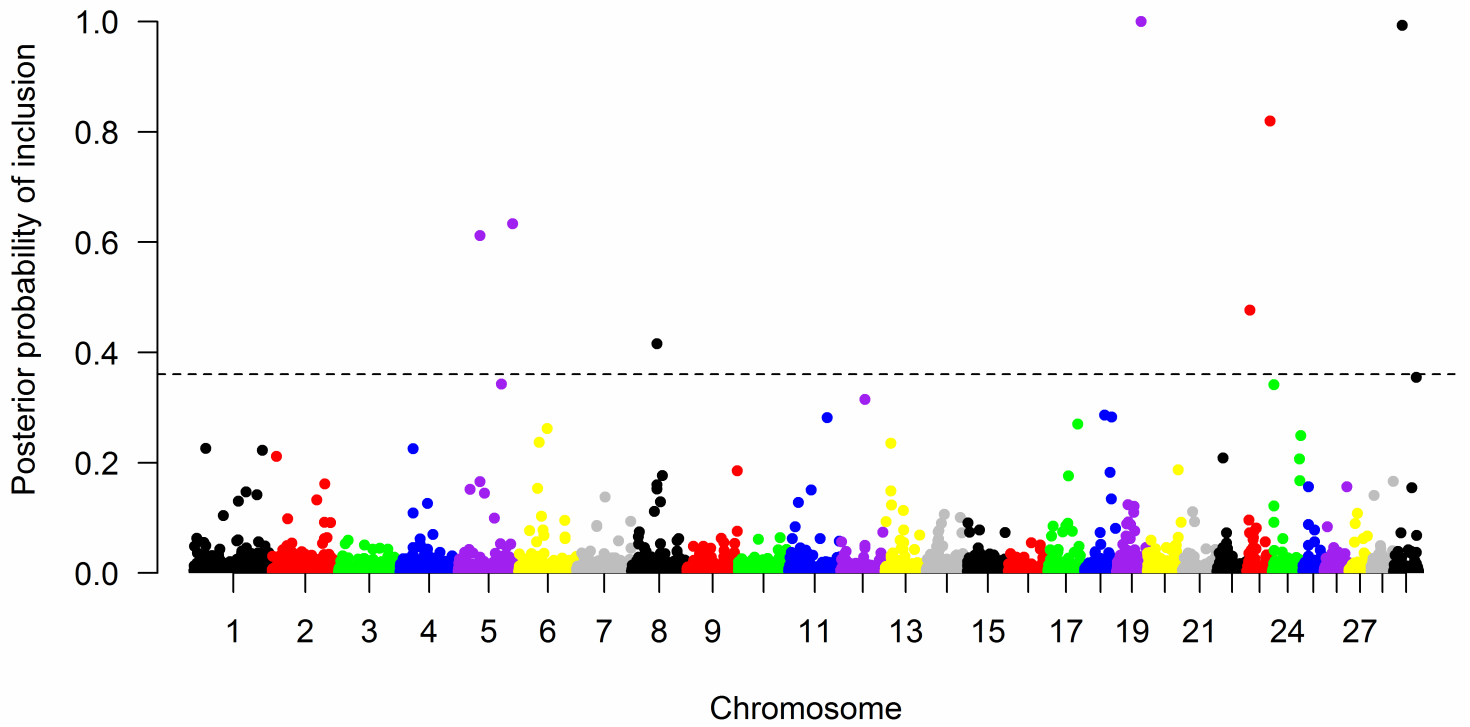

Supplement: 12863_2015_290_MOESM1_ESM.pdf [file 12863_2015_290_MOESM1_ESM.pdf]
